# Supplementary material
Source: Research Square preprint supplement (doi:10.21203/rs.3.rs-9285528/v1)
Supplement: Supplementary file 1 [file d05525b600e5750f977a2dec.pdf]

## Supplementary Materials

### **Distinct structural features associated with conformational epitopes of amyloid $\beta$ fibrils revealed using mathematical geometric measures**

**Masumi Sugiyama<sup>1</sup>, Shang-Te Danny Hsu<sup>1,2</sup>, Eleni Panagiotou<sup>1,6</sup> and Shin-ichi Tate<sup>1,3,4,5,\*</sup>**

<sup>1</sup> International Institute for Sustainability with Knotted Chiral Meta Matter (WPI-SKCM<sup>2</sup>), Hiroshima University, 1-3-1 Kagamiyama, Higashi-Hiroshima 739-8526, Japan

<sup>2</sup> Institute of Biological Chemistry, Academia Sinica, Taipei 11529, Taiwan

<sup>3</sup> Department of Mathematical and Life Sciences, Graduate School for the Integrated Sciences for Life, Hiroshima University, 1-3-1 Kagamiyama, Higashi-Hiroshima 739-8526, Japan

<sup>4</sup> Meiji Institute for Advanced Study of Mathematical Sciences (MIMS), Meiji University, 4-21-1 Nakano, Nakano-ku, Tokyo 164-8525, Japan

<sup>5</sup> Graduate School of Medical Life Science, Yokohama City University, 1-7-29 Suehiro-cho, Tsurumi-ku, Yokohama 230-0045, Japan

<sup>6</sup> School of Mathematical and Statistical Sciences, Arizona State University, Tempe, AZ 85281, USA

\*Corresponding author: Shin-ichi Tate ([tate@hiroshima-u.ac.jp](mailto:tate@hiroshima-u.ac.jp))

**Table S1:** A $\beta$  fibril structure used in this work with its properties.

| PDB code | Source      | Residues in the used peptide | Residues Observed in the structure | method     | Mutation (N: wild-type) |
|----------|-------------|------------------------------|------------------------------------|------------|-------------------------|
| 2beg     | Recombinant | 1-42                         | 17-42                              | NMR        | N                       |
| 2lmn     | Recombinant | 1-40                         | 9-40                               | NMR        | N                       |
| 2lmo     | Recombinant | 1-40                         | 9-40                               | NMR        | N                       |
| 2lmp     | Recombinant | 1-40                         | 9-40                               | NMR        | N                       |
| 2lmq     | Recombinant | 1-40                         | 9-40                               | NMR        | N                       |
| 2lnq     | Recombinant | 1-40                         | 15-40                              | NMR        | Iowa mutation D23N      |
| 2m4j     | Recombinant | 1-40                         | 1-40                               | NMR        | N                       |
| 2mpz     | Recombinant | 1-40                         | 15-40                              | NMR        | Iowa mutation D23N      |
| 2mxu     | Recombinant | 1-42                         | 11-42                              | NMR        | N                       |
| 2nao     | Recombinant | 1-42                         | 1-42                               | NMR        | N                       |
| 5kk3     | Recombinant | 1-42                         | 11-42                              | NMR        | N                       |
| 6oiz     | Synthetic   | 1-42                         | 20-34                              | EC         | N                       |
| 6shs     | Clinical    | 1-40                         | 1-40                               | EM         | N                       |
| 6it5     | Recombinant | 1-40                         | 11-40                              | NMR        | N                       |
| 6ti6     | Recombinant | 1-40, 1-42                   | 11-42                              | NMR        | N                       |
| 6o0w     | Recombinant | 1-40                         | 10-40                              | EM;<br>NMR | N                       |
| 7f29     | Synthetic   | 1-42                         | 6-42                               | EM         | Glycosylated at Tyr10   |
| 7q4b     | Clinical    | 1-42                         | 9-42                               | EM         | N                       |
| 7q4m     | Clinical    | 1-42                         | 12-42                              | EM         | N                       |
| 8azs     | Clinical    | 1-42                         | 9-42                               | EM         | N                       |
| 8azt     | Clinical    | 1-42                         | 12-42                              | EM         | N                       |
| 8bfa     | Recombinant | 1-42                         | 1-38                               | EM         | Arctic mutation E22G    |
| 8bfb     | Recombinant | 1-42                         | 1-38                               | EM         | Arctic mutation E22G    |
| 8bfz     | Clinical    | 1-42                         | 12-42                              | EM         | Arctic mutation E22G    |
| 8bg0     | Clinical    | 1-40                         | 11-37, 12-40                       | EM         | Arctic mutation E22G    |
| 8bg9     | Recombinant | 1-40                         | 1-37                               | EM         | Arctic mutation E22G    |
| 8ezd     | Recombinant | 1-42                         | 12-42                              | EM         | N                       |
| 8eze     | Recombinant | 1-42                         | 1-42                               | EM         | N                       |
| 8kew     | Clinical    | 1-42                         | 9-42                               | EM         | N                       |
| 8kf1     | Clinical    | 1-42                         | 9-42                               | EM         | N                       |
| 8kf3     | Clinical    | 1-42                         | 9-42,12-42                         | EM         | N                       |

|      |             |      |                      |    |                          |
|------|-------------|------|----------------------|----|--------------------------|
| 8kf4 | Clinical    | 1-42 | 9-42                 | EM | N                        |
| 8kf5 | Clinical    | 1-42 | 9-42                 | EM | N                        |
| 8kf6 | Clinical    | 1-42 | 9-42, 12-42          | EM | N                        |
| 8ol2 | Recombinant | 1-42 | 12-42                | EM | N                        |
| 8ol3 | Recombinant | 1-42 | 10-42                | EM | N                        |
| 8ol5 | Recombinant | 1-42 | 12-42                | EM | N                        |
| 8ol6 | Recombinant | 1-42 | 12-42                | EM | N                        |
| 8ol7 | Recombinant | 1-42 | 9-40                 | EM | Arctic mutation E22G     |
| 8olg | Recombinant | 1-42 | 1-39                 | EM | Arctic, iowa E22G & D23N |
| 8oln | Recombinant | 1-42 | 1-36                 | EM | Arctic, iowa E22G & D23N |
| 8olo | Recombinant | 1-42 | 10-40                | EM | N                        |
| 8olq | Recombinant | 1-42 | 2-33                 | EM | Arctic, iowa E22G & D23N |
| 8ot1 | Recombinant | 1-40 | 13-40                | EM | N                        |
| 8ot3 | Recombinant | 1-40 | 13-40                | EM | N                        |
| 8ot4 | Recombinant | 1-40 | 1-37                 | EM | N                        |
| 8otf | Clinical    | 1-42 | 12-42                | EM | N                        |
| 8ovk | Recombinant | 1-40 | 1-40                 | EM | N                        |
| 8ovm | Recombinant | 1-40 | 5-40                 | EM | N                        |
| 8owd | Recombinant | 1-40 | 1-40                 | EM | N                        |
| 8owe | Recombinant | 1-40 | 1-40, 4-40           | EM | N                        |
| 8owj | Recombinant | 1-40 | 5-40                 | EM | N                        |
| 8owk | Recombinant | 1-40 | 1-40                 | EM | N                        |
| 8qn6 | Clinical    | 1-40 | 1-38                 | EM | N                        |
| 8qn7 | Clinical    | 1-40 | 1-38                 | EM | N                        |
| 8sej | Clinical    | 1-42 | 9-42                 | EM | Down syndrome + AD       |
| 8sek | Clinical    | 1-40 | 9-40                 | EM | Down syndrome + AD       |
| 8sel | Clinical    | 1-40 | 8-40, 1-40           | EM | Down syndrome + AD       |
| 9jaz | Synthetic   | 1-42 | 9-42                 | EM | D-Asp23                  |
| 9jb0 | Synthetic   | 1-42 | 9-42                 | EM | D-Asp23                  |
| 9jb1 | Synthetic   | 1-42 | 9-42                 | EM | D-Asp7&23                |
| 9jb2 | Synthetic   | 1-42 | 9-42, 1-42,<br>15-42 | EM | D-Asp7&23                |

**Table S2:** The number of peptides having their aaWr(*l*) values of lacanemab (21-29) epitope greater than 95% percentile rank of the aaWr(*l*) values for A $\beta$  fibrils, and the mean percentile rank over all peptides.

| PDB code <sup>a)</sup> | Number of peptides in the fibril | Number of peptides having aaWr( <i>l</i> ) > 95% percentile rank: aaWr( <i>l</i> )* | Mean percentile rank (%) |
|------------------------|----------------------------------|-------------------------------------------------------------------------------------|--------------------------|
| 2beg                   | 5                                | 0                                                                                   | 54                       |
| <b>2lmn</b>            | 12                               | 4                                                                                   | 84                       |
| <b>2lmo</b>            | 12                               | 2                                                                                   | 75                       |
| 2lmp                   | 18                               | 0                                                                                   | 57                       |
| <b>2lmq</b>            | 18                               | 1                                                                                   | 75                       |
| 2lnq                   | 8                                | 0                                                                                   | 72                       |
| 2m4j                   | 9                                | 0                                                                                   | 63                       |
| 2mpz                   | 27                               | 0                                                                                   | 61                       |
| 2mxu                   | 12                               | 0                                                                                   | 10                       |
| 2nao                   | 6                                | 0                                                                                   | 66                       |
| <b>5kk3</b>            | 18                               | 9                                                                                   | 79                       |
| 6oiz                   | 1                                | 0                                                                                   | 29                       |
| 6shs                   | 12                               | 0                                                                                   | 59                       |
| <b>6it5</b>            | 16                               | 9                                                                                   | 84                       |
| 6ti6                   | 8                                | 0                                                                                   | 58                       |
| 6o0w                   | 6                                | 0                                                                                   | 89                       |
| 7f29                   | 6                                | 0                                                                                   | 31                       |
| 7q4b                   | 10                               | 0                                                                                   | 46                       |
| <b>7q4m</b>            | 10                               | 10                                                                                  | 96                       |
| 8azs                   | 1                                | 0                                                                                   | 69                       |
| <b>8azt</b>            | 1                                | 1                                                                                   | 95                       |
| 8bfa                   | 10                               | 0                                                                                   | 80                       |
| 8bfb                   | 10                               | 0                                                                                   | 80                       |
| <b>8bfz</b>            | 2                                | 2                                                                                   | 100                      |
| 8bg0 (11-37)           | 2                                | 0                                                                                   | 84                       |
| 8bg0 (12-40)           | 2                                | 0                                                                                   | 83                       |
| 8bg9                   | 2                                | 0                                                                                   | 57                       |
| 8ezd                   | 8                                | 0                                                                                   | 74                       |
| <b>8eze</b>            | 8                                | 8                                                                                   | 100                      |
| 8kew                   | 6                                | 0                                                                                   | 38                       |
| 8kfl                   | 12                               | 0                                                                                   | 76                       |

|                     |    |    |     |
|---------------------|----|----|-----|
| <b>8kf3 (9-42)</b>  | 6  | 4  | 97  |
| <b>8kf3 (12-42)</b> | 3  | 1  | 86  |
| 8kf4                | 6  | 0  | 54  |
| 8kf5                | 6  | 0  | 88  |
| 8kf6 (9-42)         | 6  | 0  | 81  |
| <b>8kf6 (12-42)</b> | 3  | 2  | 94  |
| <b>8ol2</b>         | 10 | 10 | 96  |
| <b>8ol3</b>         | 10 | 9  | 96  |
| 8ol5                | 10 | 0  | 91  |
| <b>8ol6</b>         | 10 | 10 | 96  |
| 8ol7                | 10 | 0  | 83  |
| 8olg                | 5  | 0  | 81  |
| 8oln                | 10 | 0  | 87  |
| 8olo                | 10 | 0  | 87  |
| 8olq                | 5  | 0  | 71  |
| 8ot1                | 12 | 0  | 90  |
| 8ot3                | 12 | 0  | 90  |
| 8ot4                | 12 | 0  | 90  |
| <b>8otf</b>         | 6  | 6  | 98  |
| <b>8ovk</b>         | 10 | 10 | 97  |
| <b>8ovm</b>         | 5  | 5  | 100 |
| <b>8owd</b>         | 5  | 5  | 100 |
| 8owe (1-40)         | 5  | 0  | 91  |
| <b>8owe (4-40)</b>  | 5  | 5  | 100 |
| <b>8owj</b>         | 10 | 10 | 100 |
| 8owk                | 10 | 0  | 14  |
| 8qn6                | 2  | 0  | 77  |
| 8qn7                | 1  | 0  | 93  |
| 8sej                | 10 | 0  | 88  |
| 8sek                | 10 | 0  | 46  |
| 8sel (8-40)         | 10 | 0  | 92  |
| <b>8sel (1-40)</b>  | 10 | 10 | 97  |
| 9jaz                | 12 | 0  | 77  |
| 9jb0                | 12 | 0  | 62  |
| 9jb1                | 12 | 0  | 27  |

|              |   |   |    |
|--------------|---|---|----|
| 9jb2 (9-42)  | 5 | 0 | 84 |
| 9jb2 (1-42)  | 5 | 0 | 57 |
| 9jb2 (15-42) | 5 | 0 | 72 |

a) The PDB codes of 22 A $\beta$  fibrils that have the A $\beta$  peptides with aaWr(l)\* are marked in bold.

**Table S3:** A $\beta$  fibrils containing identical A $\beta$  peptide structures. Two peptides in a fibril structure are identical if their absolute writhe values differ by less than 0.001. If all their peptides are identical, A $\beta$  fibrils are considered to have identical peptide structures.

| PDB code with identical peptide structures                                                                                                                                                                                                             | PDB code with varied peptide structures                                                                                                          |
|--------------------------------------------------------------------------------------------------------------------------------------------------------------------------------------------------------------------------------------------------------|--------------------------------------------------------------------------------------------------------------------------------------------------|
| 2mpz, 6oiz, 6shs, 7f29, 7q4b, 8azs, 8azt, 8bfa, 8bfb, 8bg0 (11-37), 8ezd, 8kew, 8kf1, 8kf4, 8kf5, 8ol2, 8ol3, 8ol5, 8ol6, 8ol7, 8olg, 8oln, 8olo, 8olq, 8ot1, 8ot3, 8ot4, 8ovk, 8ovm, 8owd, 8owe, 8owj, 8owk, 8qn7, 8sej, 8sek, 8sel, 9jaz, 9jb0, 9jb1 | 2beg, 2lmn, 2lmo, 2lmp, 2lmq, 2lnq, 2m4j, 2mxu, 2nao, 5kk3, 6ti5, 6ti6, 6w0o, 7q4m, 8bfz, 8bg0 (12-40), 8bg9, 8eze, 8kf3, 8kf6, 8otf, 8qn6, 9bj2 |

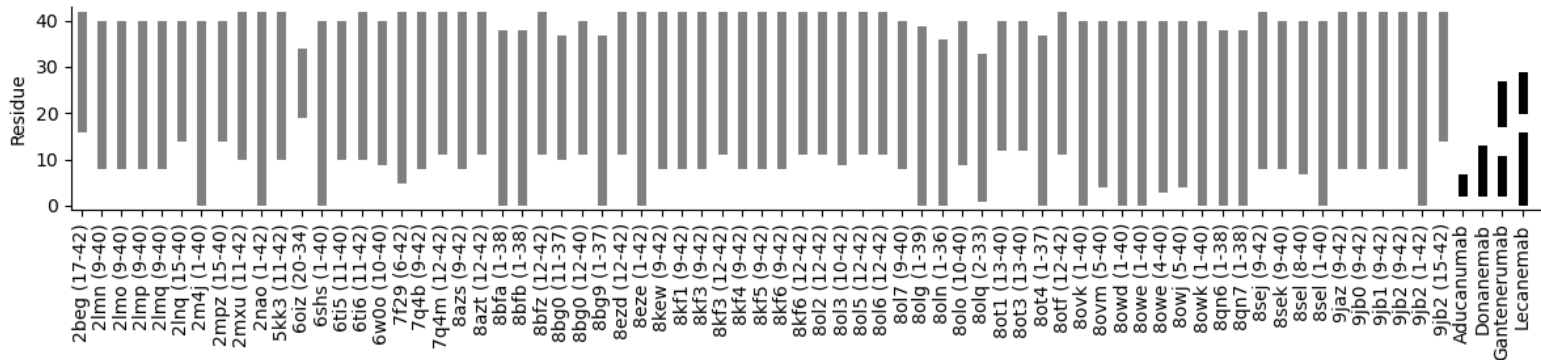

**Figure S1:** The Aβ residues in 69 different fibrils (gray bars) with regions of the epitopes targeted by the four representative second-generation mAbs (black bars). Each fibril is denoted by its PDB accession code and the residues of Aβ in the structure.

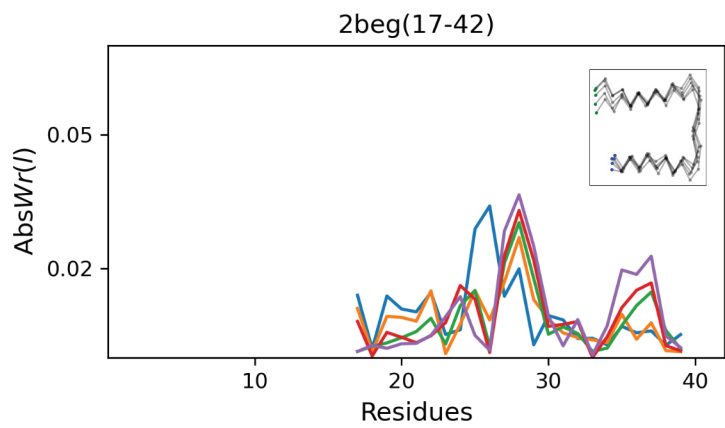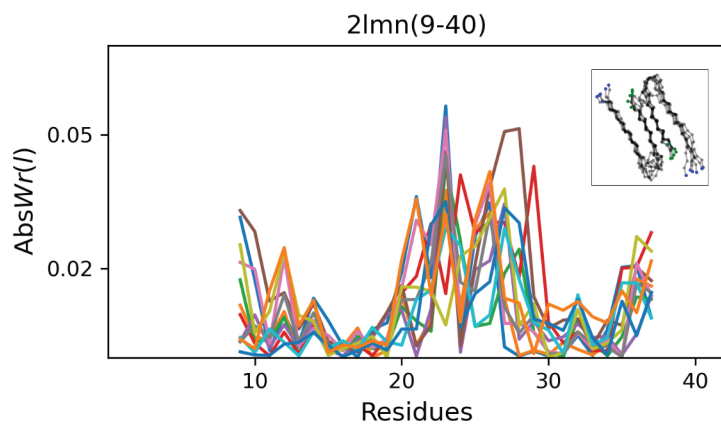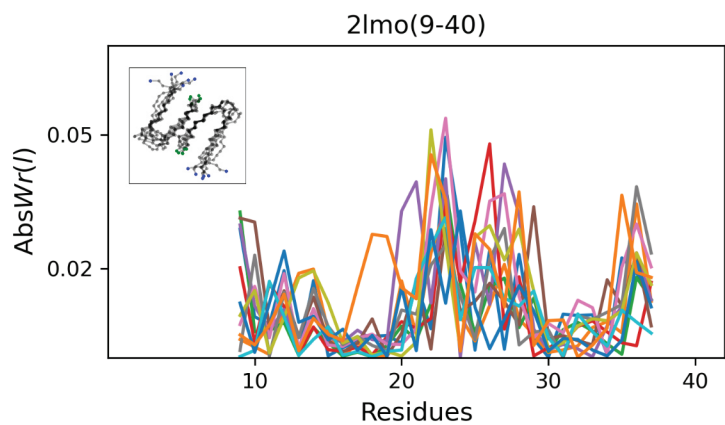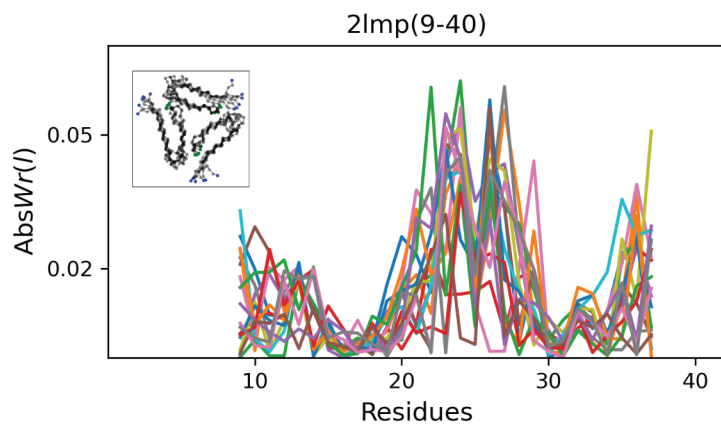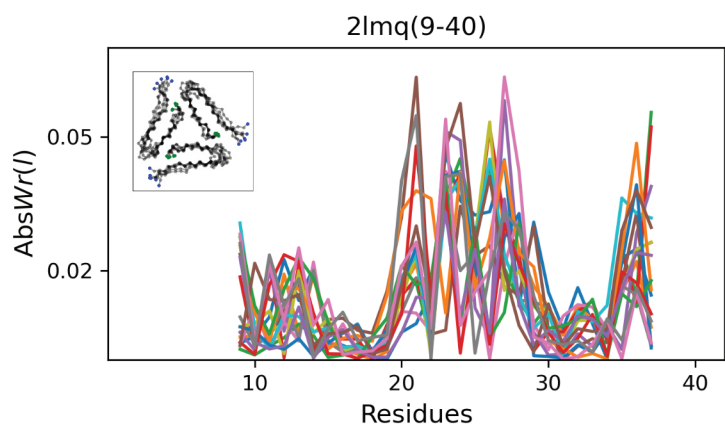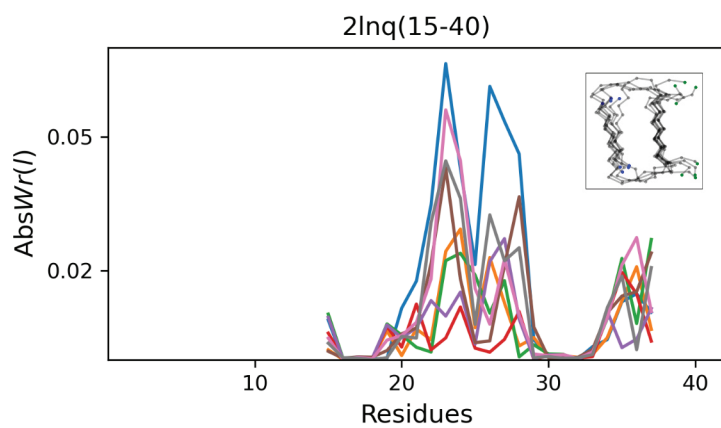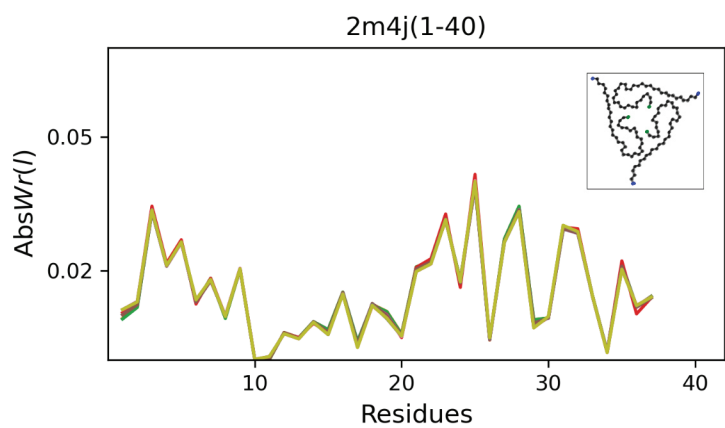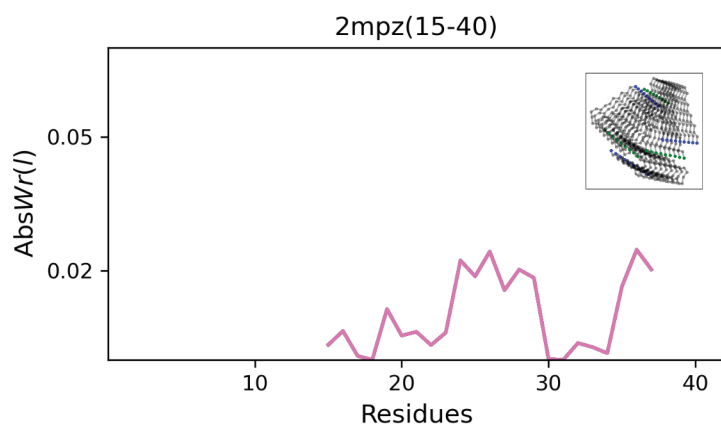

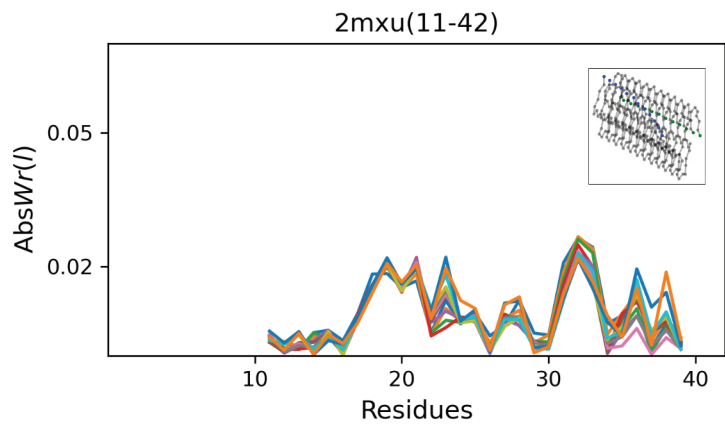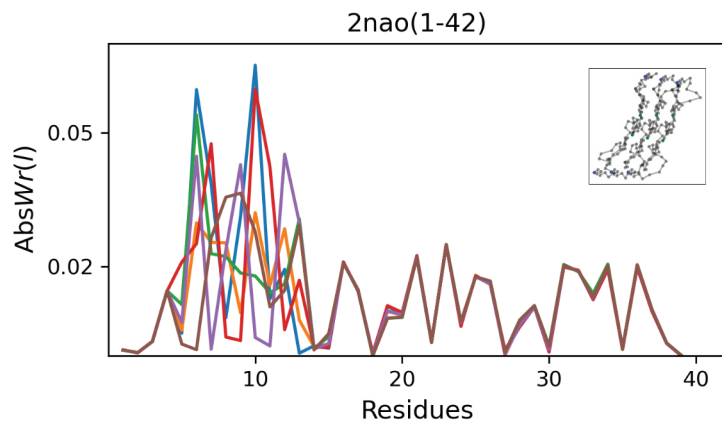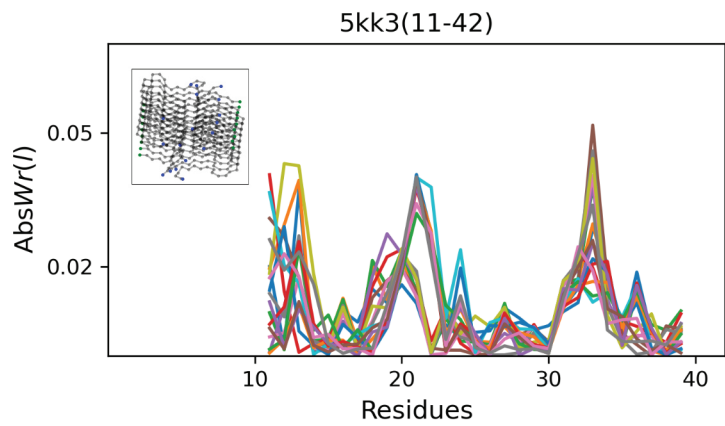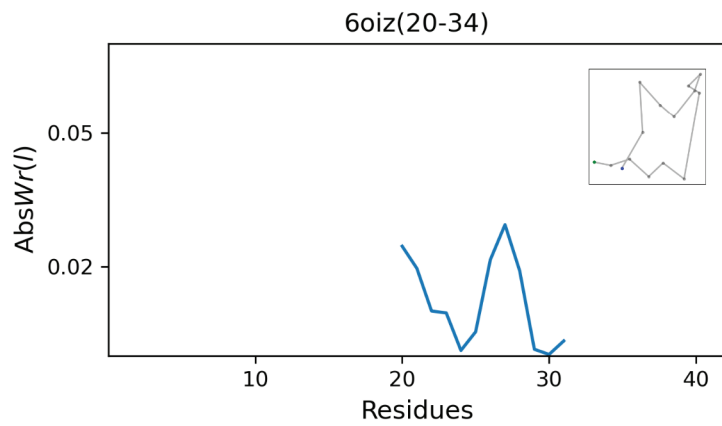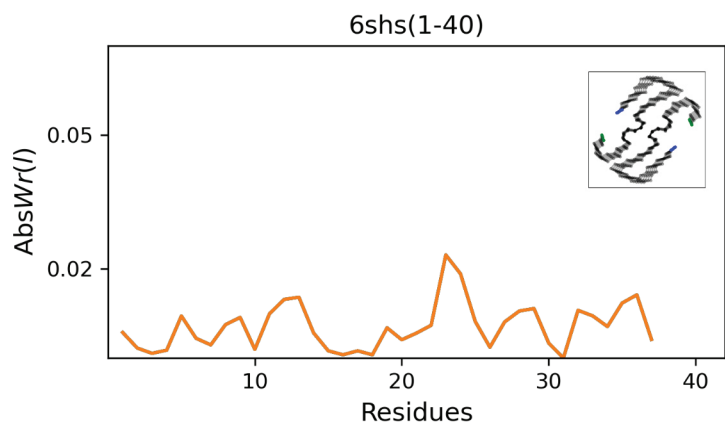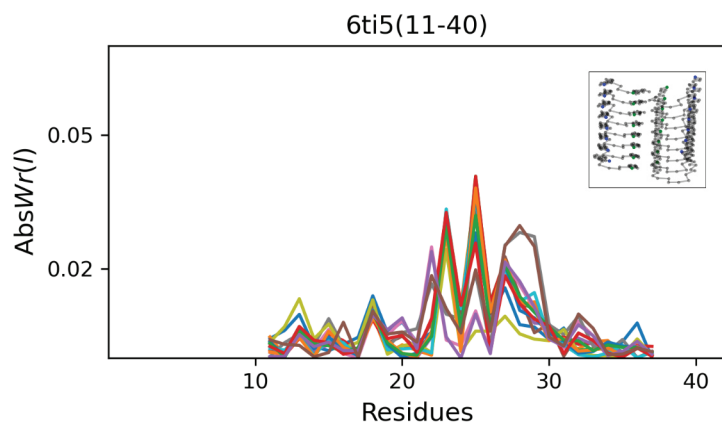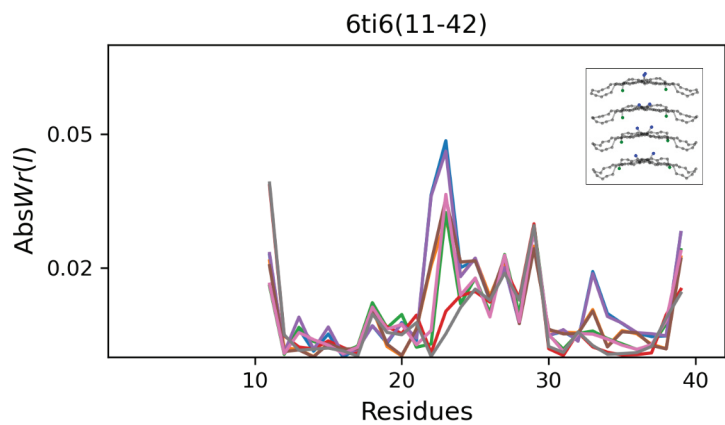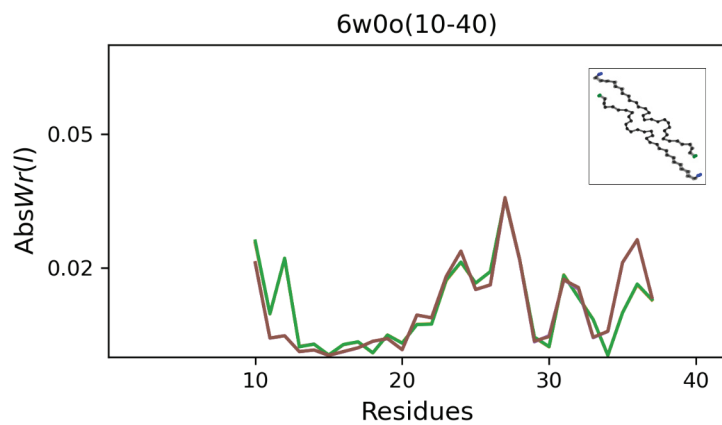

Supplementary Figure S2

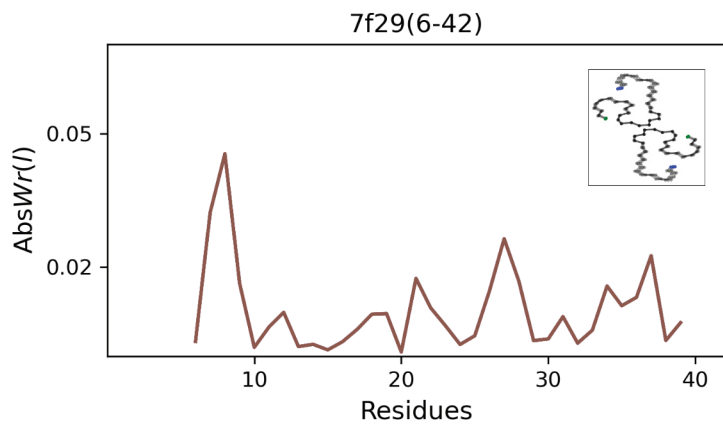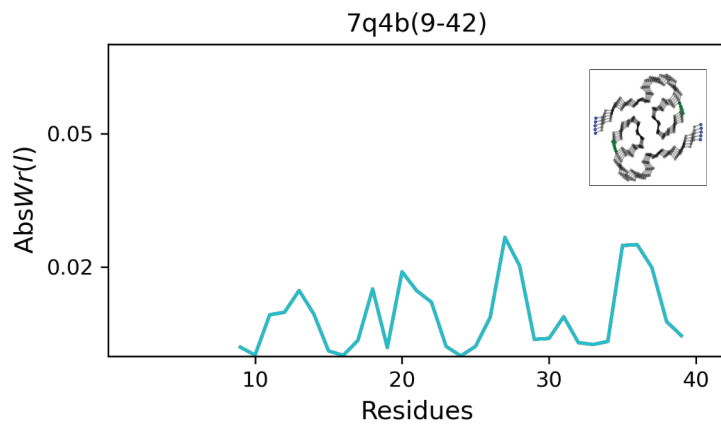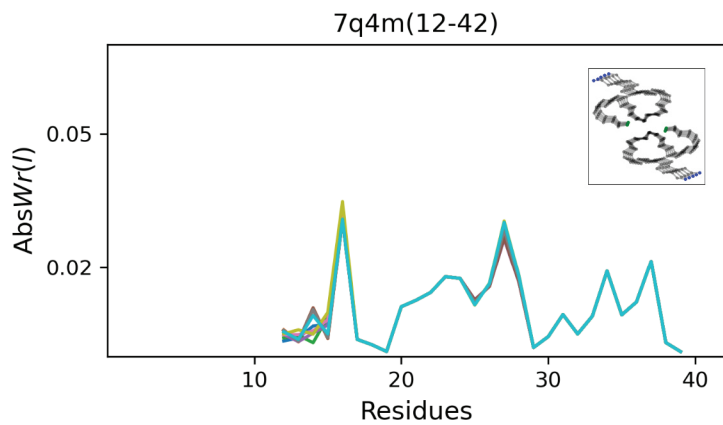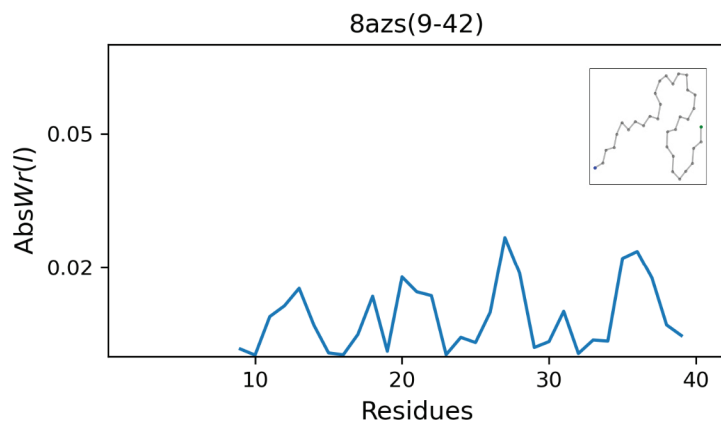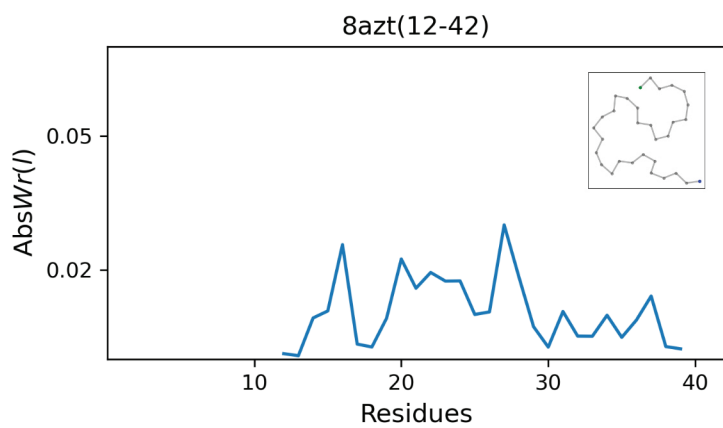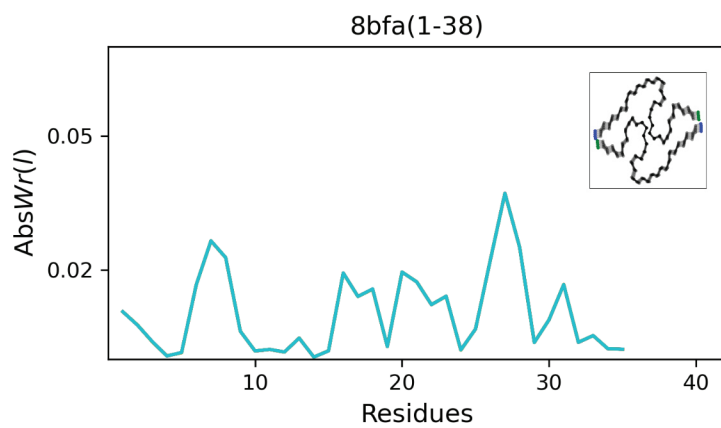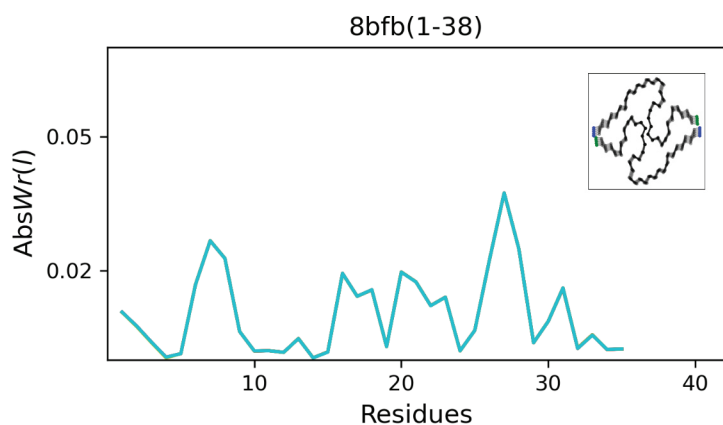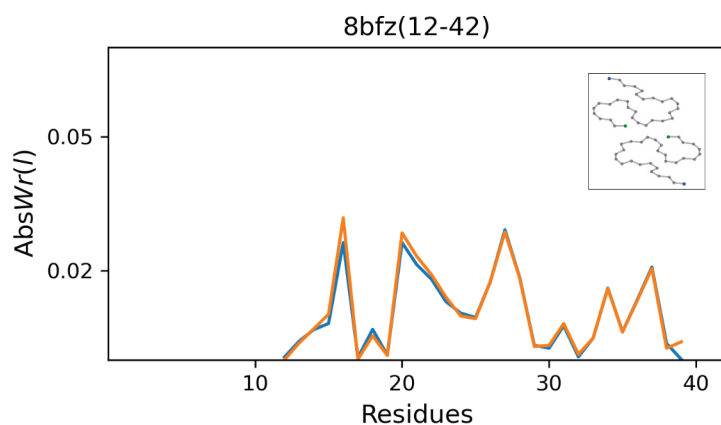

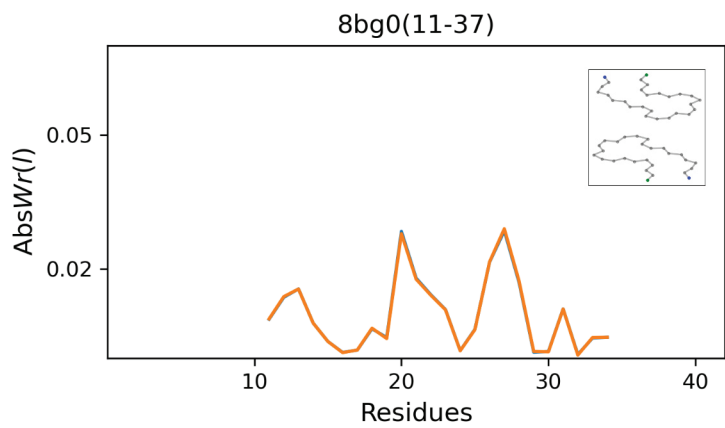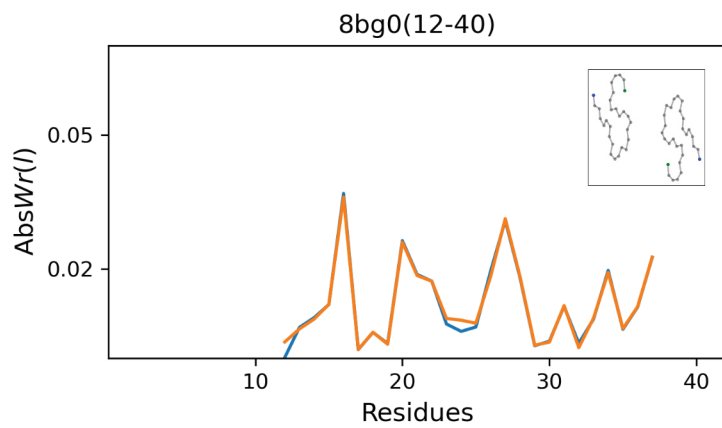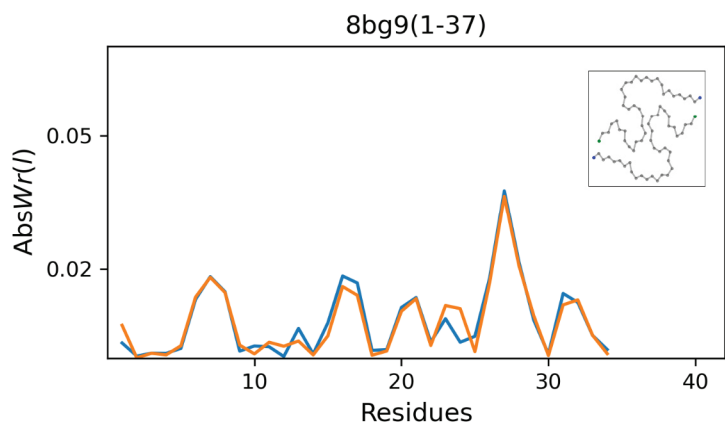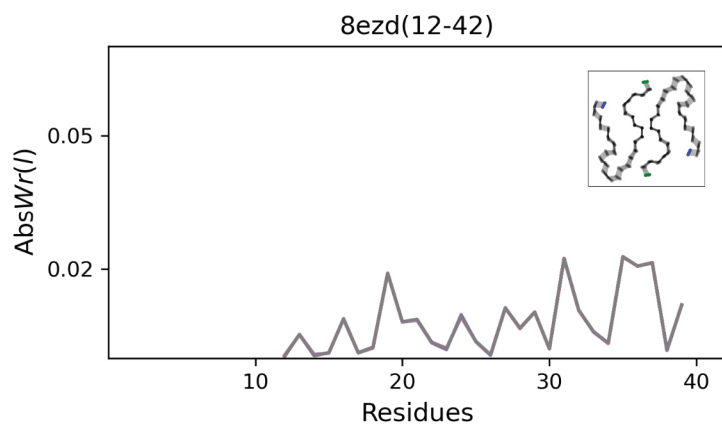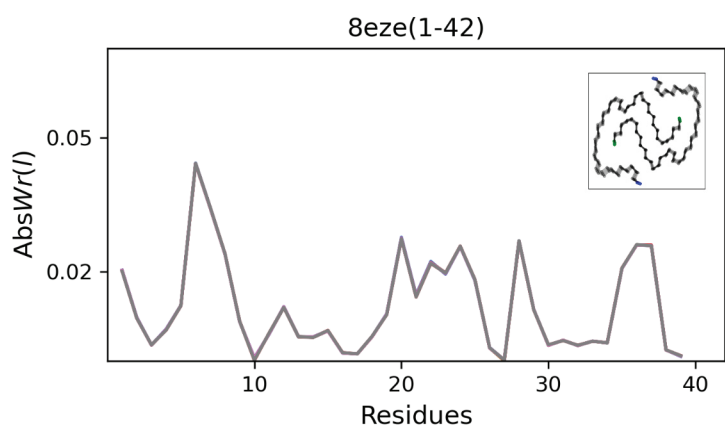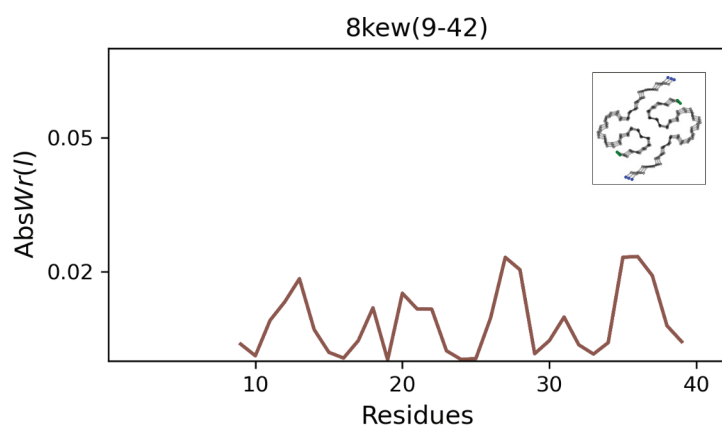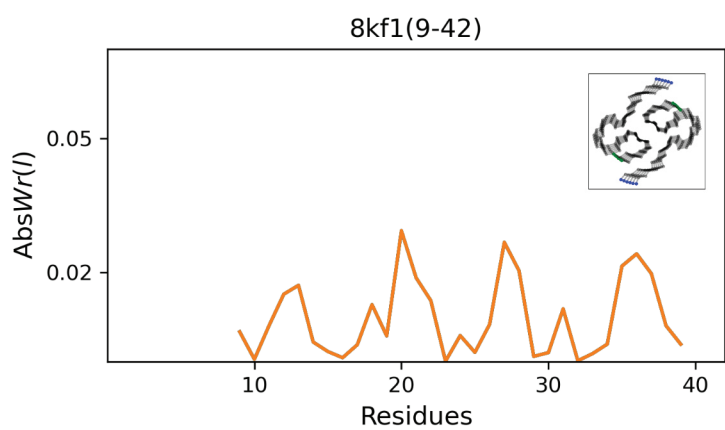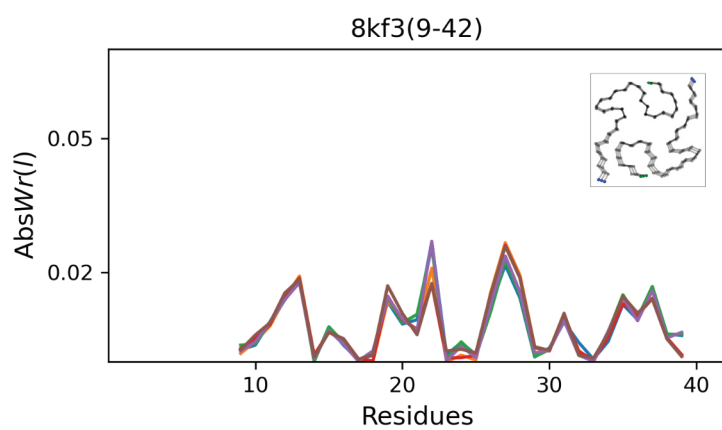

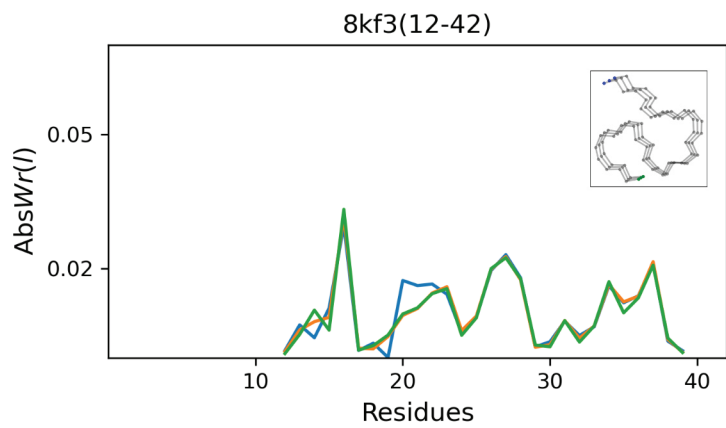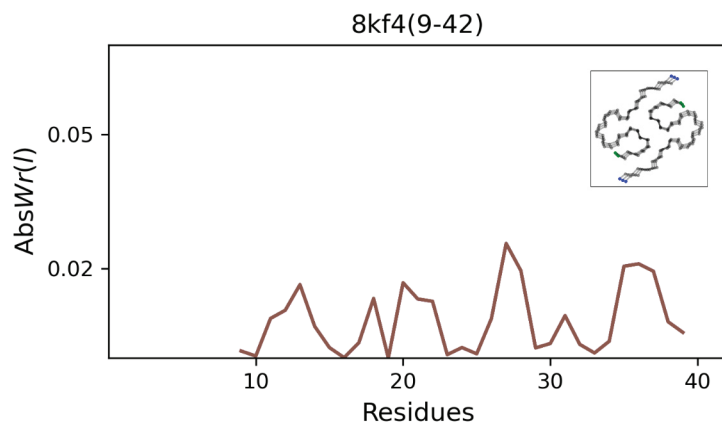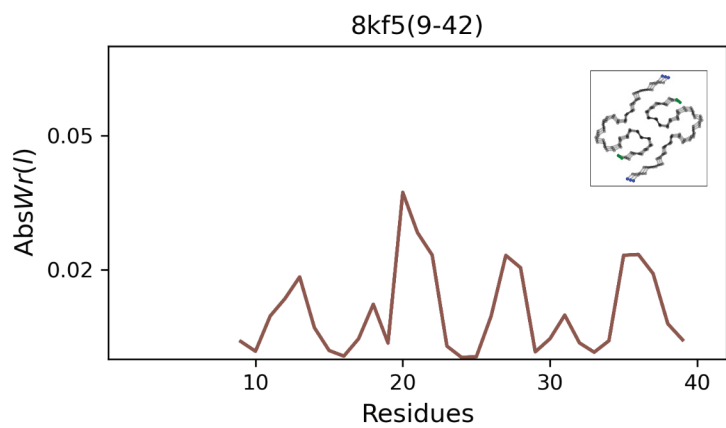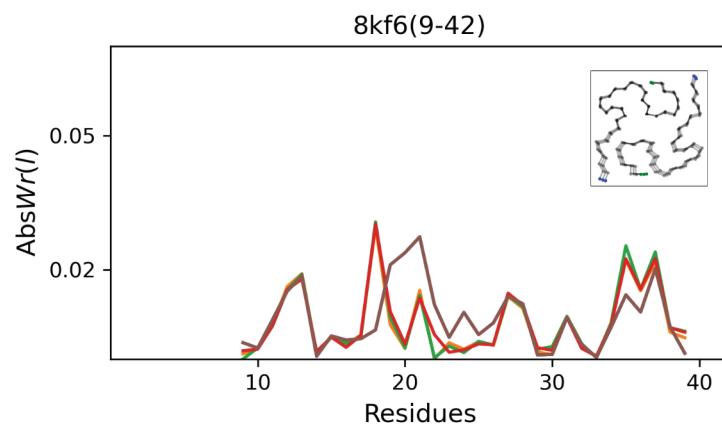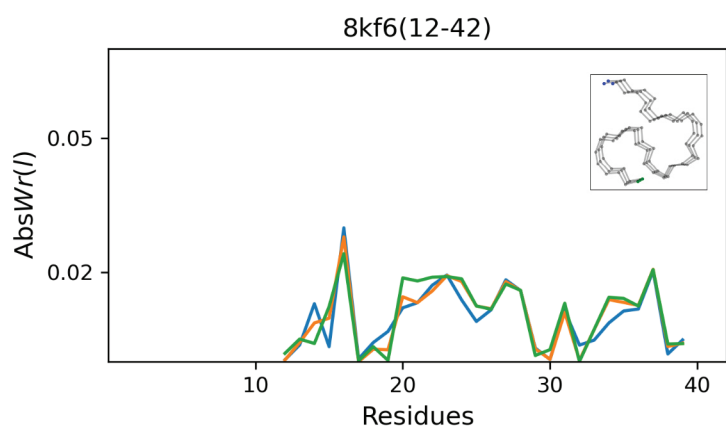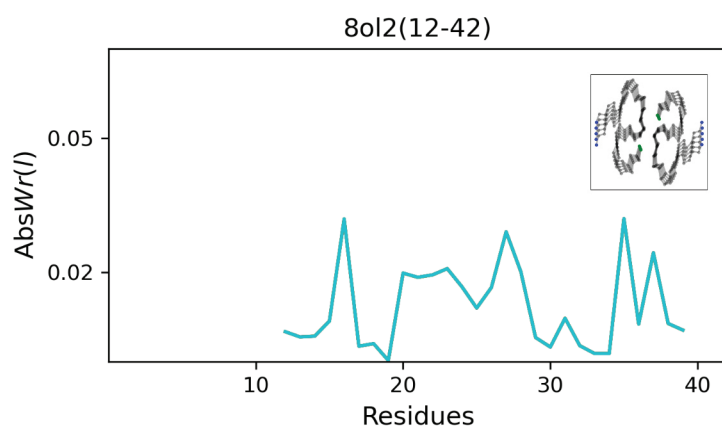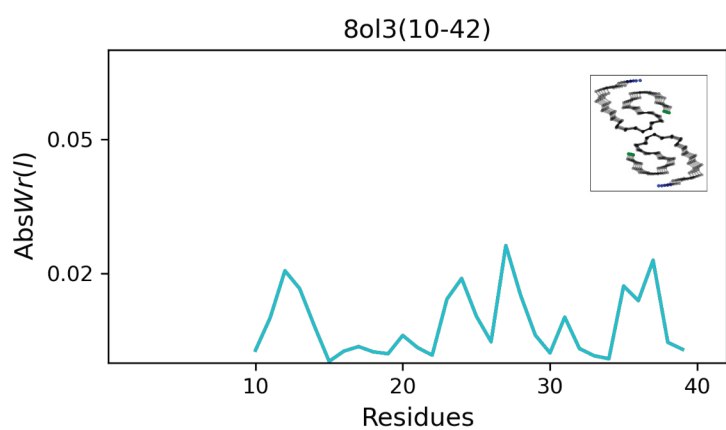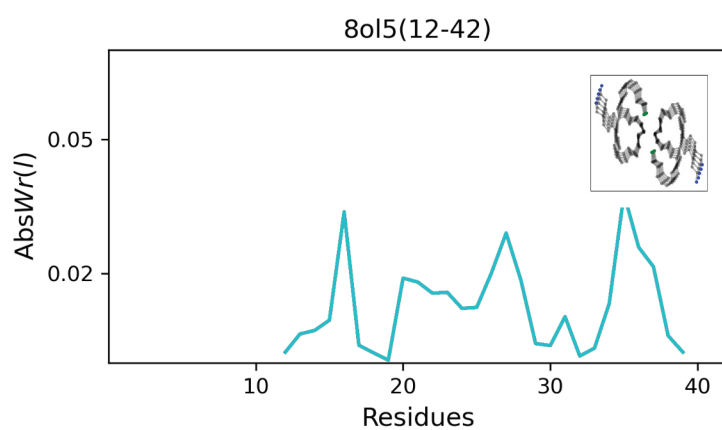

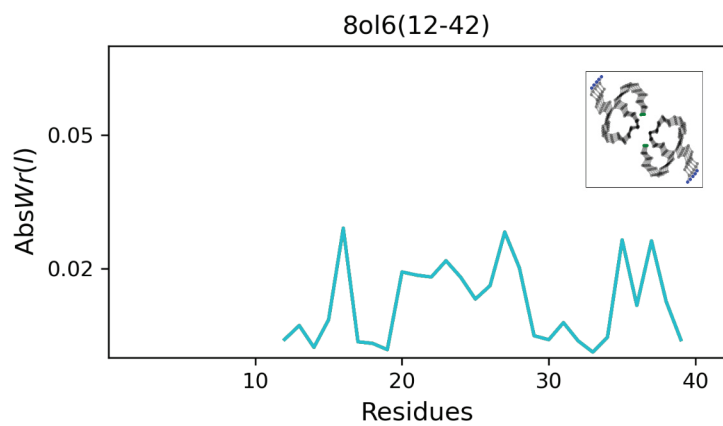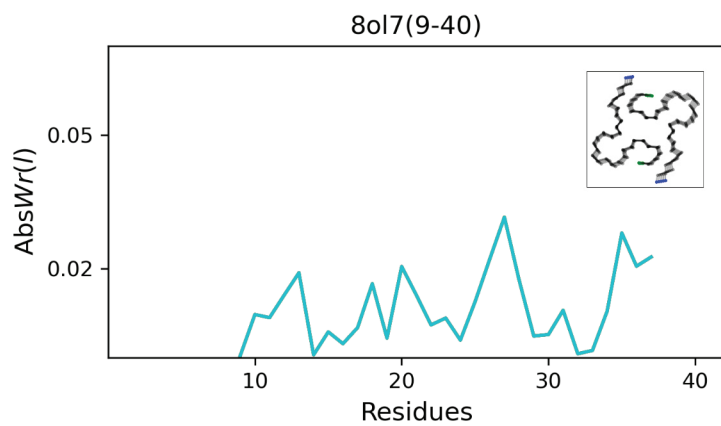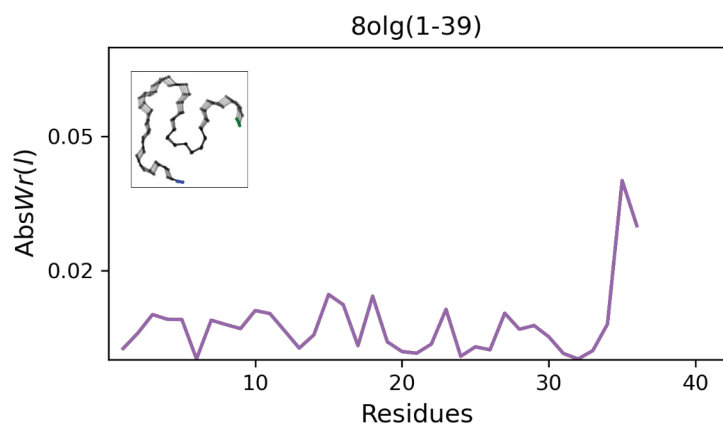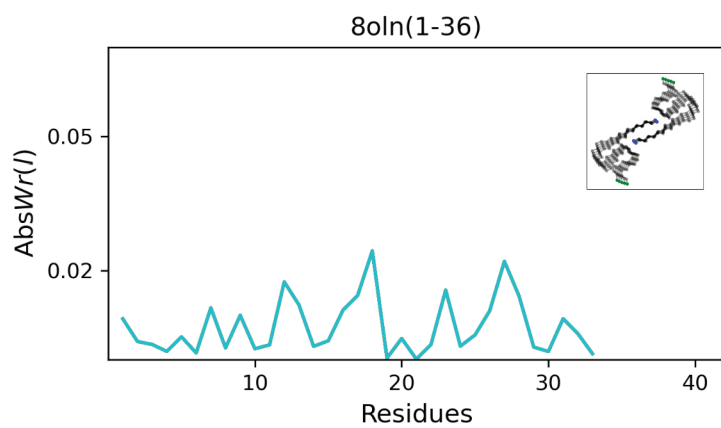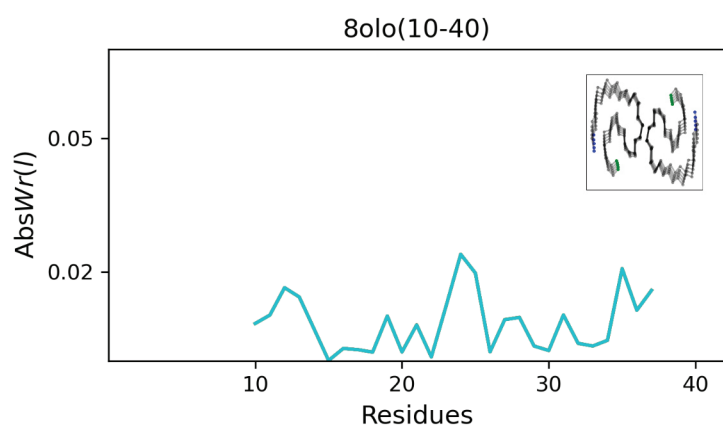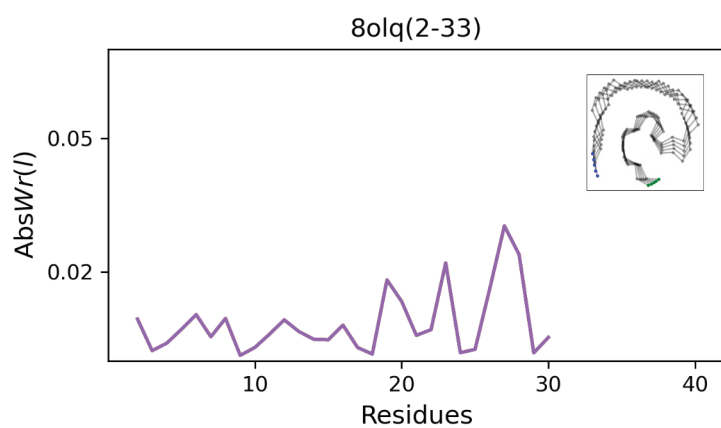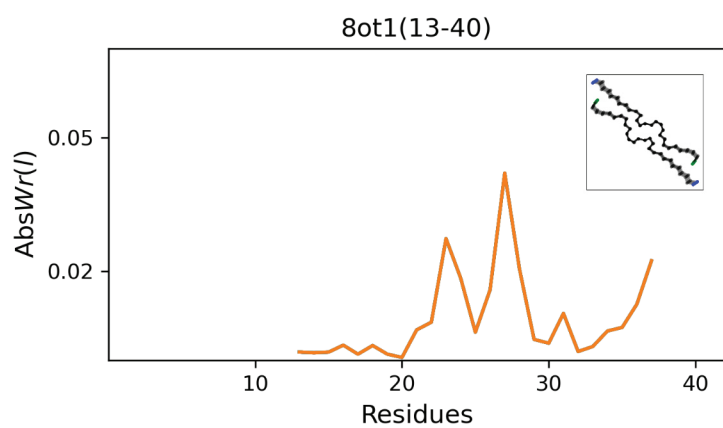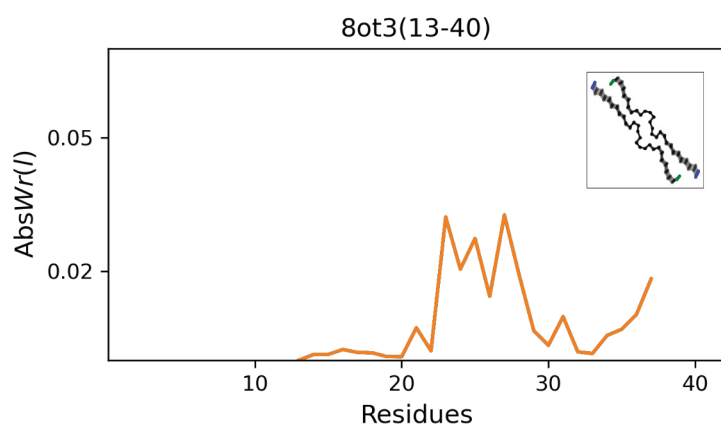

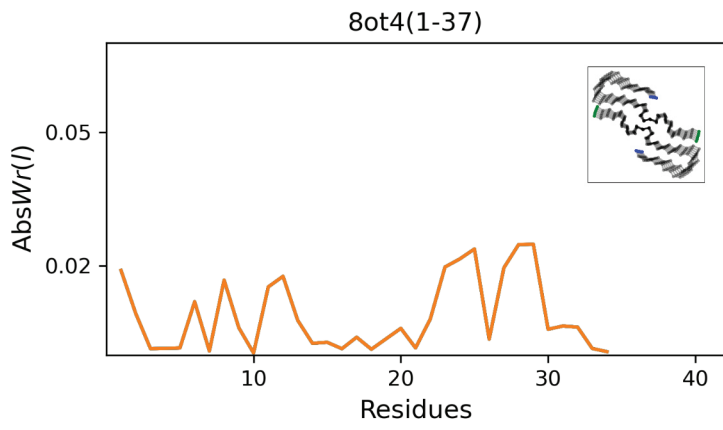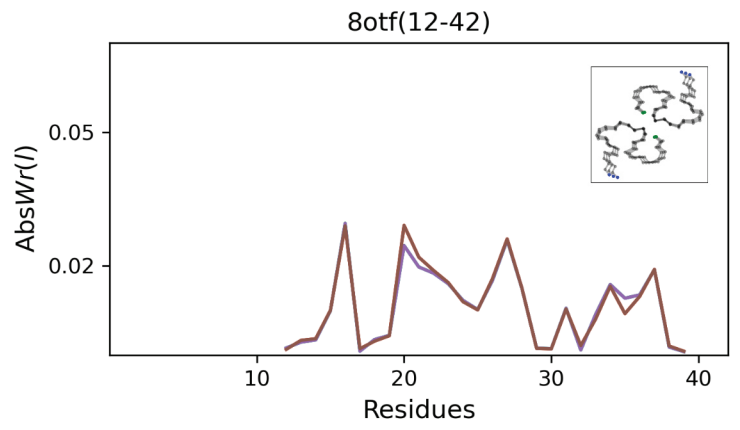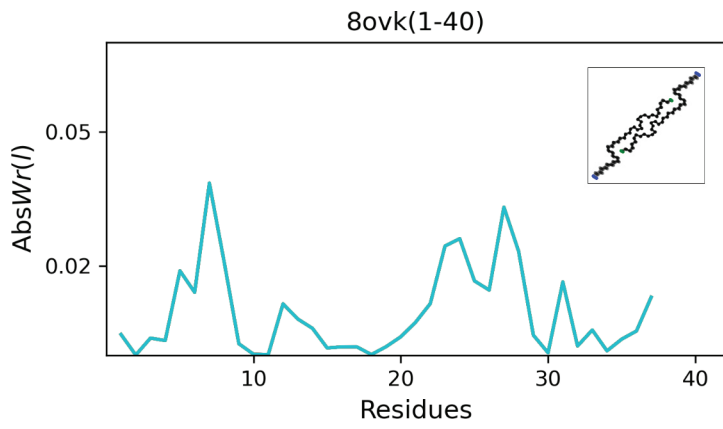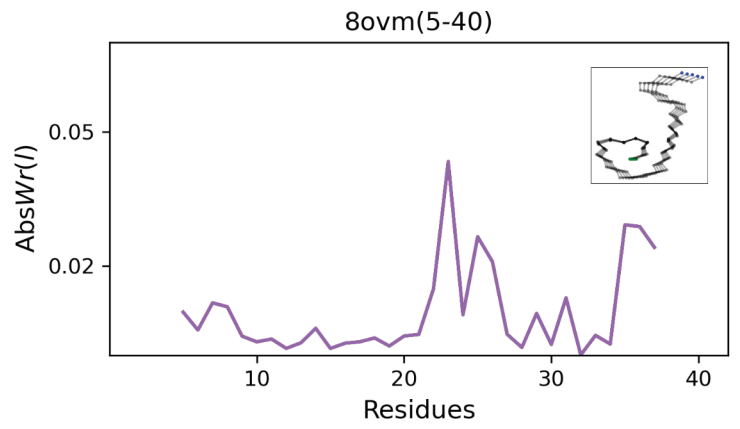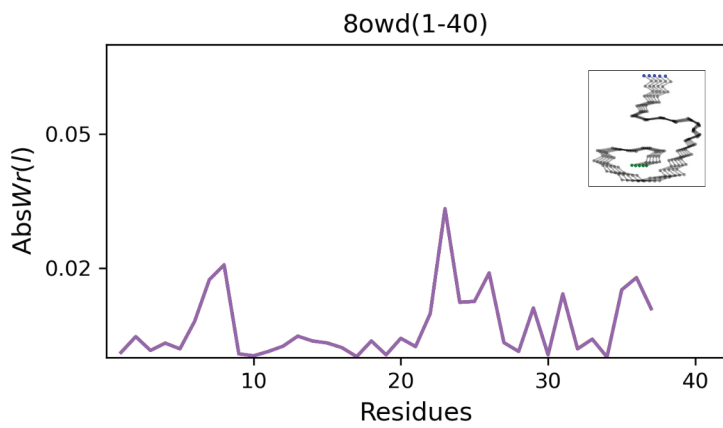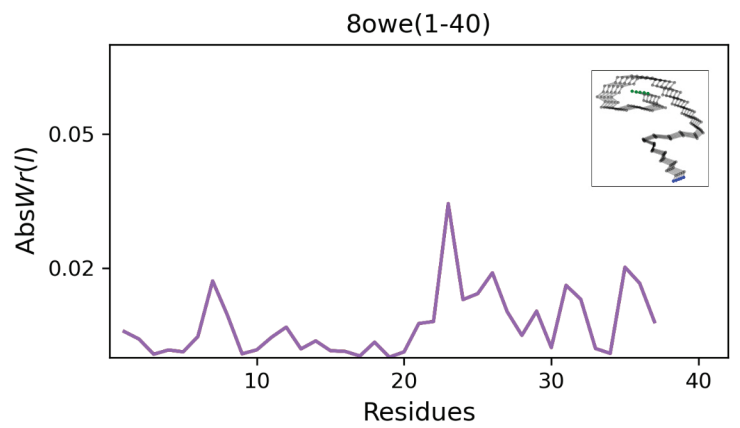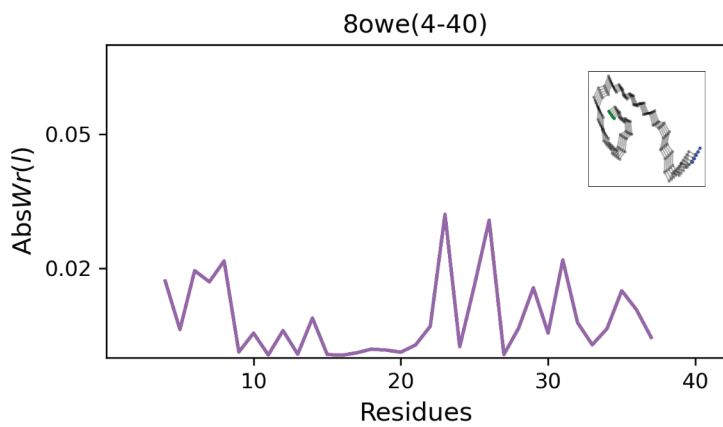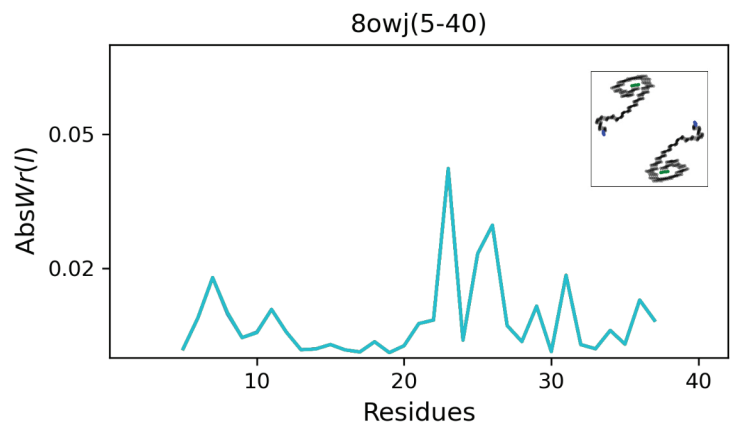

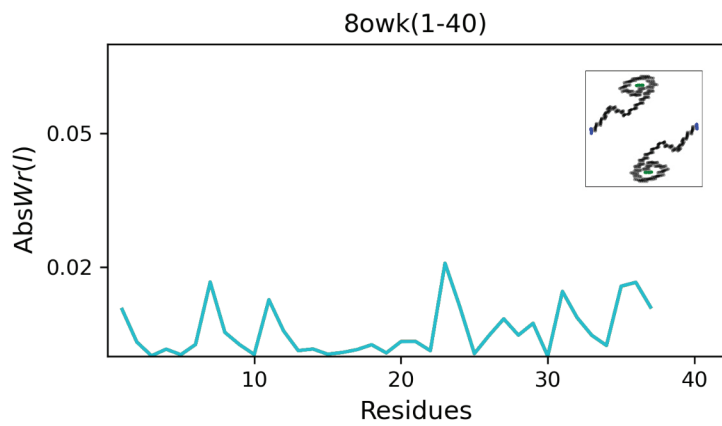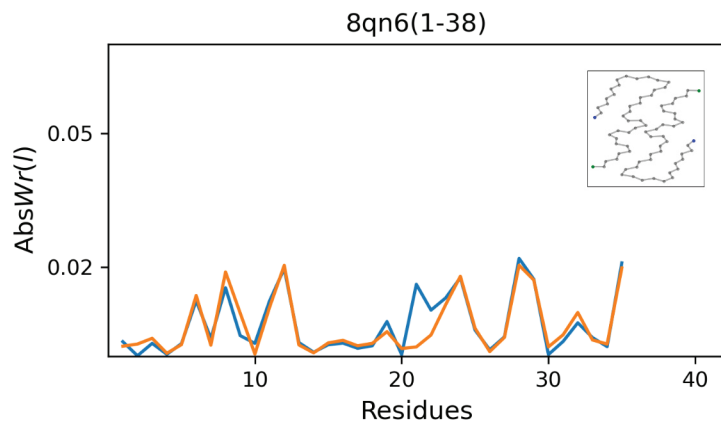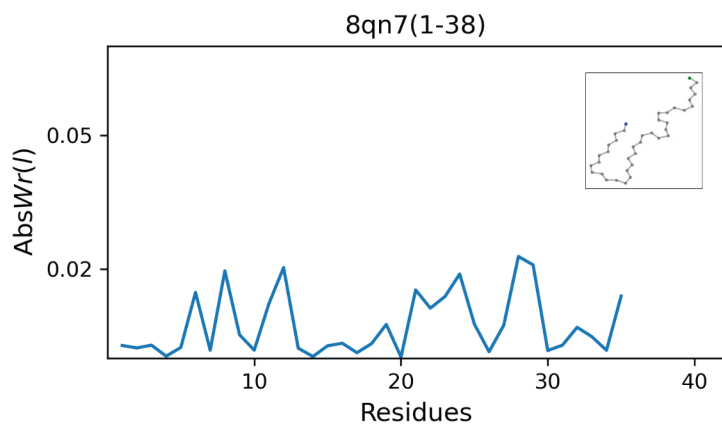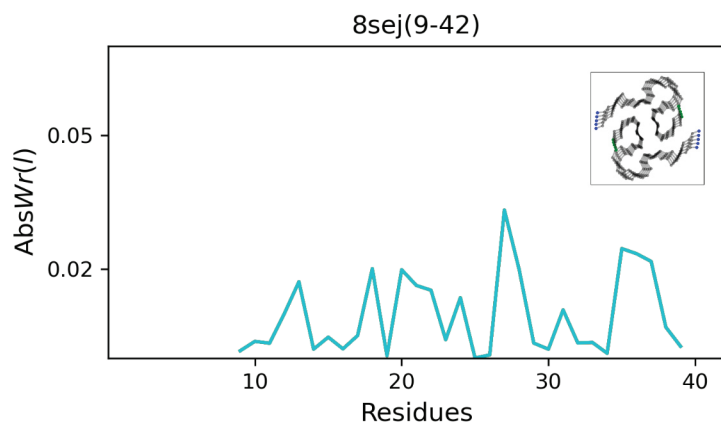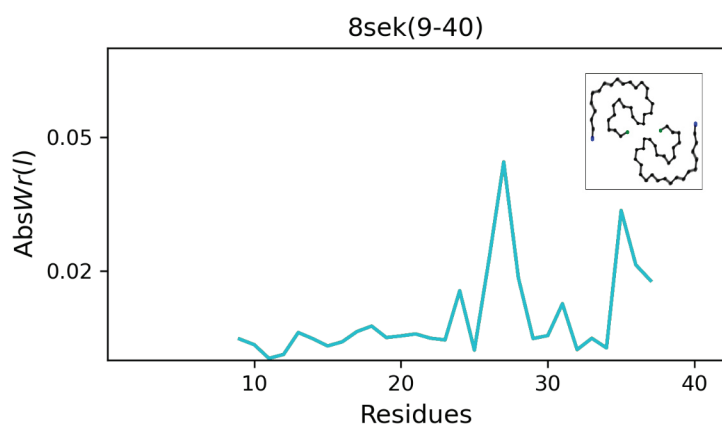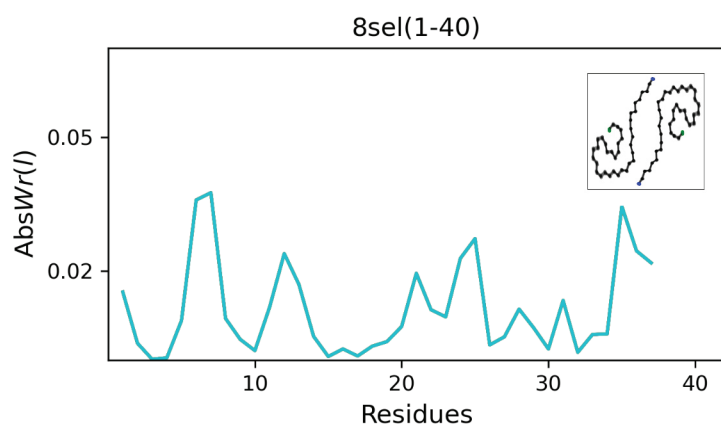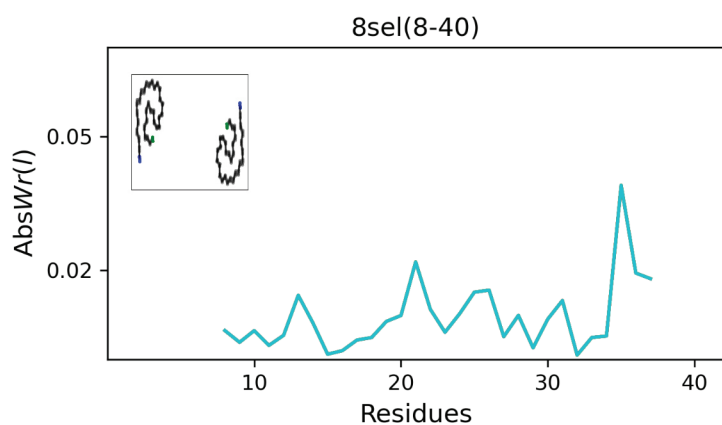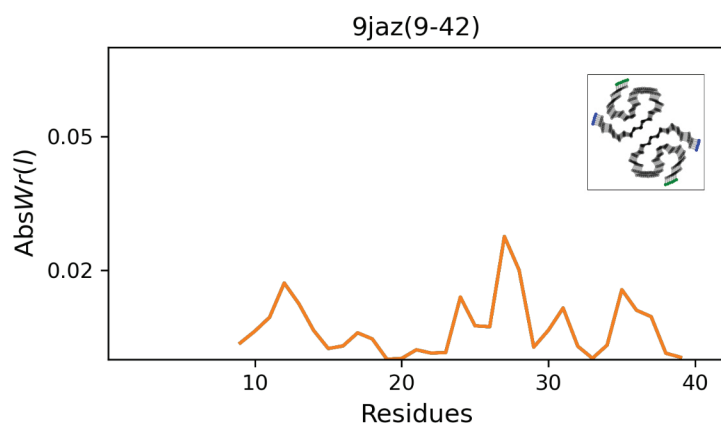

Supplementary Figure S2

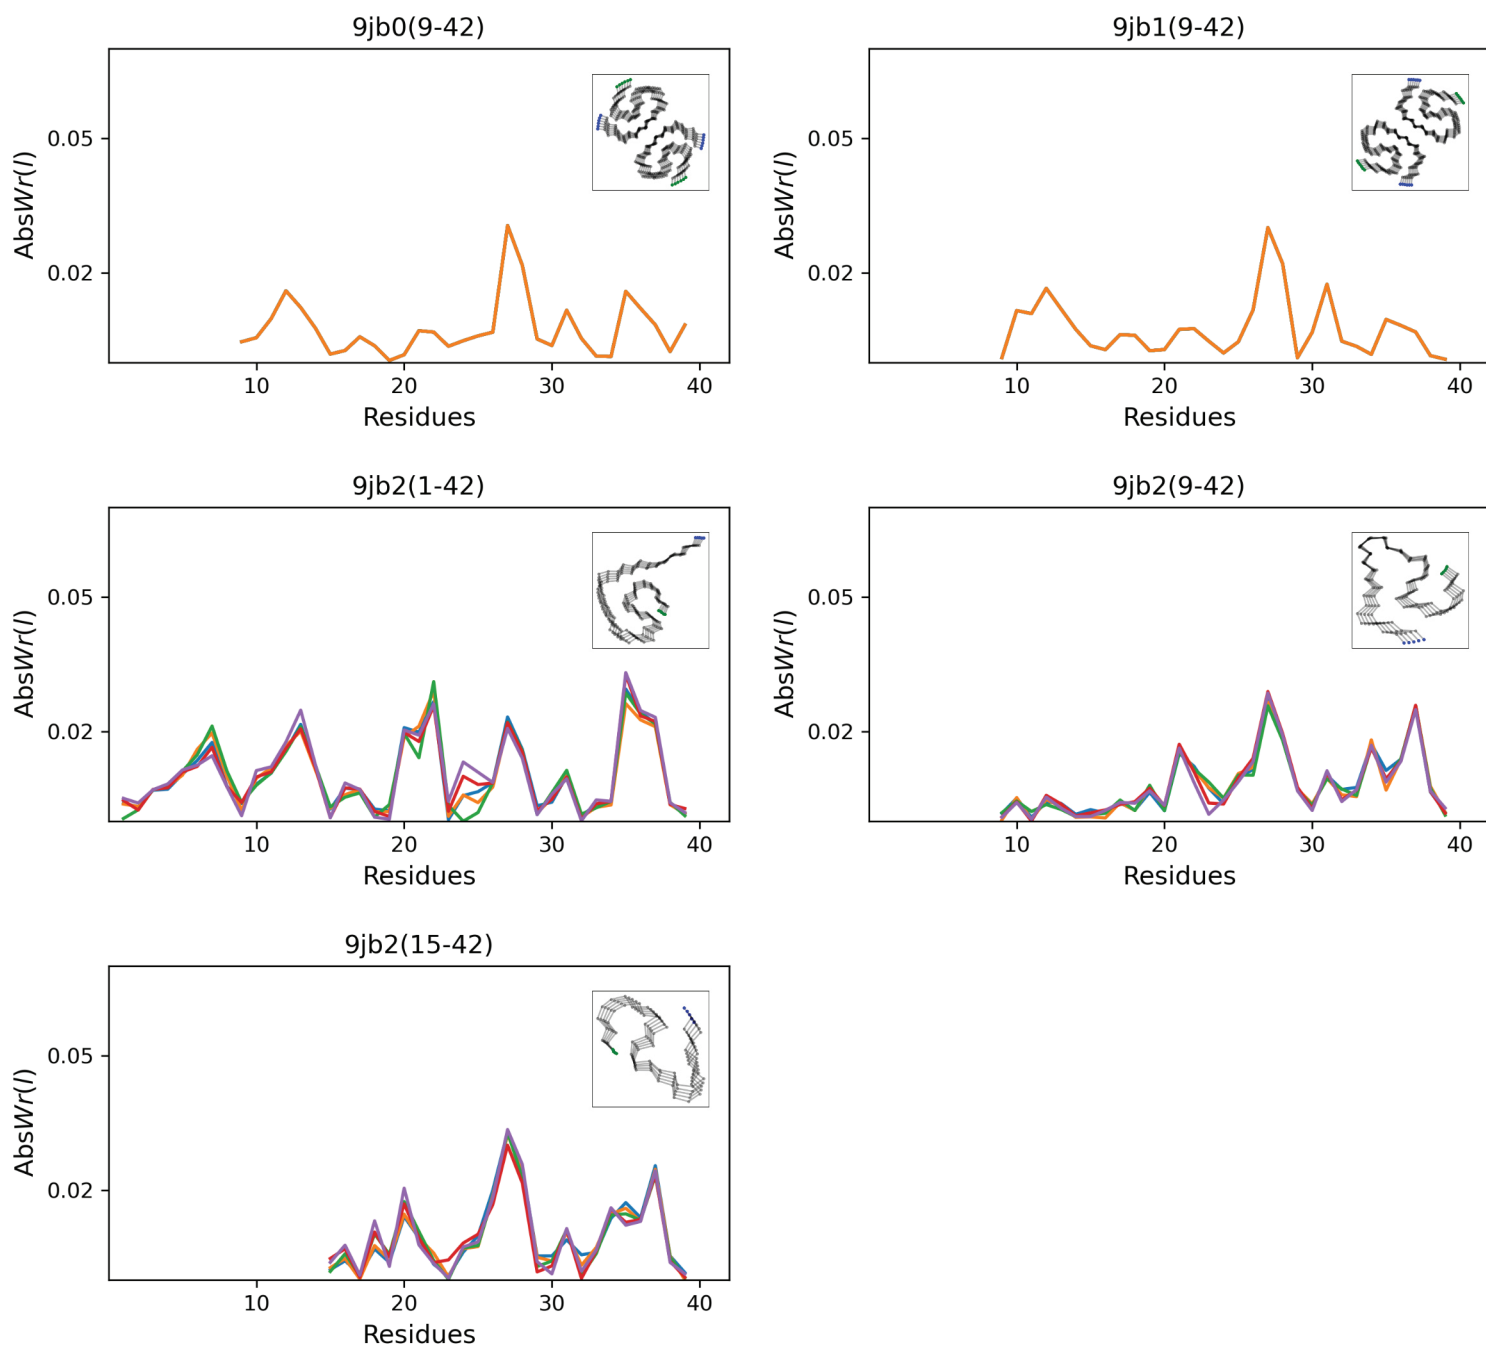

**Figure S2:** The distribution of the absolute local writhe number,  $\text{absWr}(l)$ , along the residues for all the A $\beta$  peptides in 69 fibrils with the corresponding A $\beta$  structures (inset). Data for each Ab peptide in a fibril are drawn in different colors. In the structures, blue and green dots are corresponding to the N- and C-terminal residues, respectively.

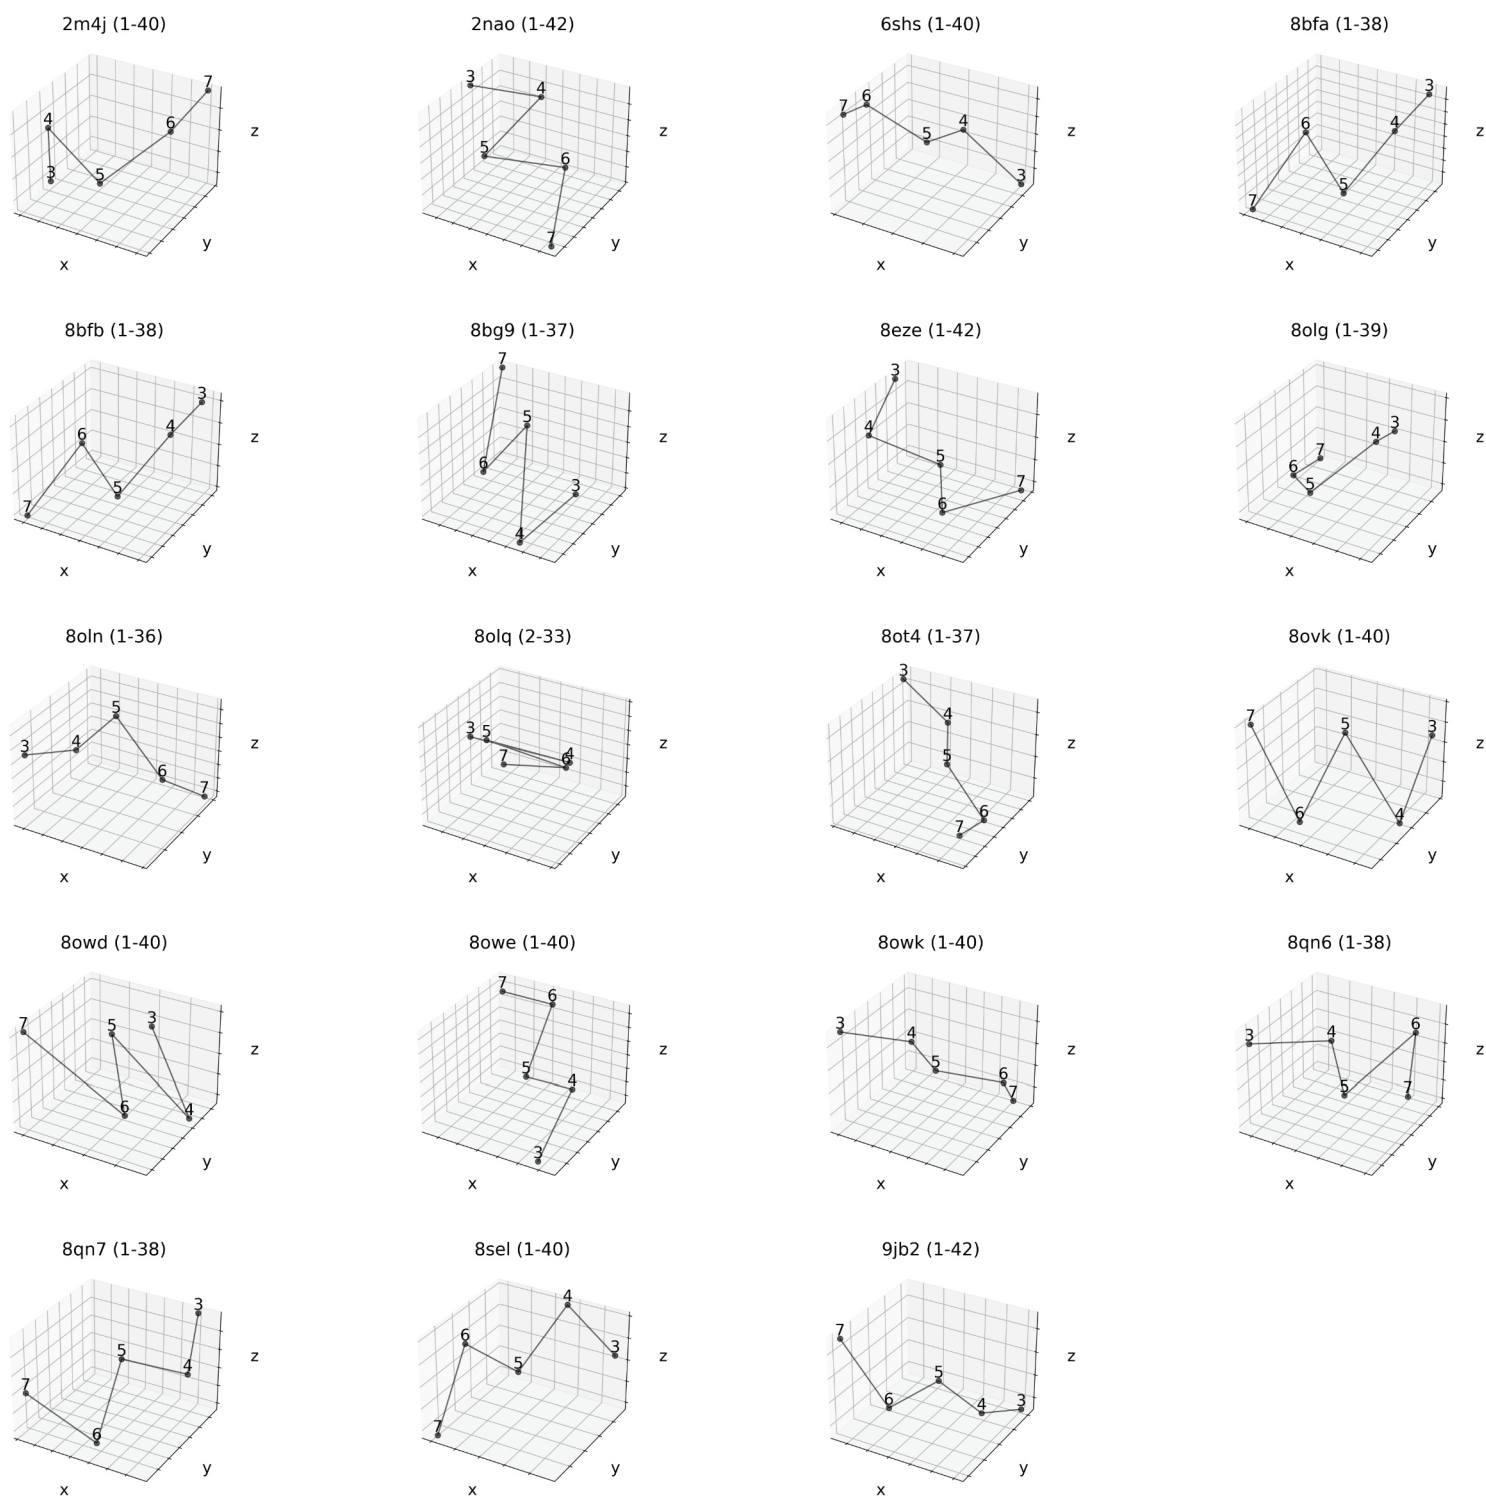

**Figure S3:** Geometries of the epitope by aducanumab (3-7) in 19 different fibrils. The Ab peptides of fibrils are represented as polygonal curves, and black vertices indicate the amino acid residues with the residue numbers.

**a****2beg (17-42): Lecanemab (21-29) epitope**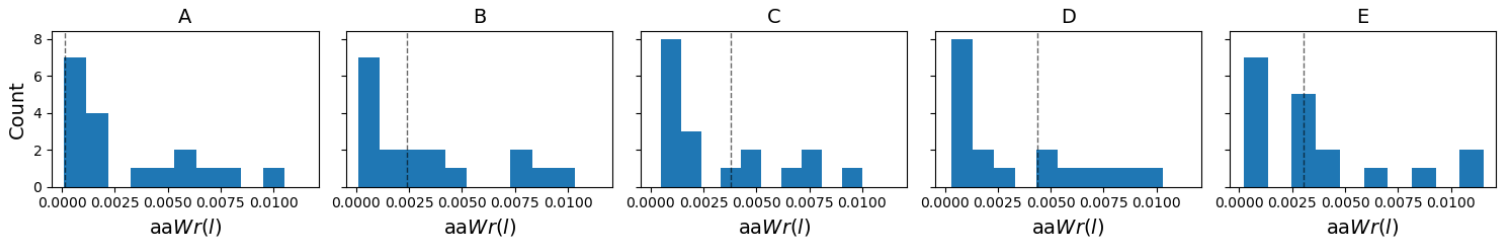**2lmo (9-40): Lecanemab (21-29) epitope**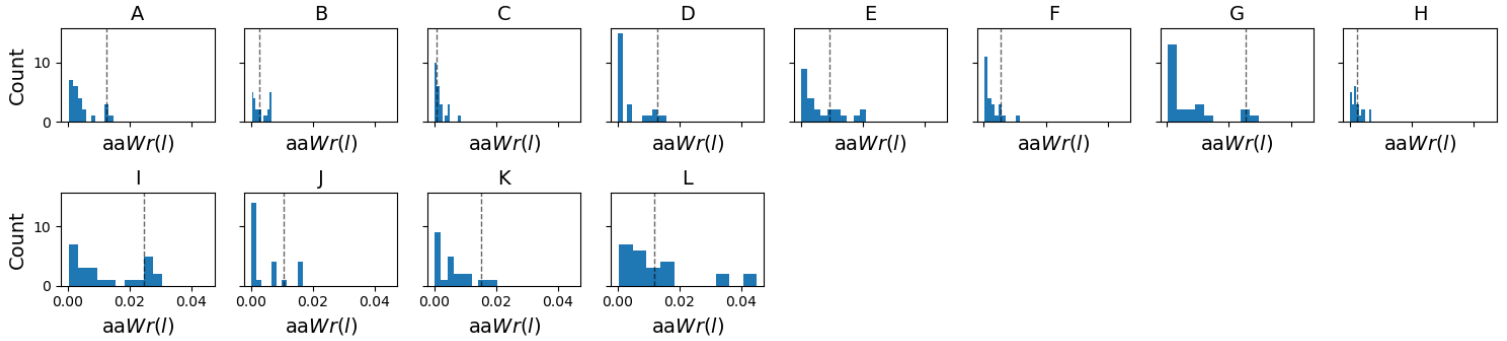**2lmp (9-40): Lecanemab (21-29) epitope**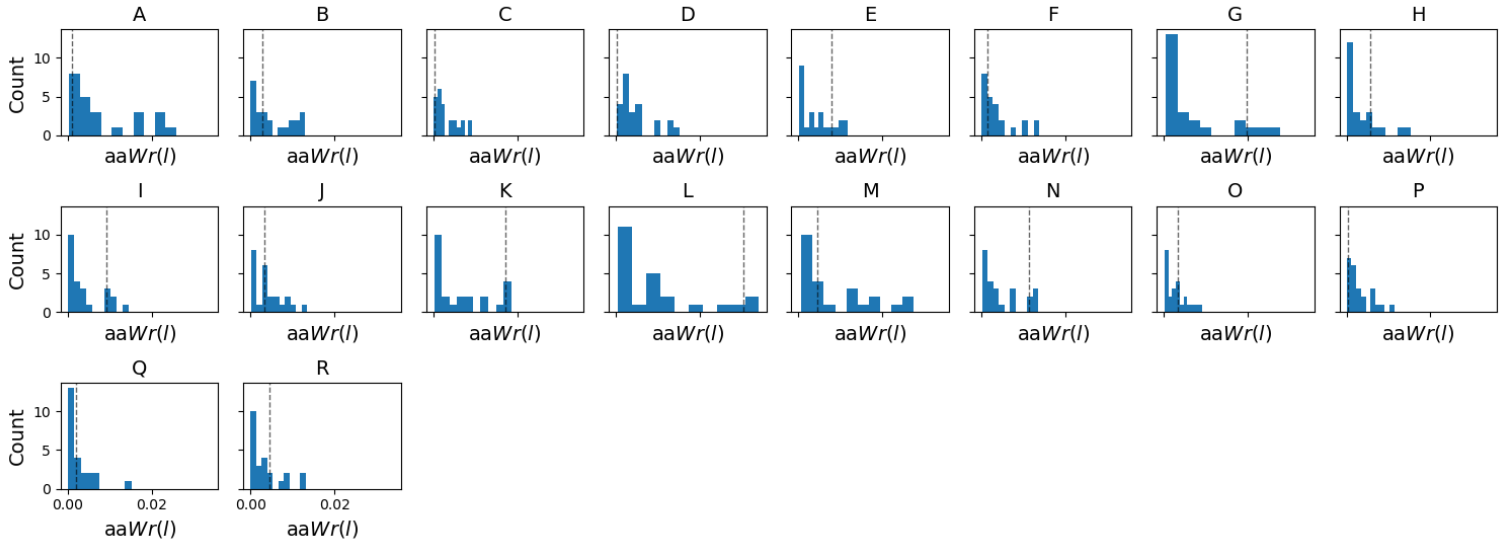

### 2Imq (9-40): Lecanemab (21-29) epitope

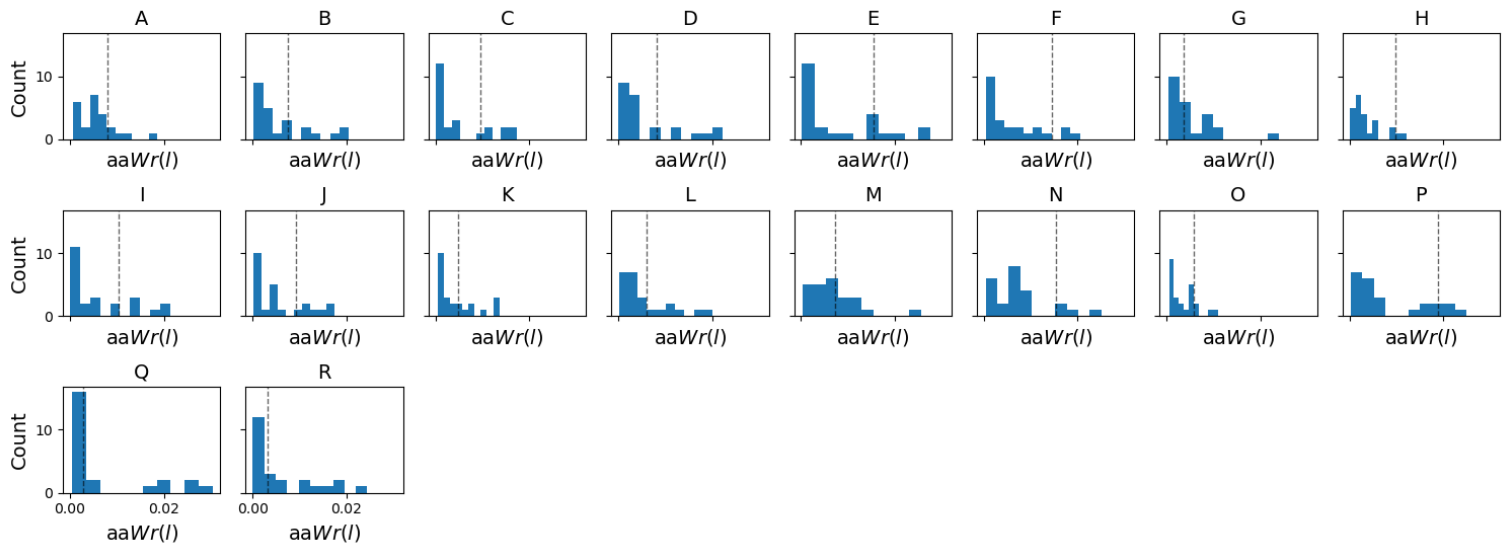

### 2Inq (15-40): Lecanemab (21-29) epitope

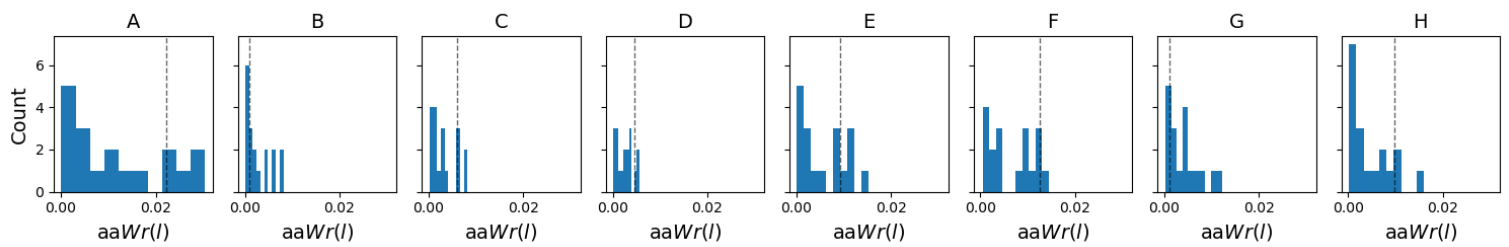

### 2m4j (1-40): Lecanemab (21-29) epitope

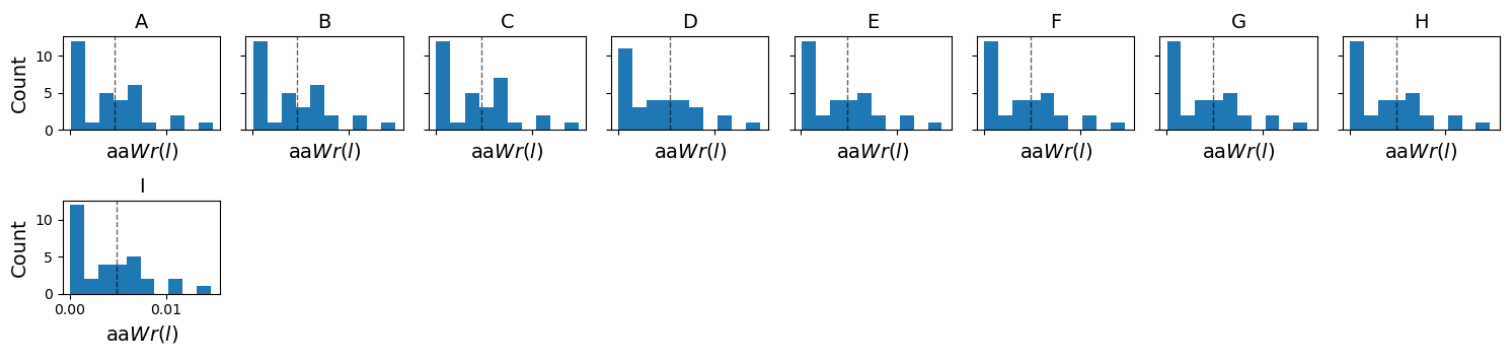

2mpz (15-40): Lecanemab (21-29) epitope

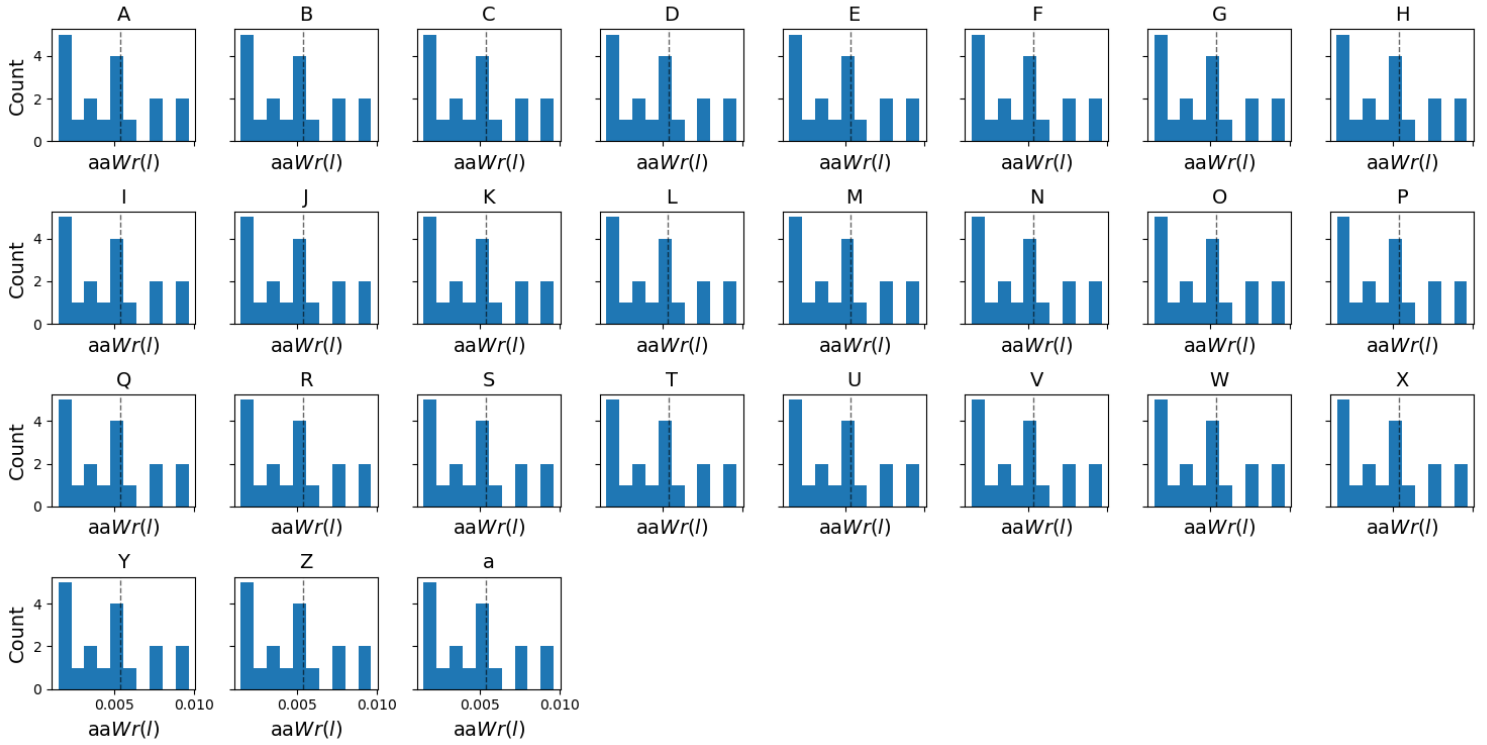

2mxu (11-42): Lecanemab (21-29) epitope

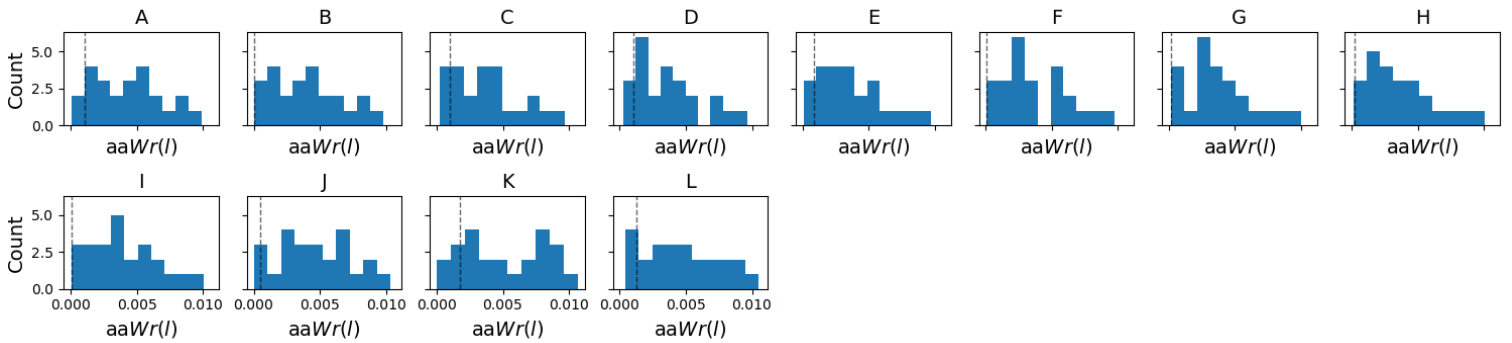

2nao (1-42): Lecanemab (21-29) epitope

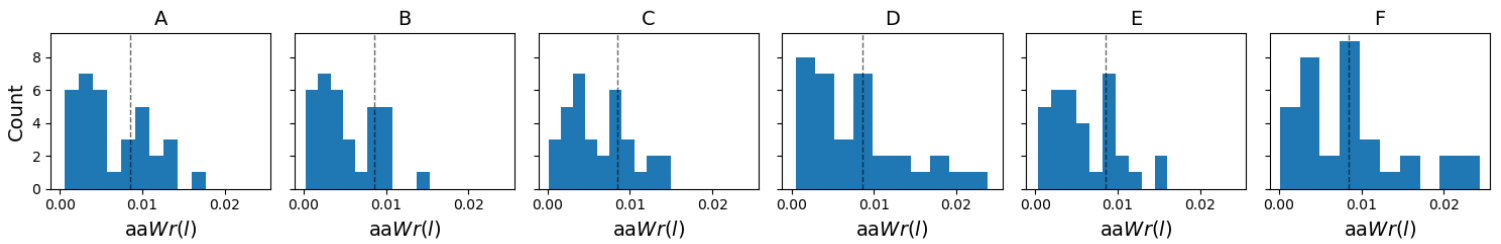

5kk3 (11-42): Lecanemab (21-29) epitope

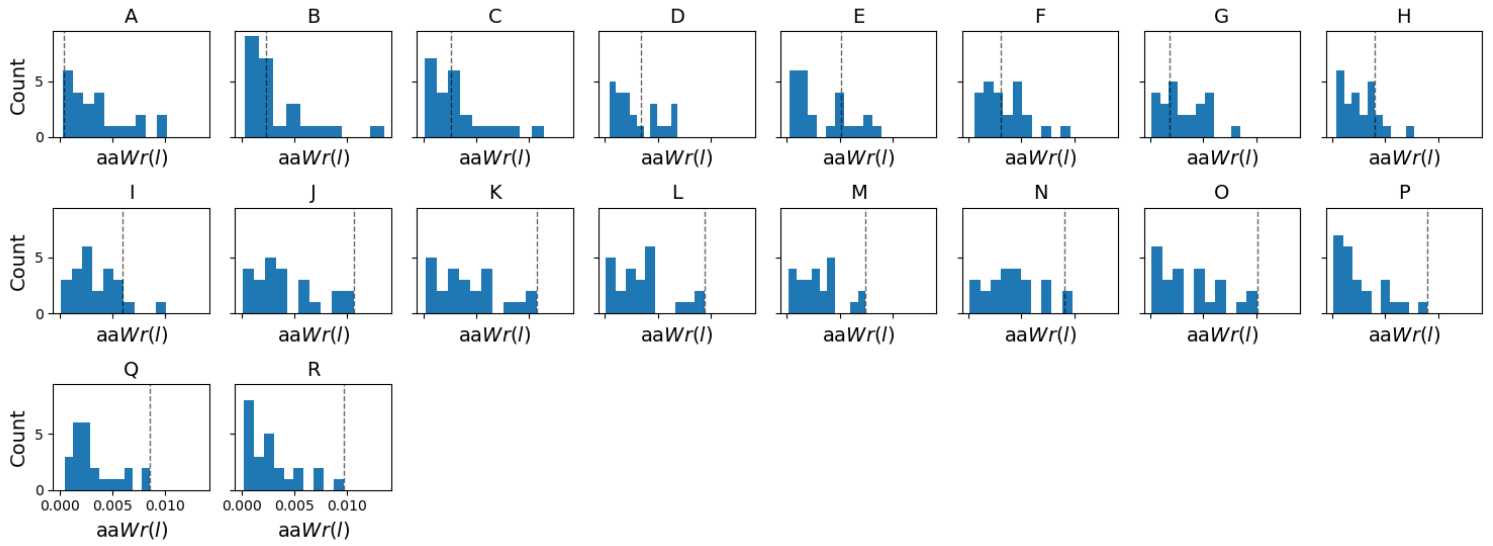

6oiz (20-34): lecanemab (21-29) epitope

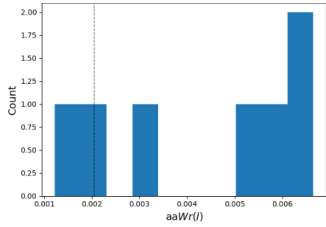

6shs (1-40): Lecanemab (21-29) epitope

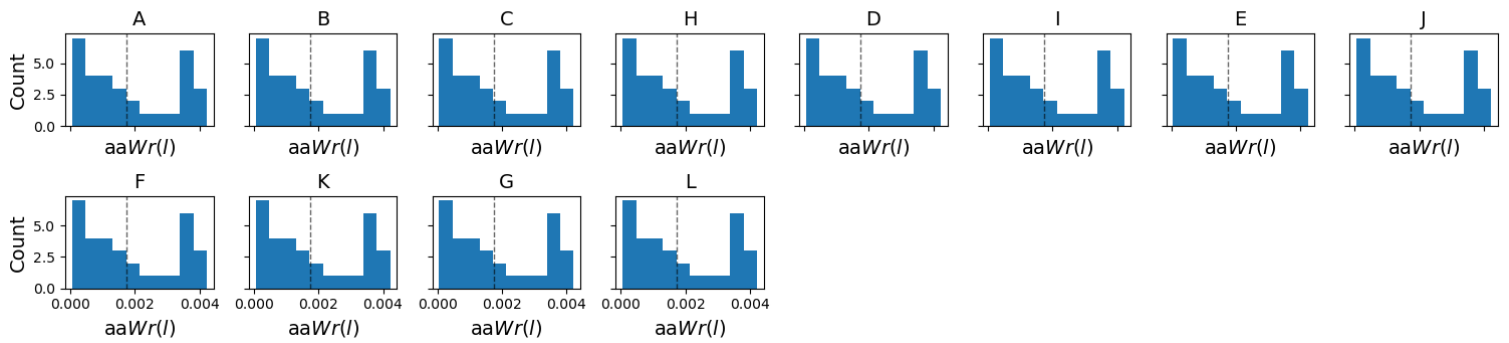

6ti5 (11-40): Lecanemab (21-29) epitope

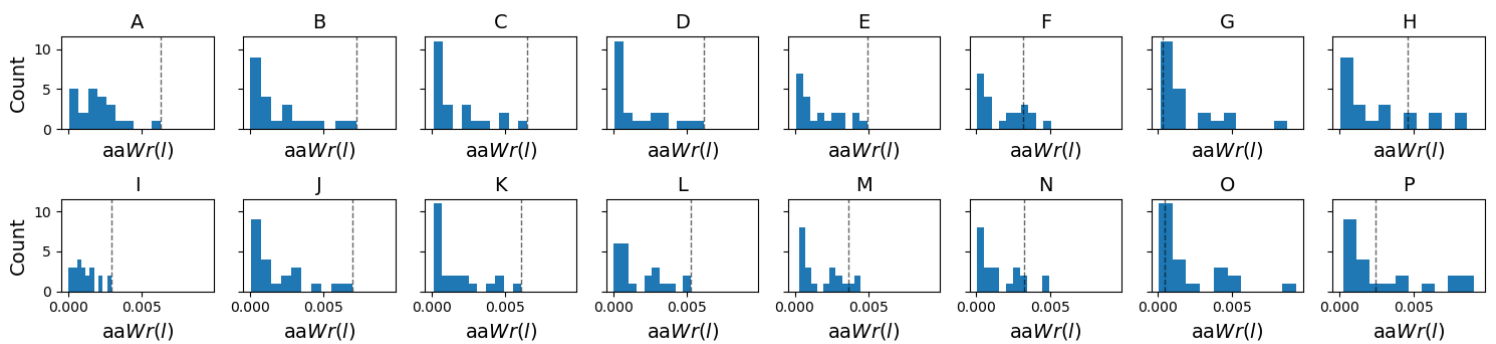

6ti6 (11-42): Lecanemab (21-29) epitope

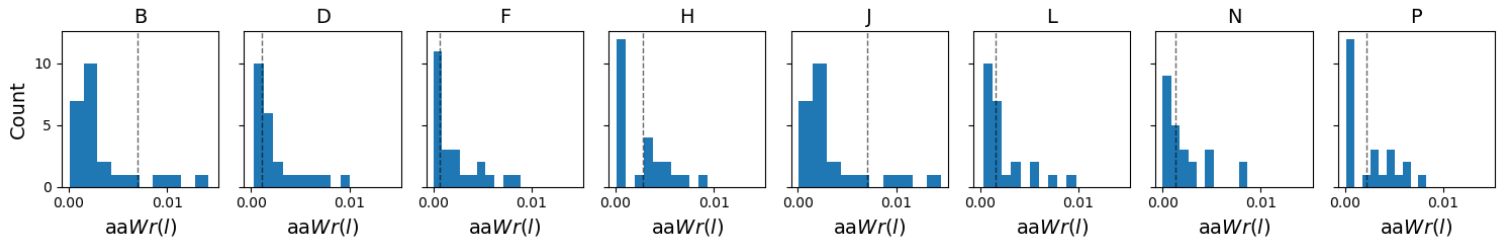

6w0o (10-40): Lecanemab (21-29) epitope

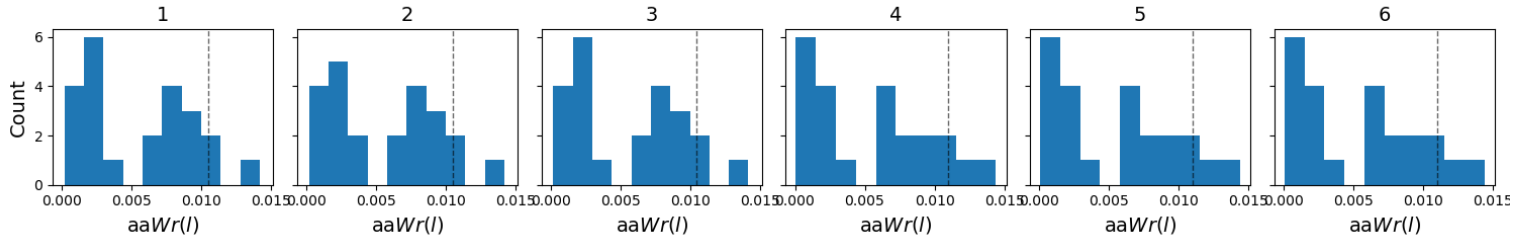

7f29 (6-42): Lecanemab (21-29) epitope

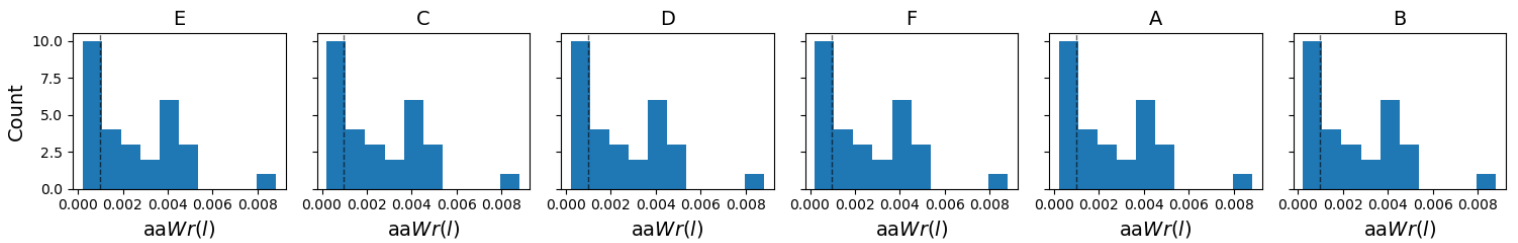

7q4b (9-42): Lecanemab (21-29) epitope

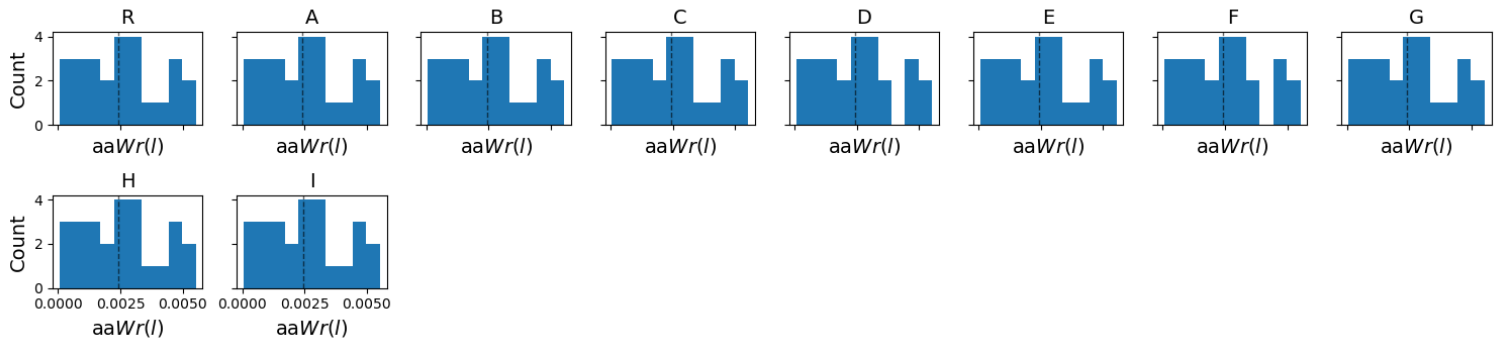

### 7q4m (12-42): Lecanemab (21-29) epitope

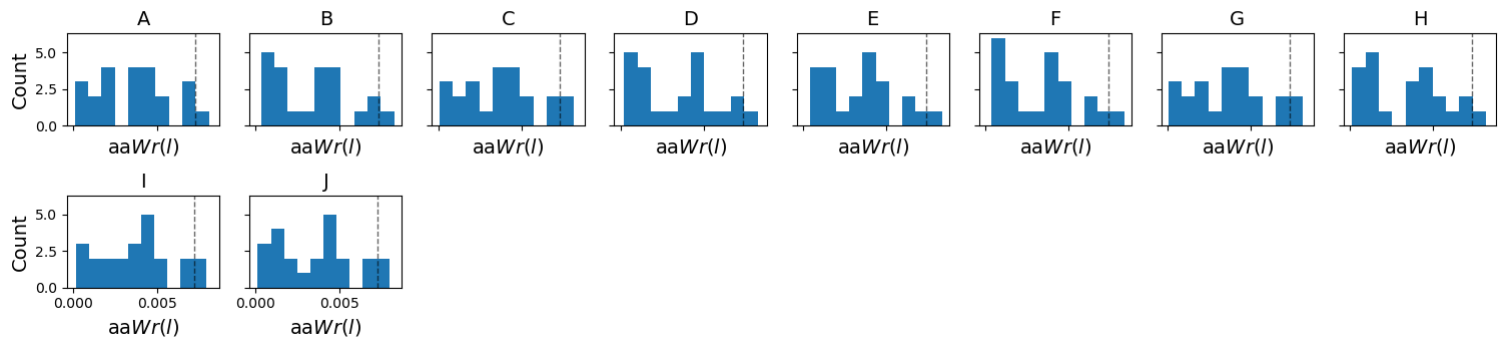

### 8azs (9-42): lecanemab (21-29) epitope

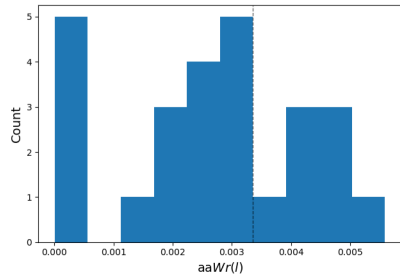

### 8azt (12-42): lecanemab (21-29) epitope

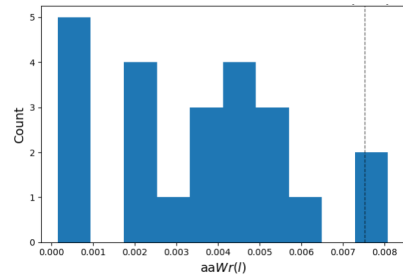

### 8bfa (1-38): Lecanemab (21-29) epitope

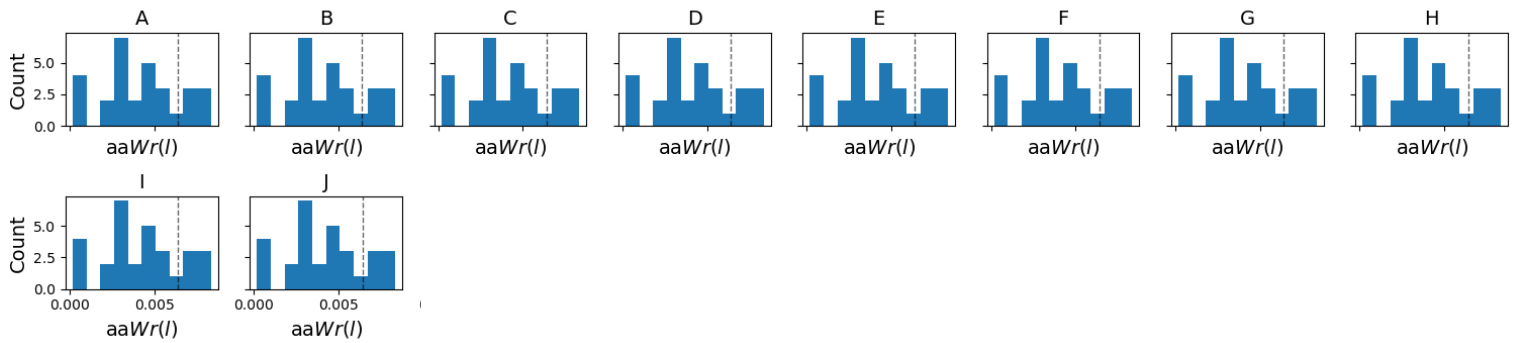

### 8bfb (1-38): Lecanemab (21-29) epitope

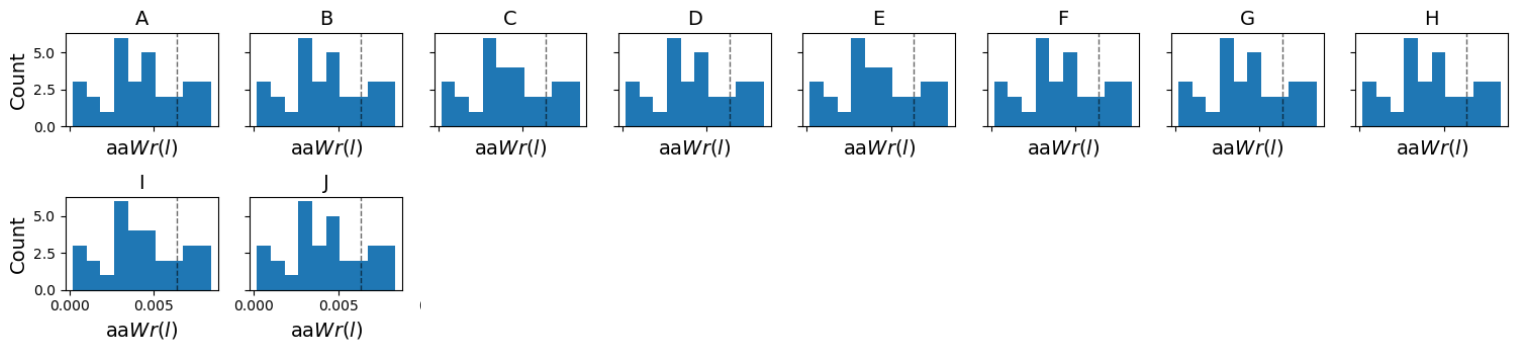

8bfz (12-42): Lecanemab (21-29) epitope

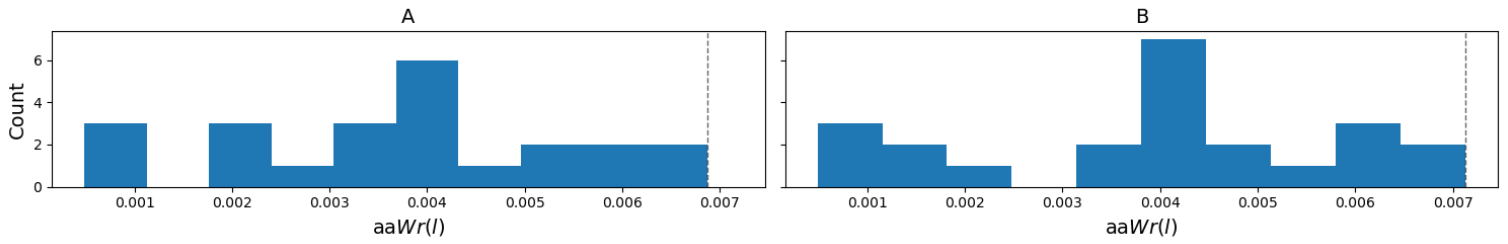

8bg0 (11-37): Lecanemab (21-29) epitope

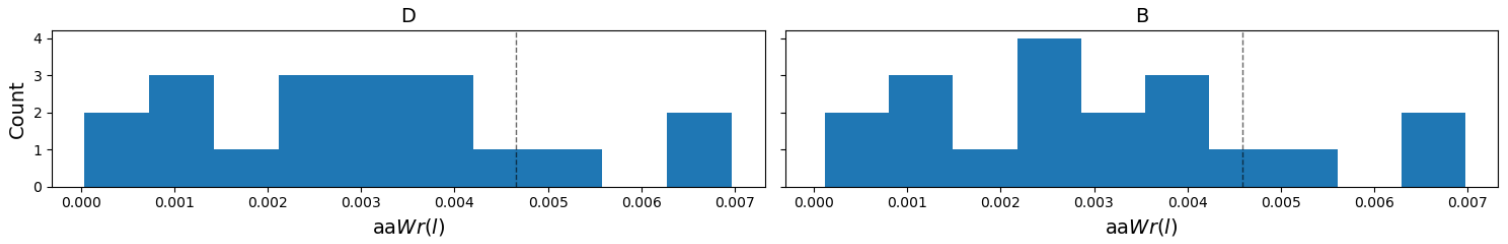

8bg0 (12-40): Lecanemab (21-29) epitope

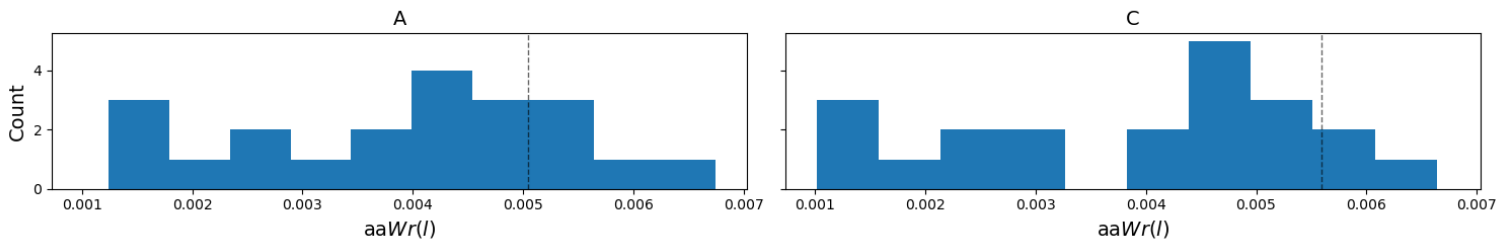

8bg9 (1-37): Lecanemab (21-29) epitope

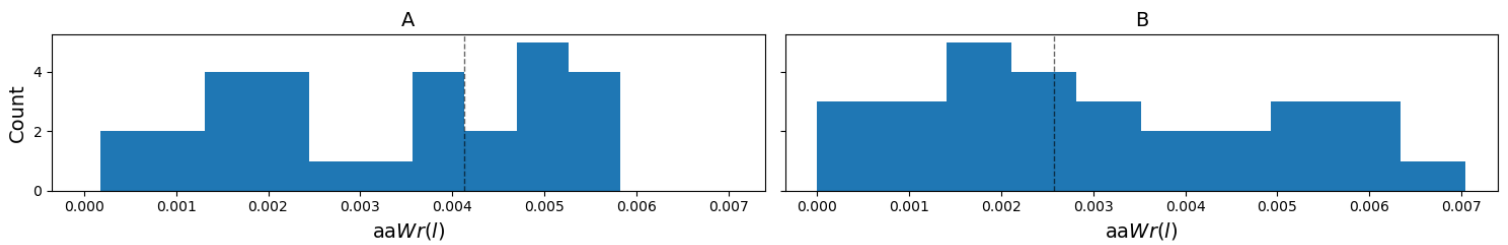

8ezd (12-42): Lecanemab (21-29) epitope

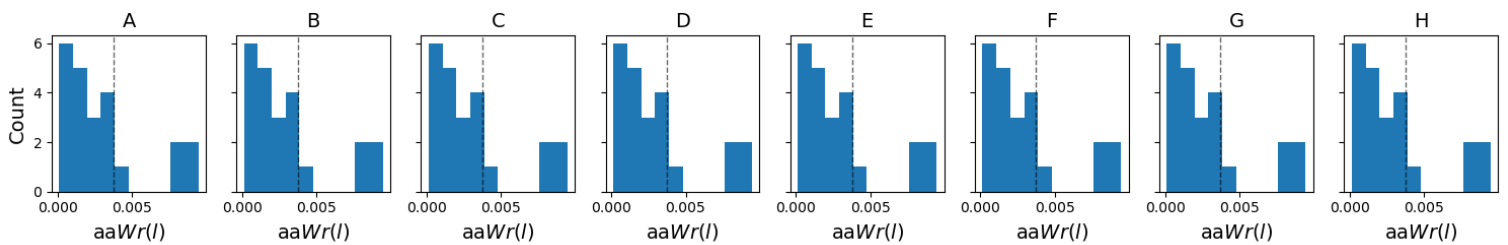

8eze (1-42): Lecanemab (21-29) epitope

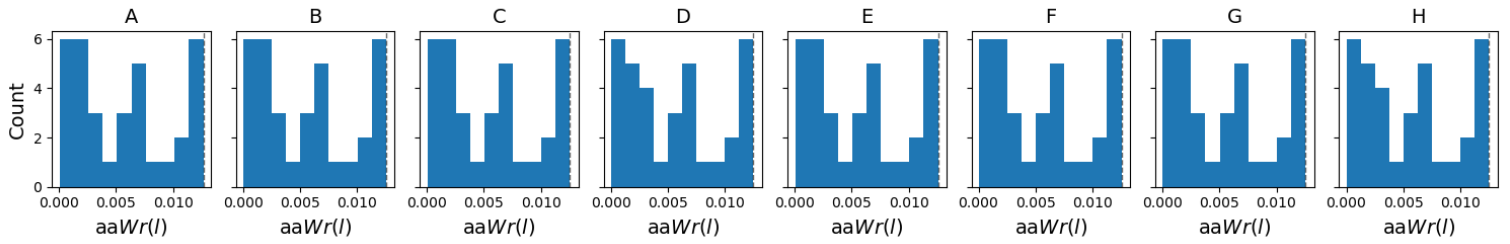

8kew (9-42): Lecanemab (21-29) epitope

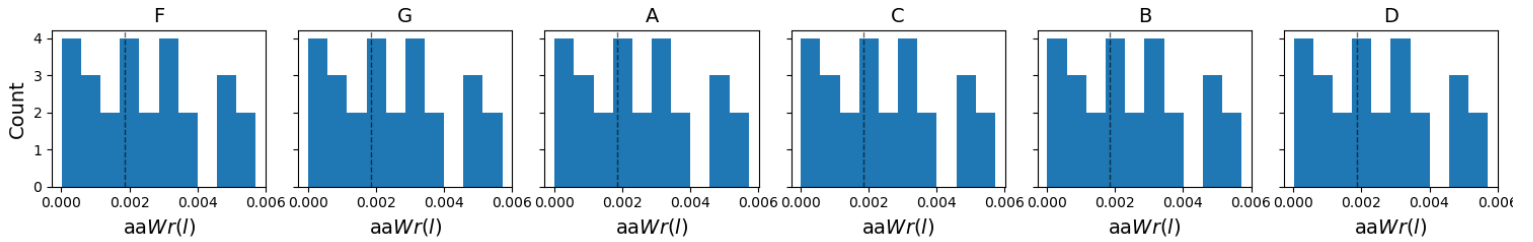

8kf1 (9-42): Lecanemab (21-29) epitope

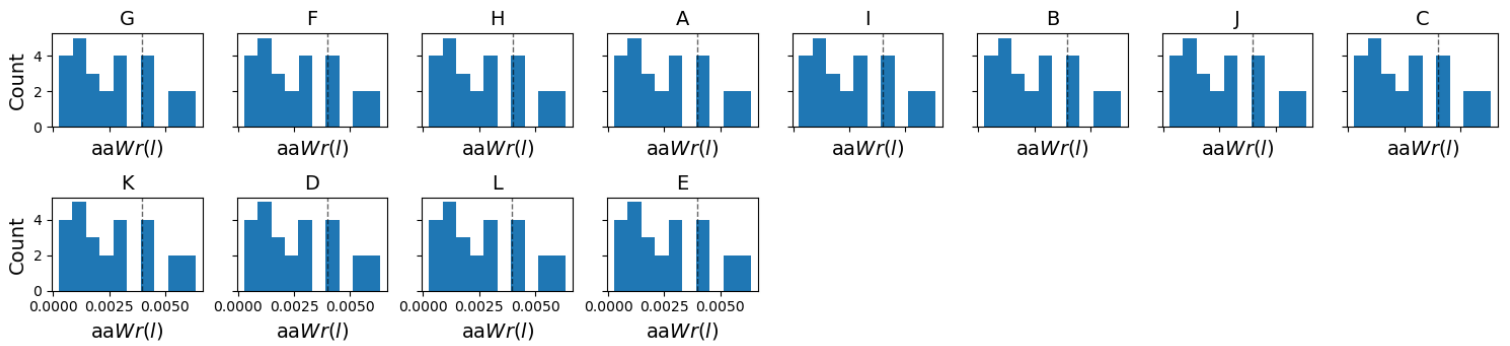

8kf3 (9-42): Lecanemab (21-29) epitope

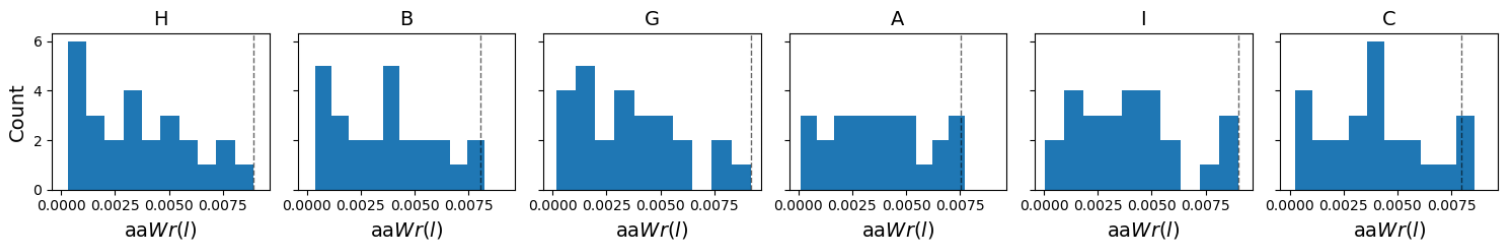

8kf3 (12-42): Lecanemab (21-29) epitope

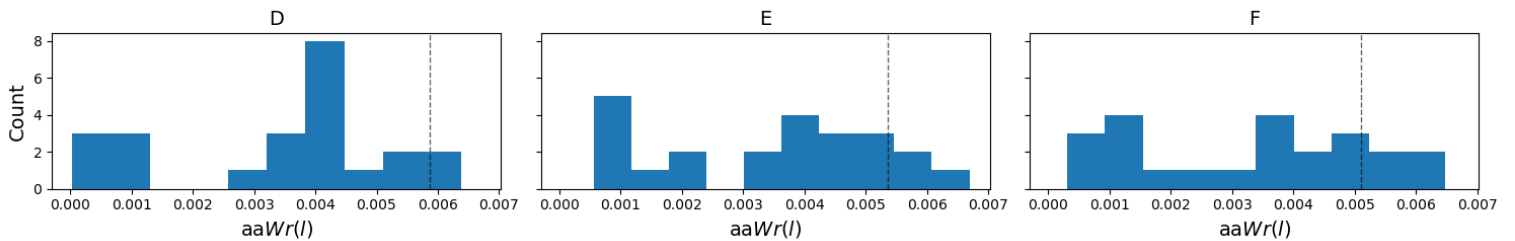

8kf4 (9-42): Lecanemab (21-29) epitope

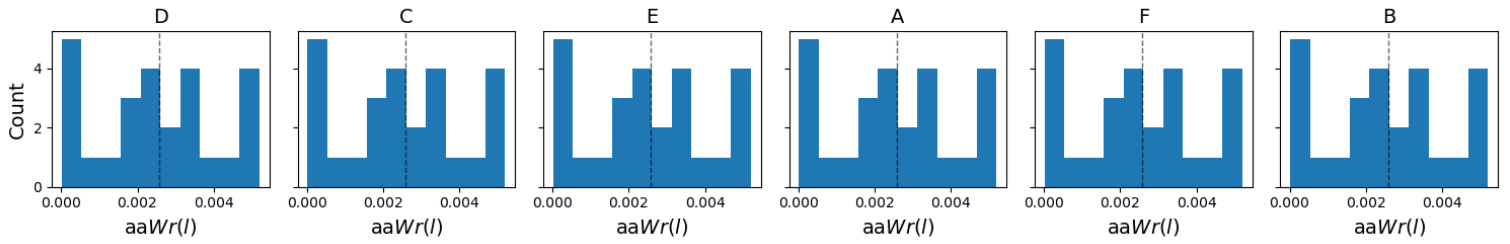

8kf5 (9-42): Lecanemab (21-29) epitope

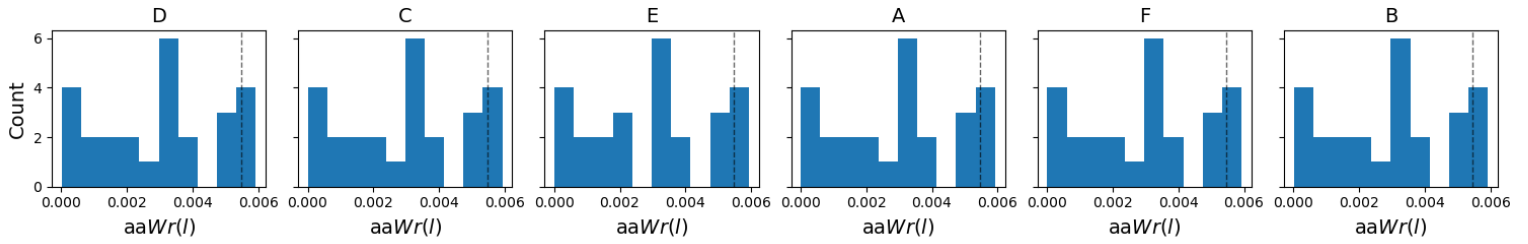

8kf6 (9-42): Lecanemab (21-29) epitope

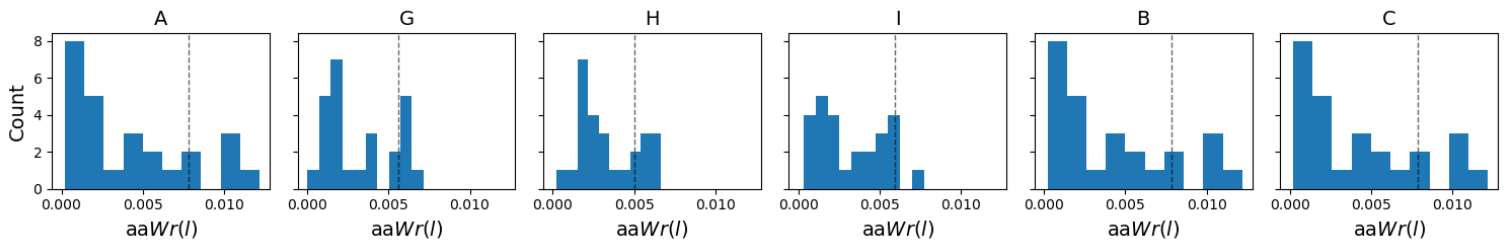

8kf6 (12-42): Lecanemab (21-29) epitope

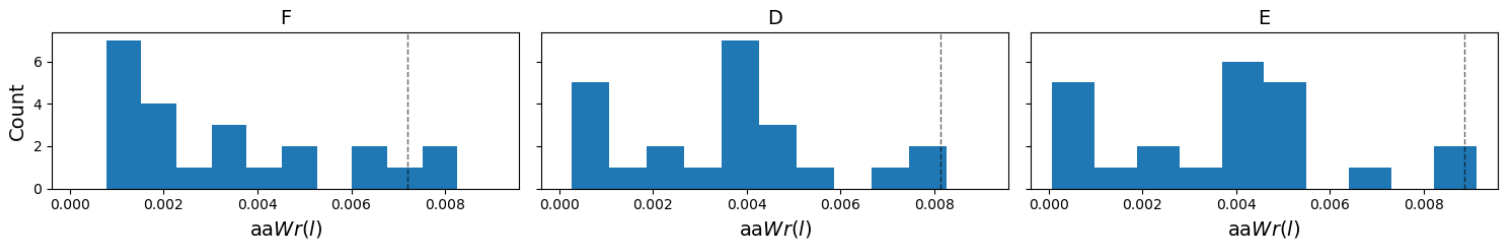

8ol2 (12-42): Lecanemab (21-29) epitope

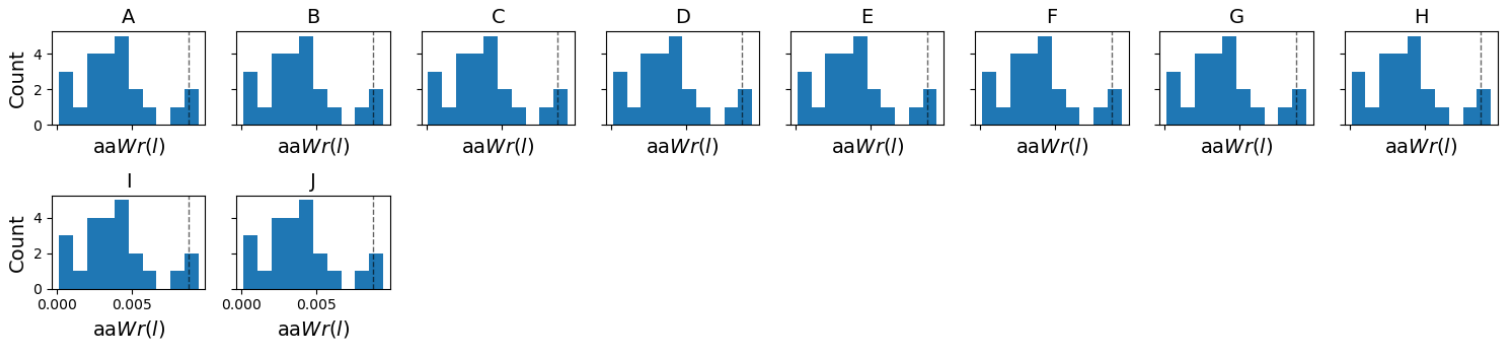

### 8o13 (10-42): Lecanemab (21-29) epitope

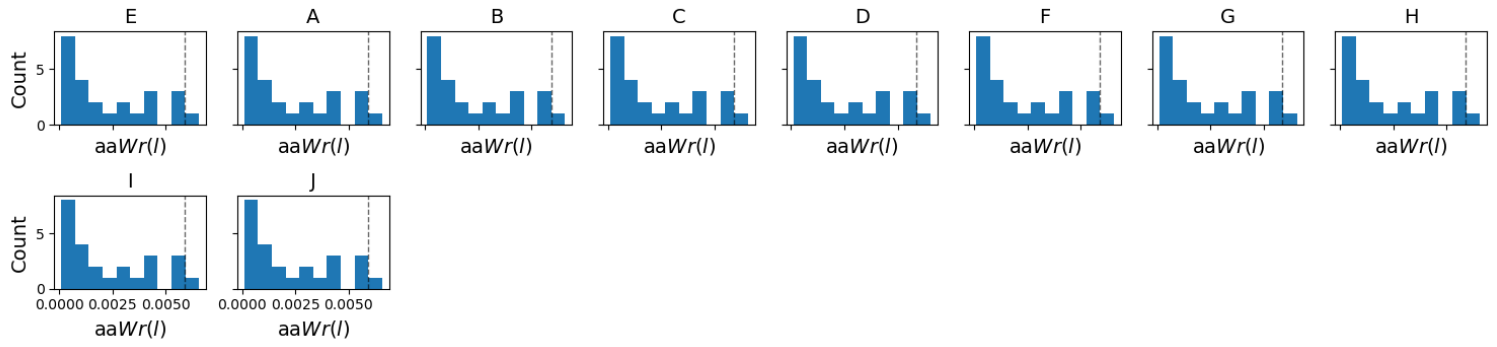

### 8o15 (12-42): Lecanemab (21-29) epitope

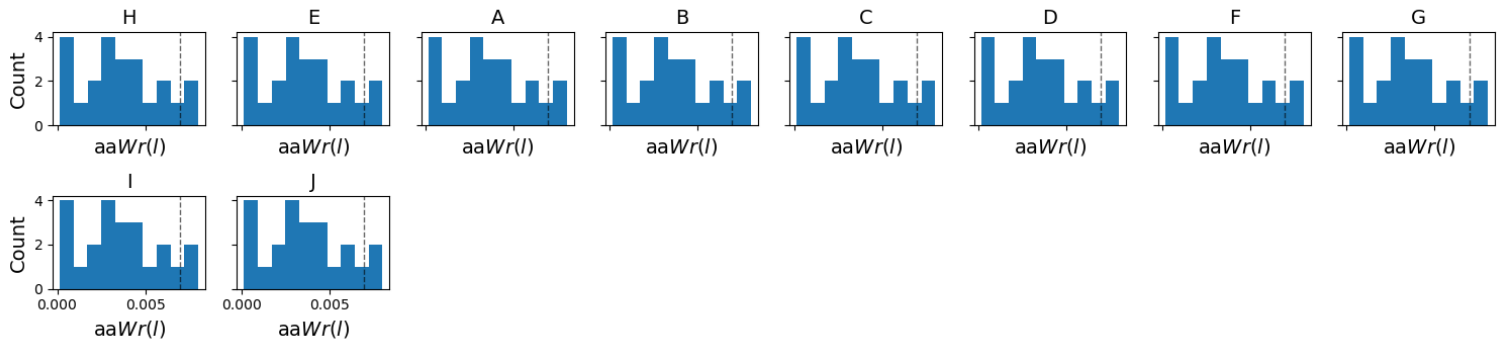

### 8o16 (12-42): Lecanemab (21-29) epitope

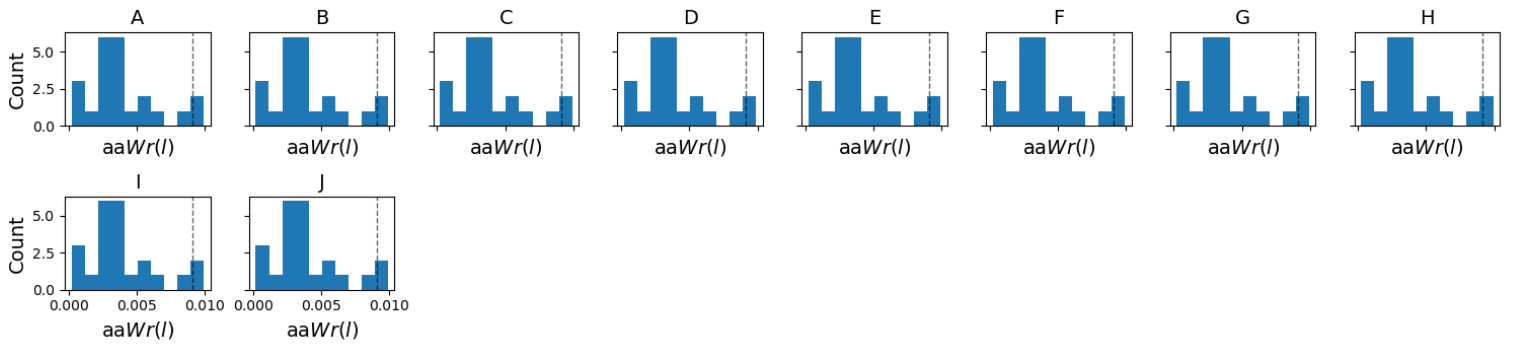

### 8o17 (9-40): Lecanemab (21-29) epitope

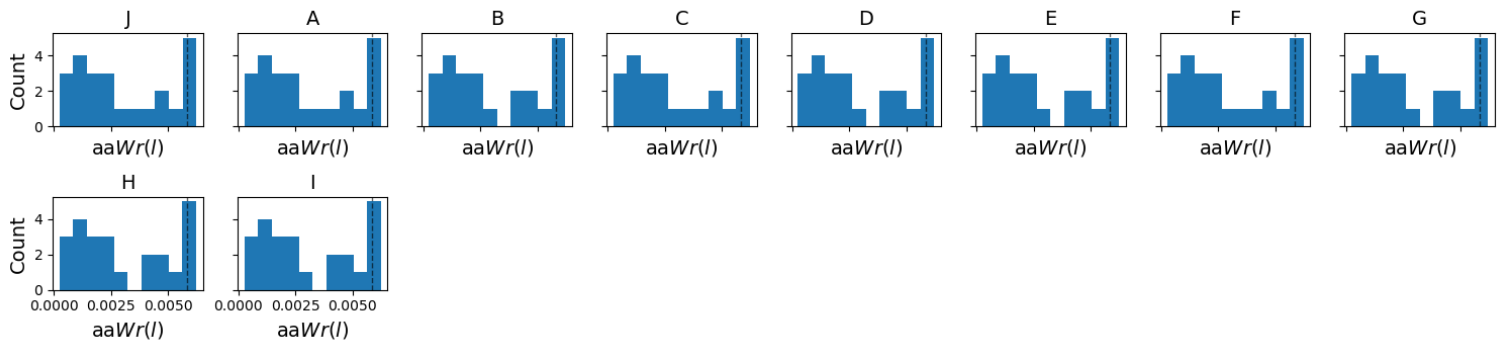

### 8olg (1-39): Lecanemab (21-29) epitope

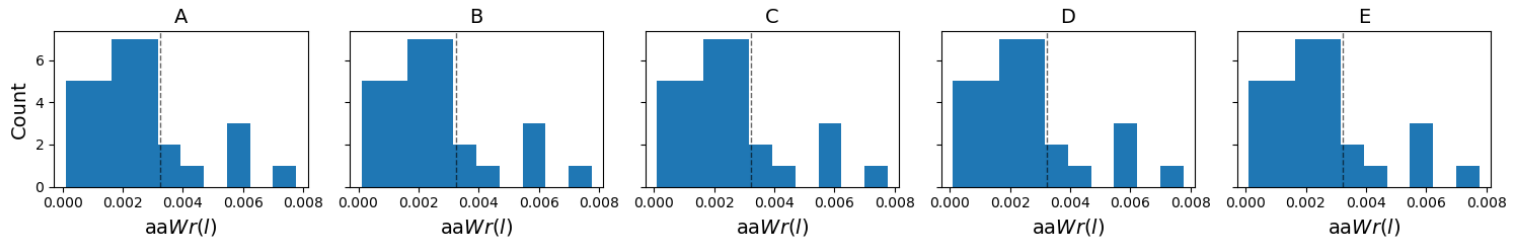

### 8oln (1-36): Lecanemab (21-29) epitope

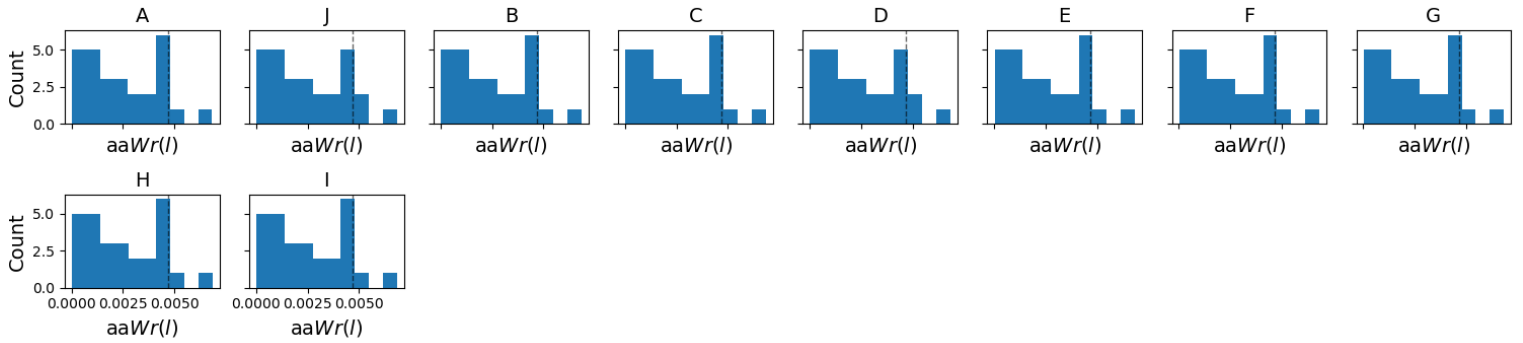

### 8olo (10-40): Lecanemab (21-29) epitope

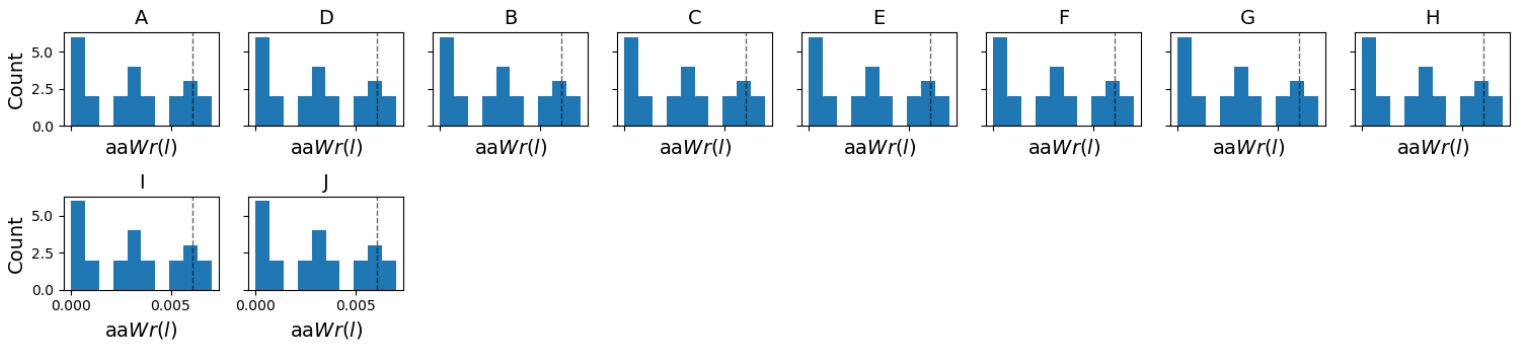

### 8olq (2-33): Lecanemab (21-29) epitope

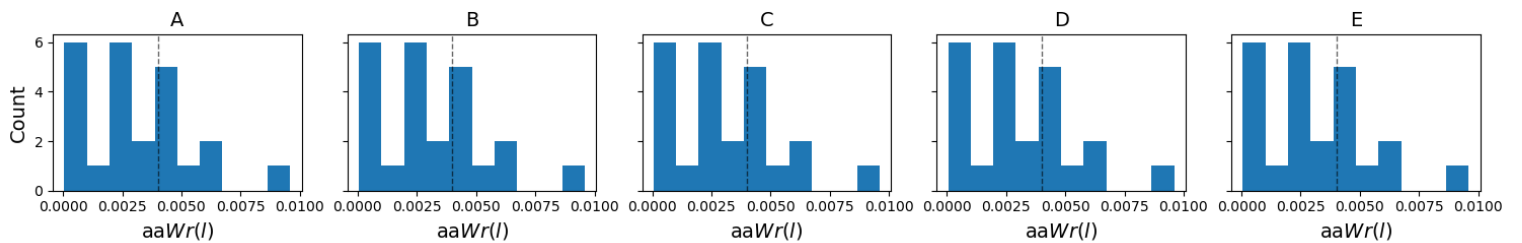

### 8ot1 (13-40): Lecanemab (21-29) epitope

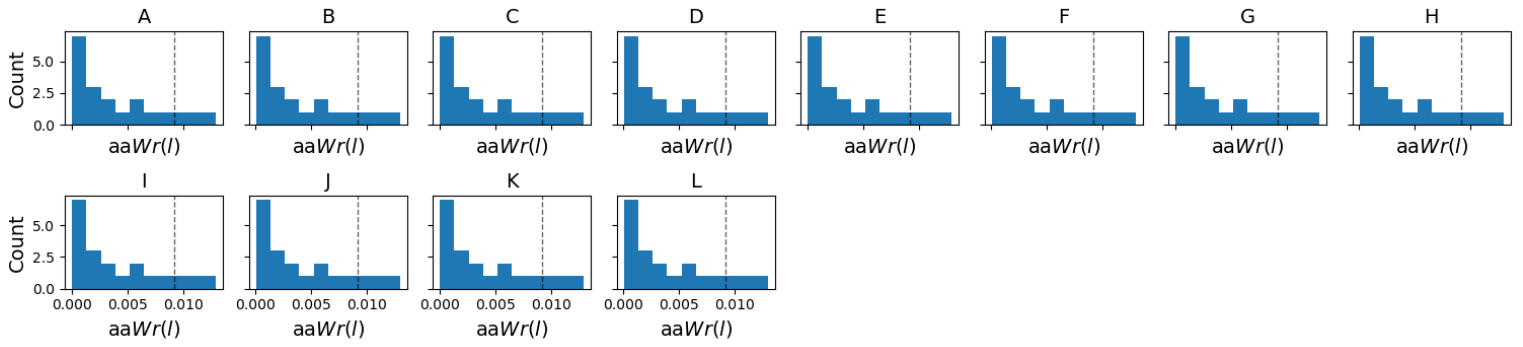

### 8ot3 (13-40): Lecanemab (21-29) epitope

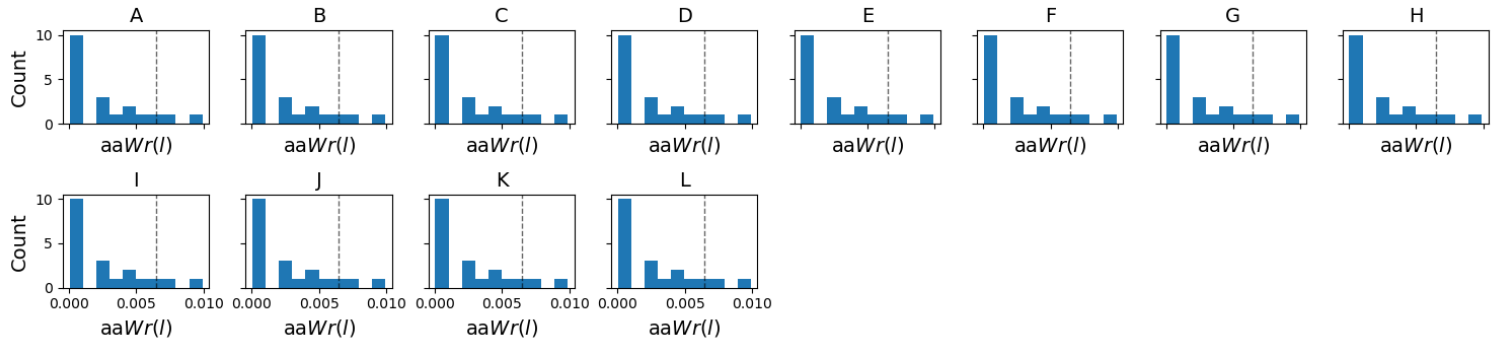

### 8ot4 (1-37): Lecanemab (21-29) epitope

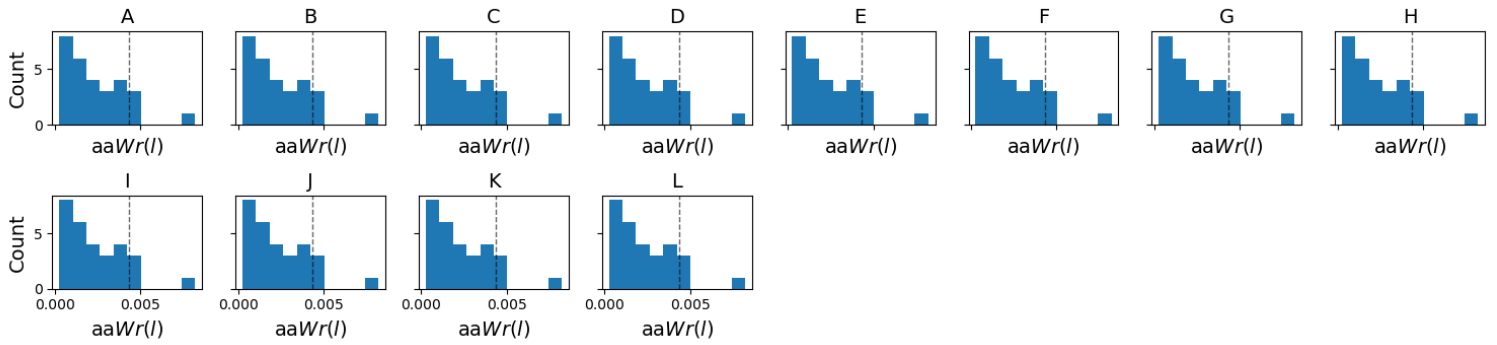

### 8otf (12-42): Lecanemab (21-29) epitope

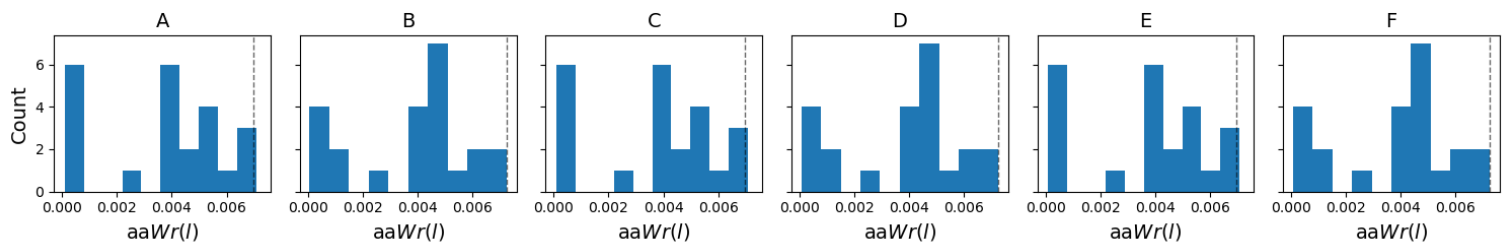

### 8ovk (1-40): Lecanemab (21-29) epitope

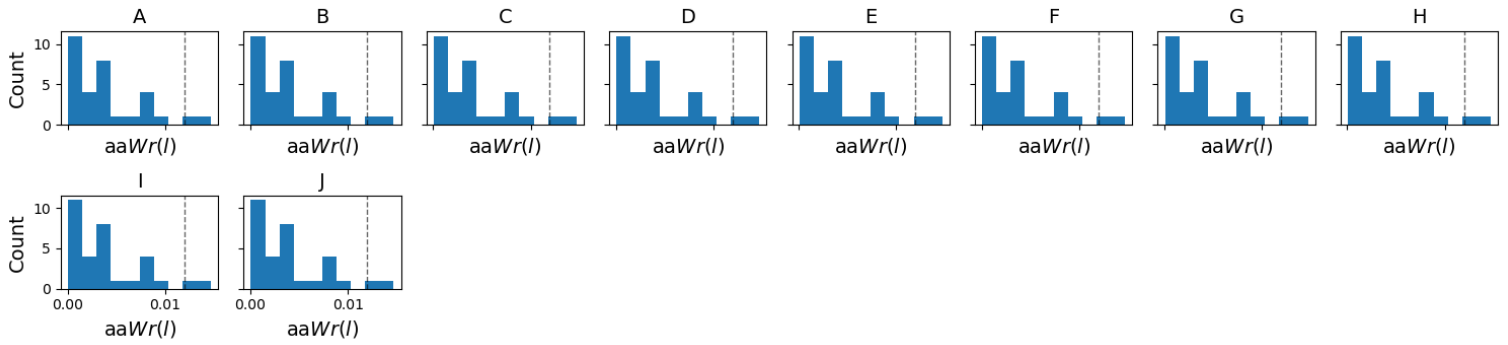

### 8ovm (5-40): Lecanemab (21-29) epitope

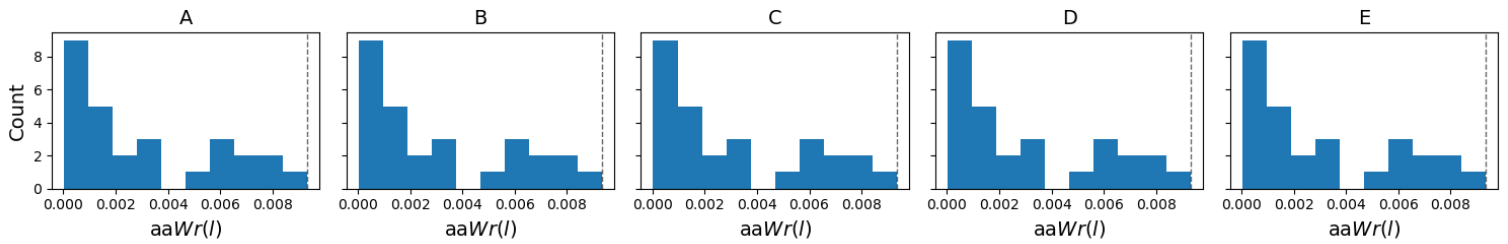

### 8owd (1-40): Lecanemab (21-29) epitope

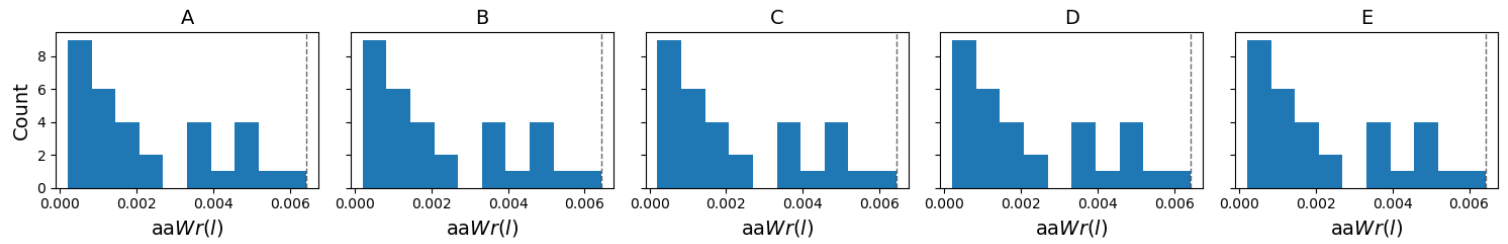

### 8owe (1-40): Lecanemab (21-29) epitope

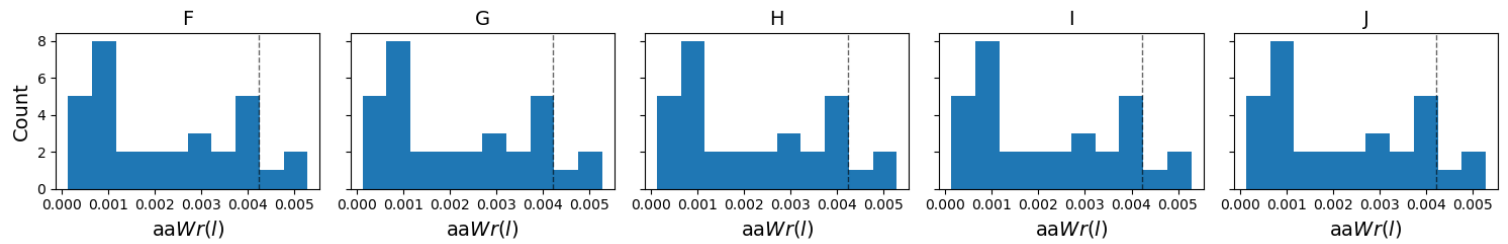

### 8owe (4-40): Lecanemab (21-29) epitope

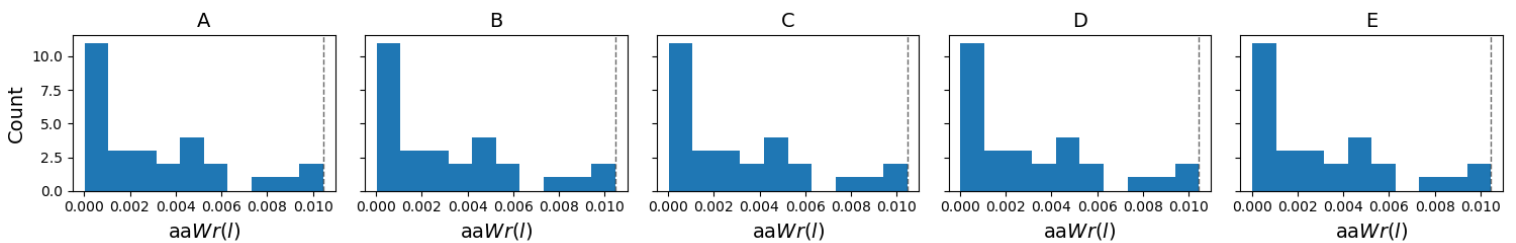

### 8owj (5-40): Lecanemab (21-29) epitope

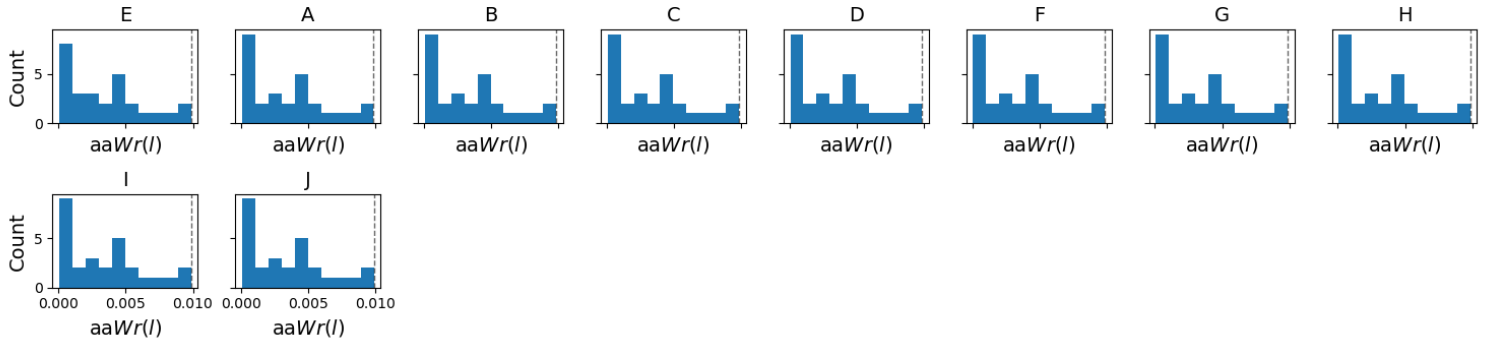

### 8owk (1-40): Lecanemab (21-29) epitope

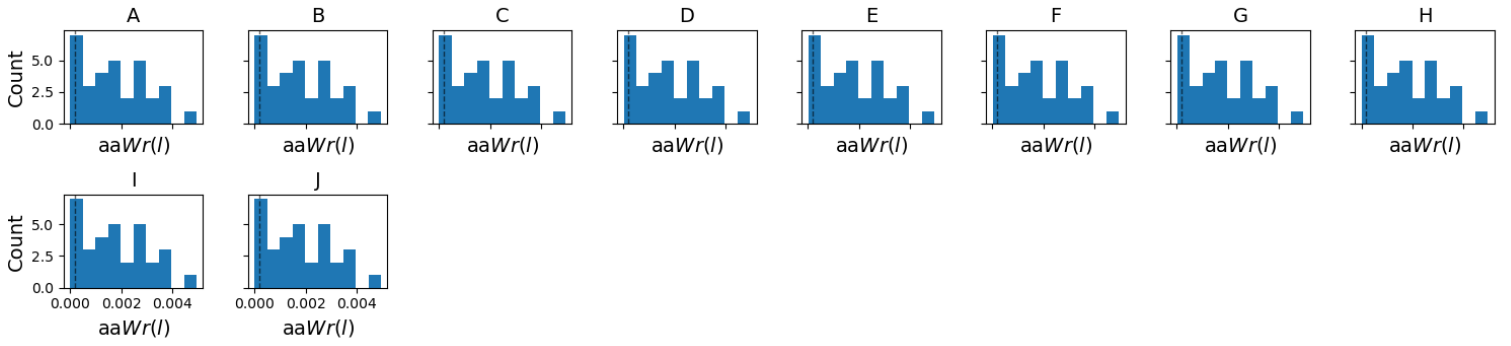

### 8qn6 (1-38): Lecanemab (21-29) epitope

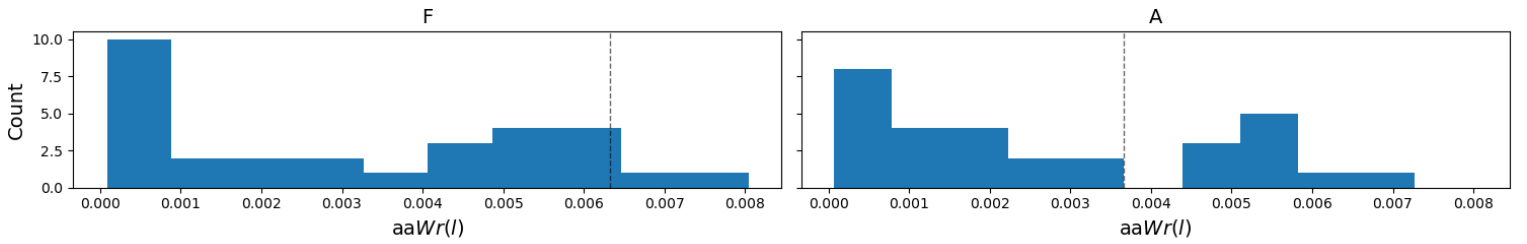

### 8qn7 (1-38): lecanemab (21-29) epitope

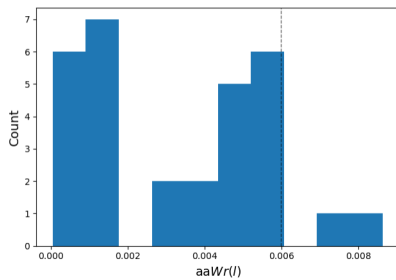

### 8sej (9-42): Lecanemab (21-29) epitope

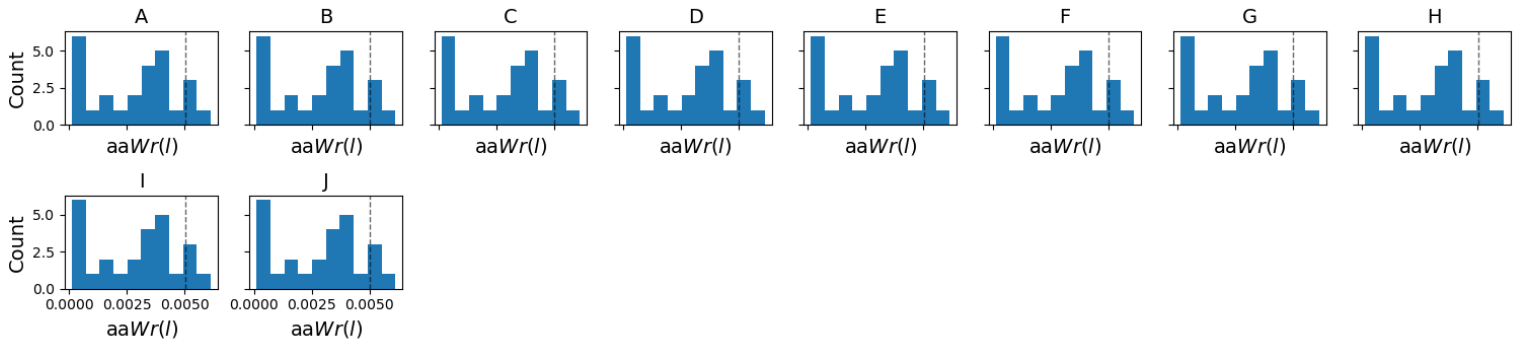

### 8sek (9-40): Lecanemab (21-29) epitope

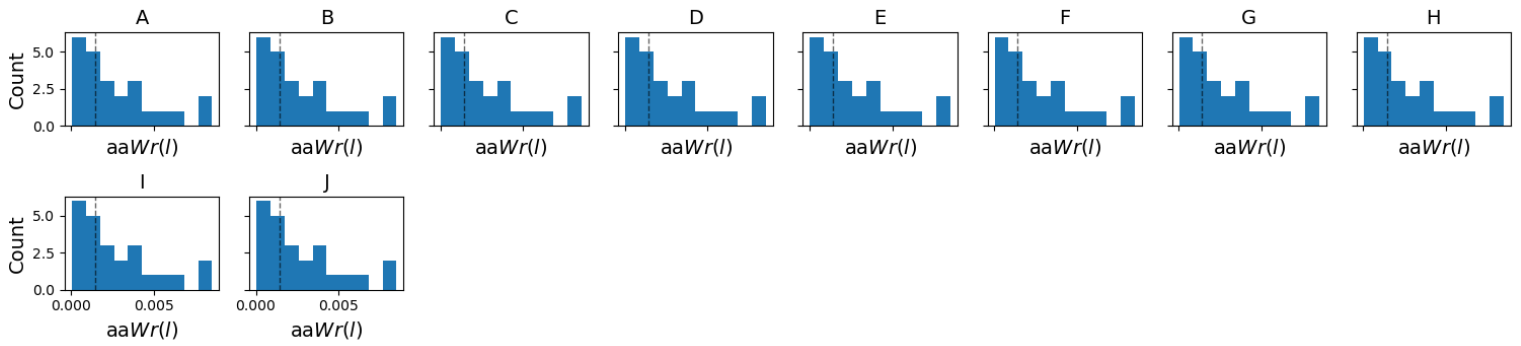

### 8sel (1-40): Lecanemab (21-29) epitope

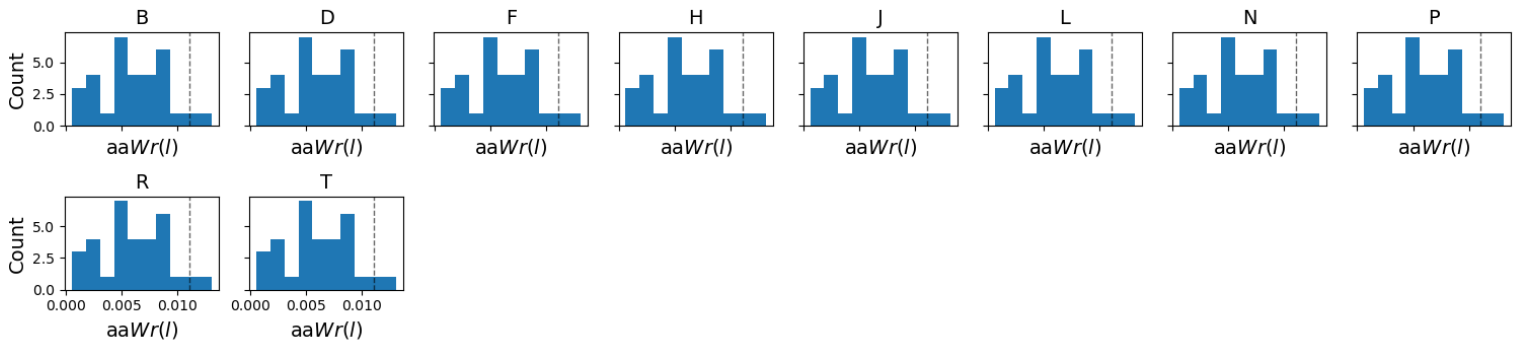

### 9jaz (9-42): Lecanemab (21-29) epitope

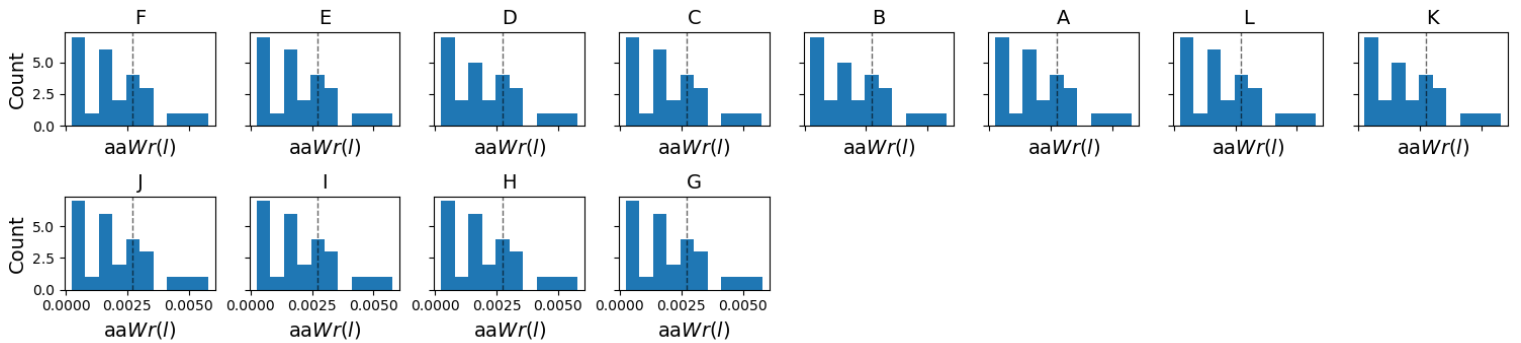

### 9jb0 (9-42): Lecanemab (21-29) epitope

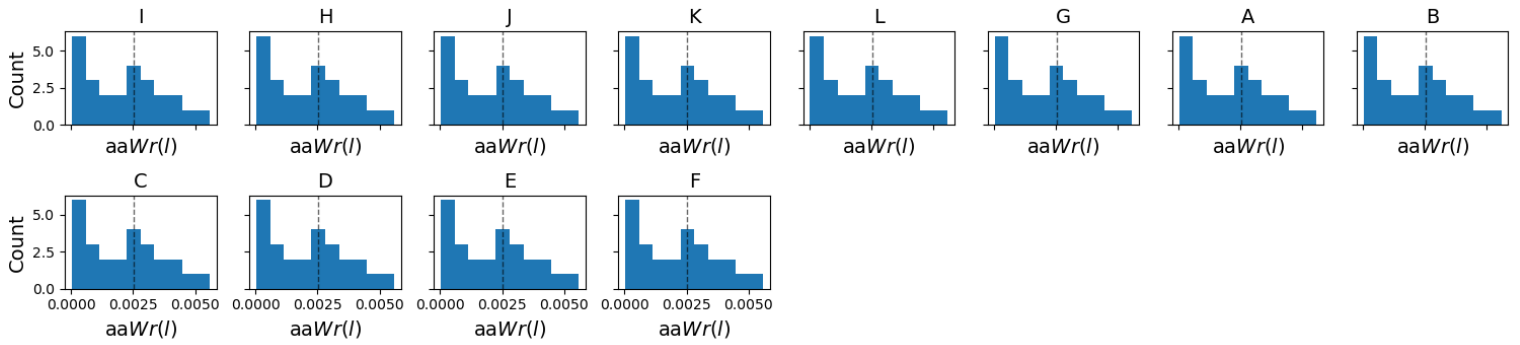

### 9jb1 (9-42): Lecanemab (21-29) epitope

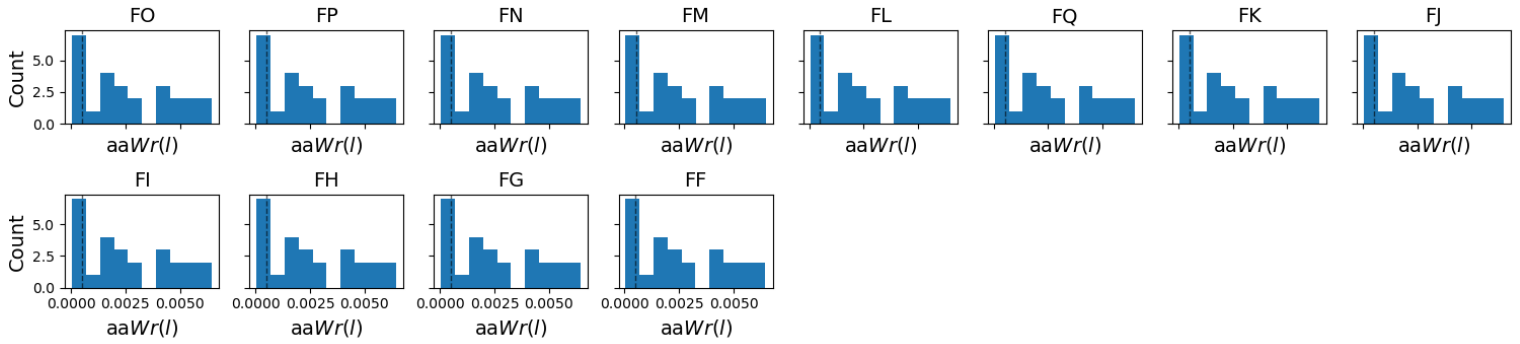

### 9jb2 (1-42): Lecanemab (21-29) epitope

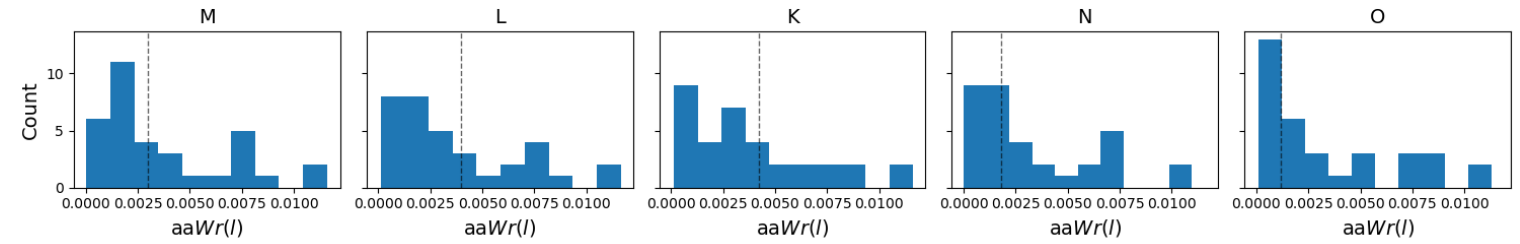

### 9jb2 (9-42): Lecanemab (21-29) epitope

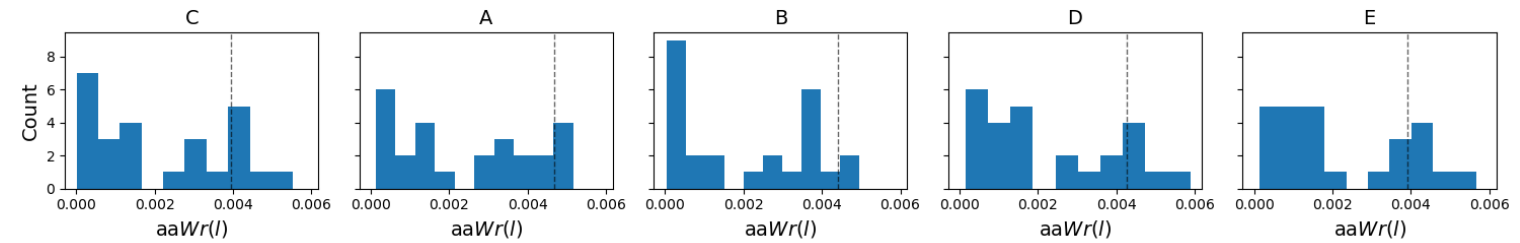

9jb2 (15-42): Lecanemab (21-29) epitope

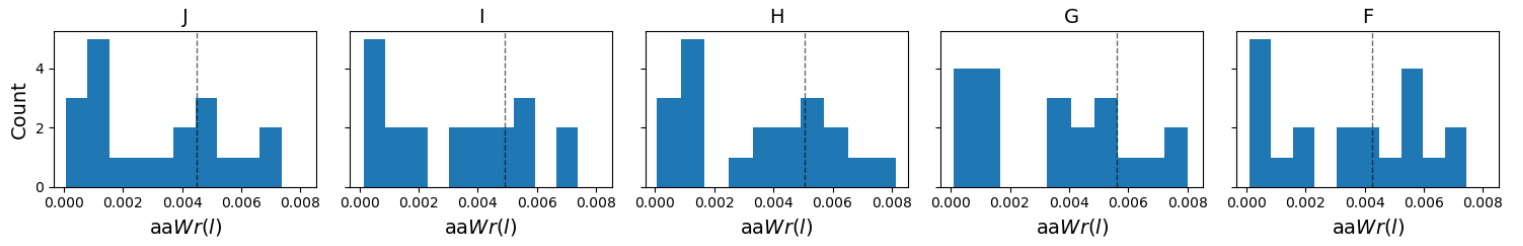

**b****2m4j (1-40): Lecanemab (1-16) epitope**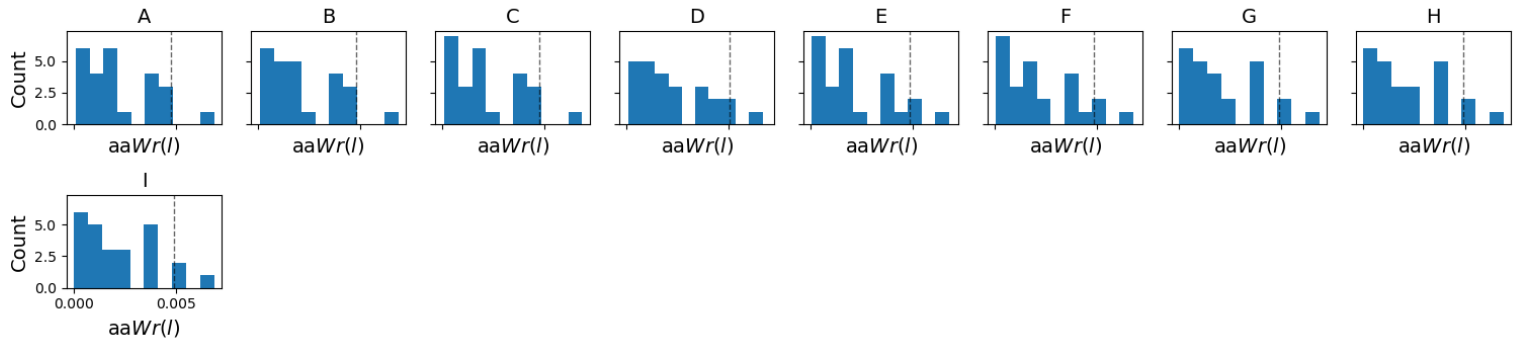**2nao (1-42): Lecanemab (1-16) epitope**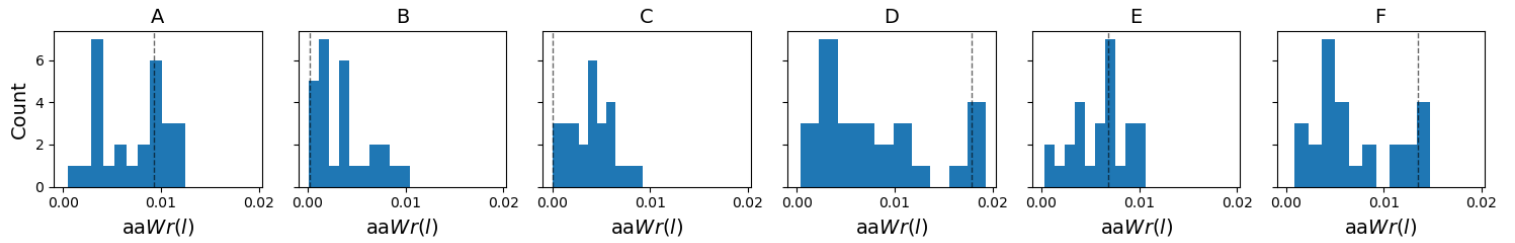**6shs (1-40): Lecanemab (1-16) epitope**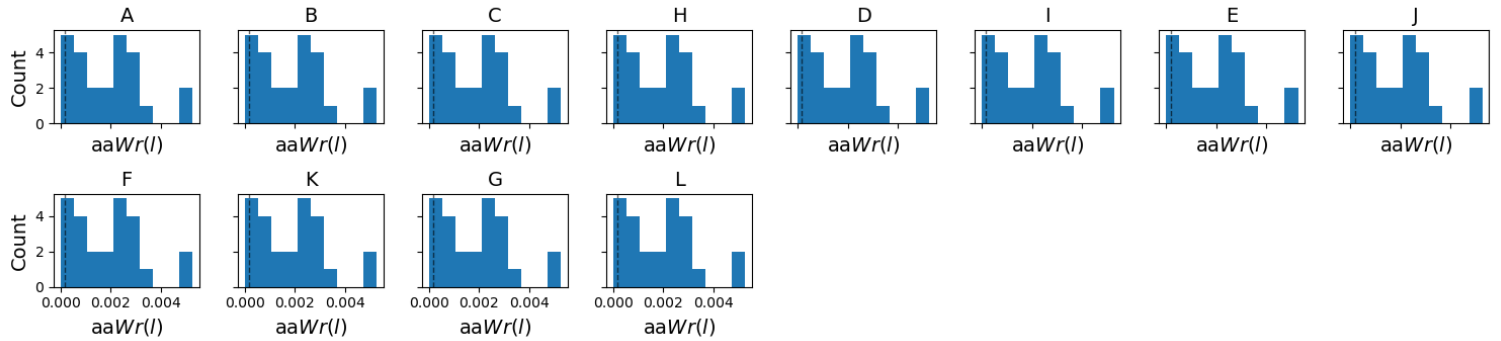**8bfa (1-38): Lecanemab (1-16) epitope**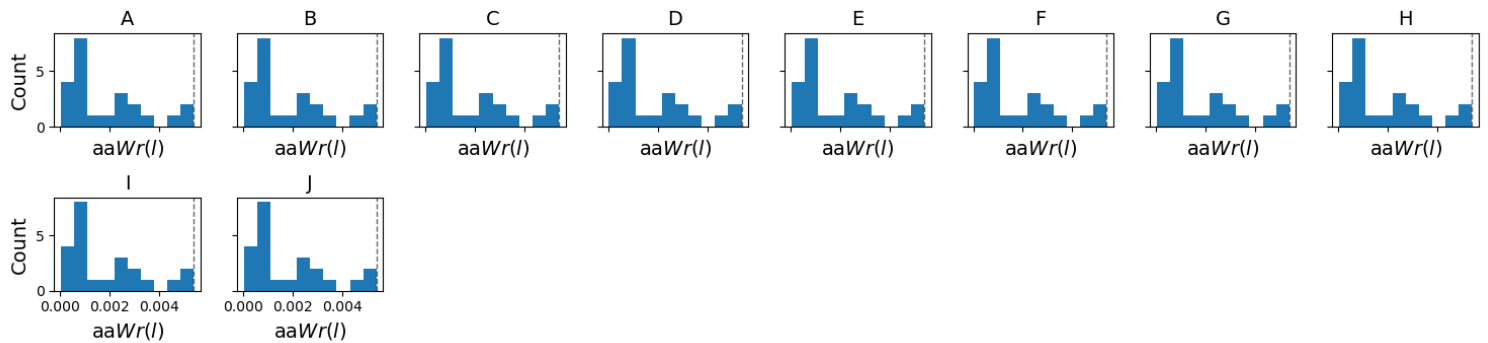

### 8bf8 (1-38): Lecanemab (1-16) epitope

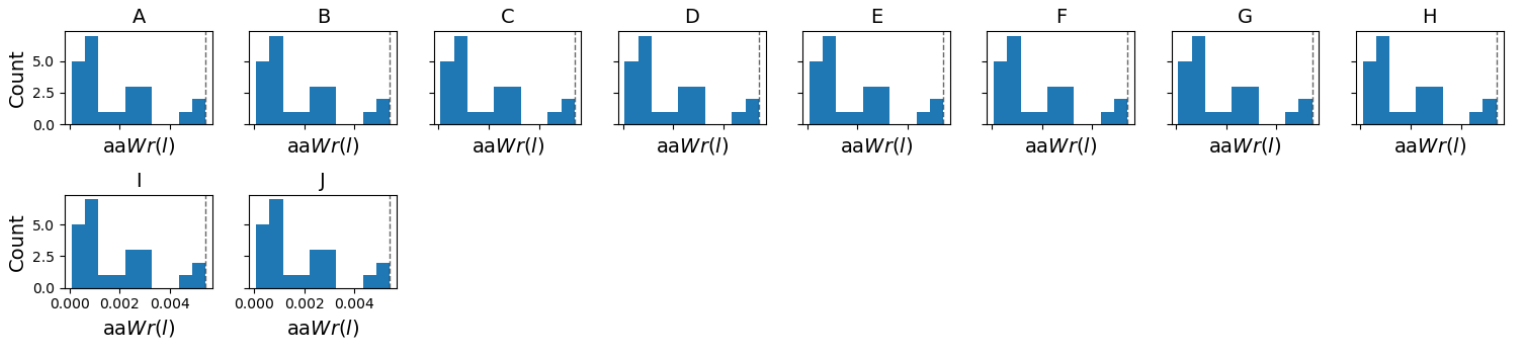

### 8bg9 (1-37): Lecanemab (1-16) epitope

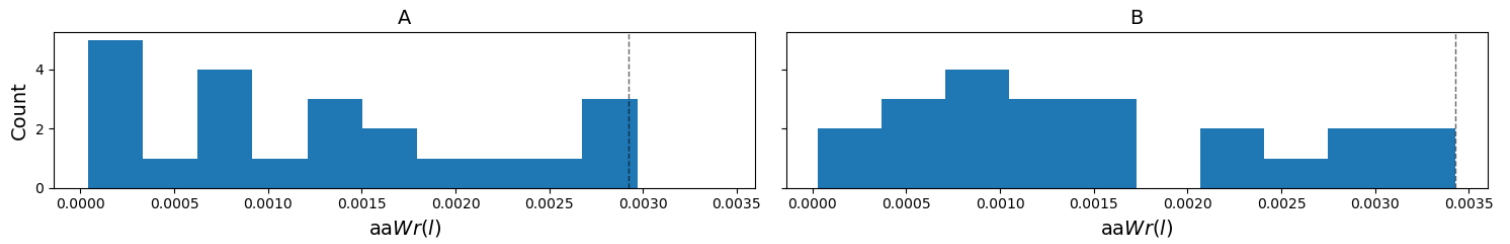

### 8eze (1-42): Lecanemab (1-16) epitope

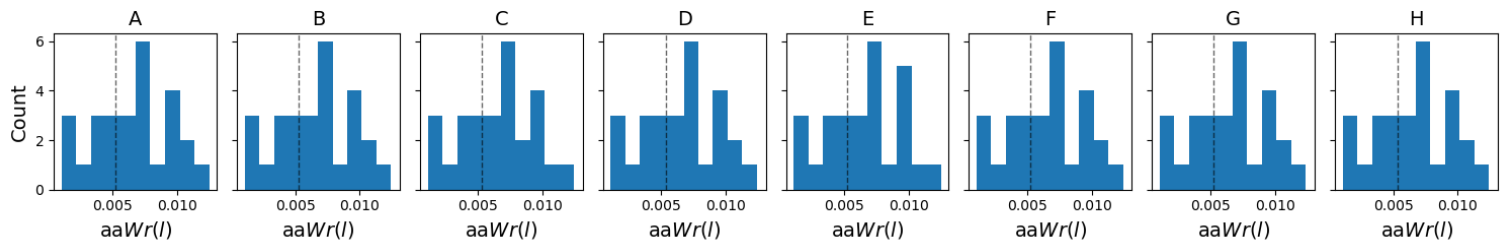

### 8olg (1-39): Lecanemab (1-16) epitope

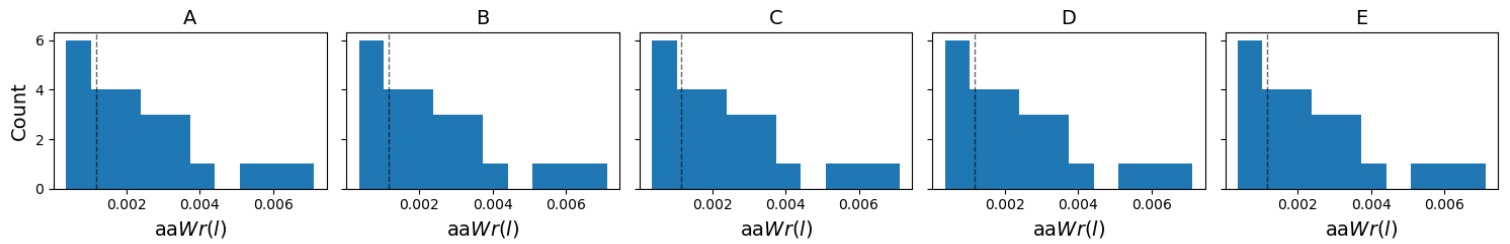

### 8oIn (1-36): Lecanemab (1-16) epitope

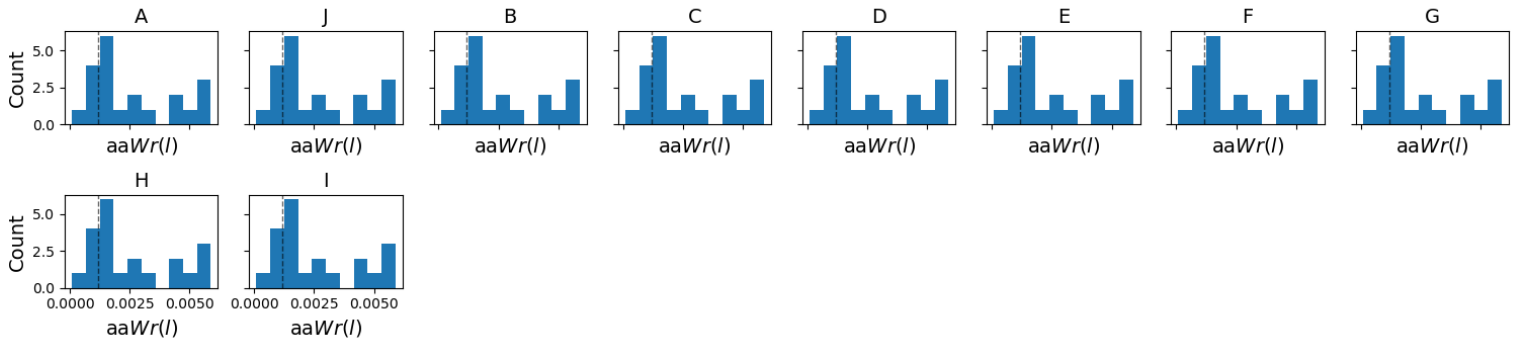

### 8ot4 (1-37): Lecanemab (1-16) epitope

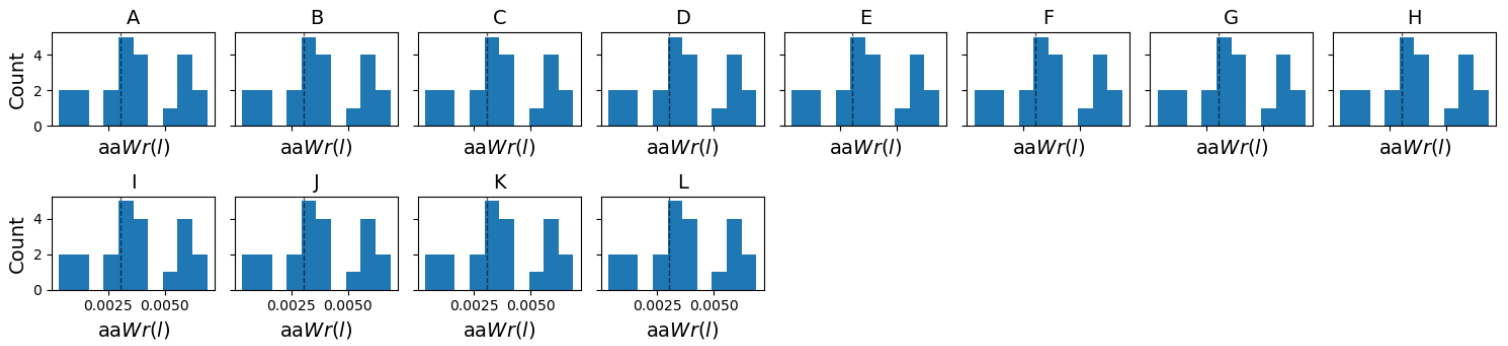

### 8ovk (1-40): Lecanemab (1-16) epitope

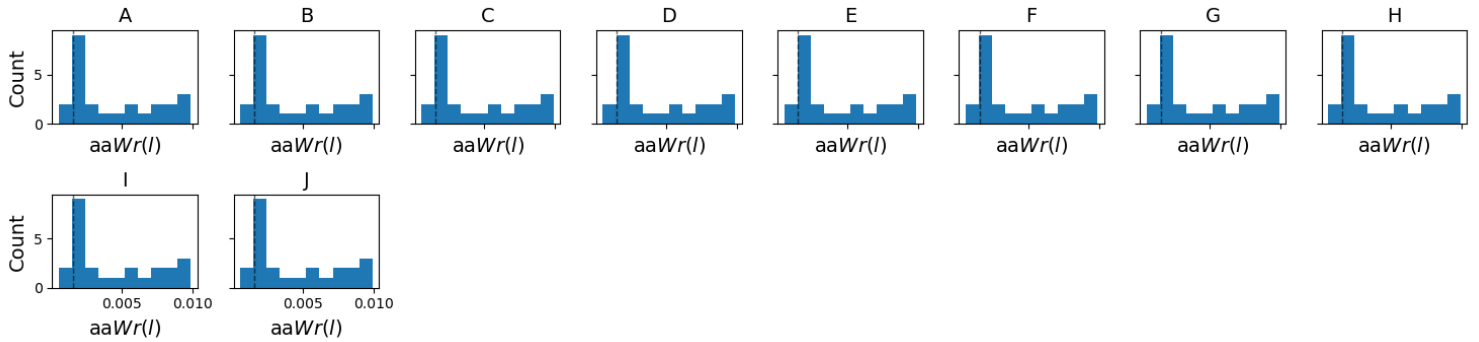

### 8owd (1-40): Lecanemab (1-16) epitope

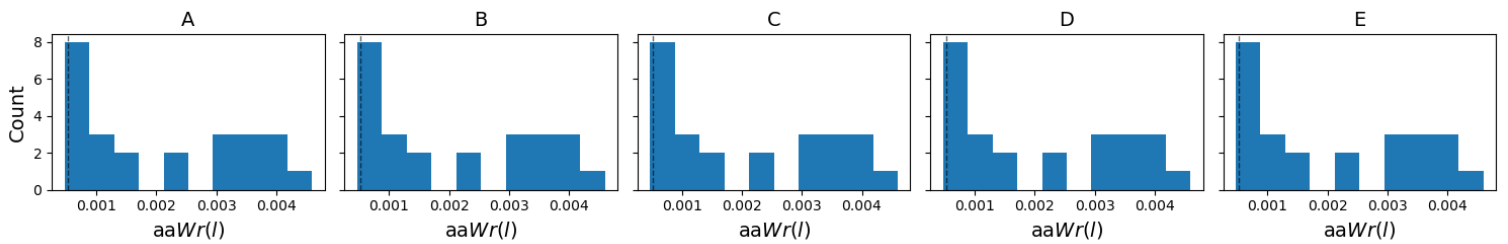

8owe (1-40): Lecanemab (1-16) epitope

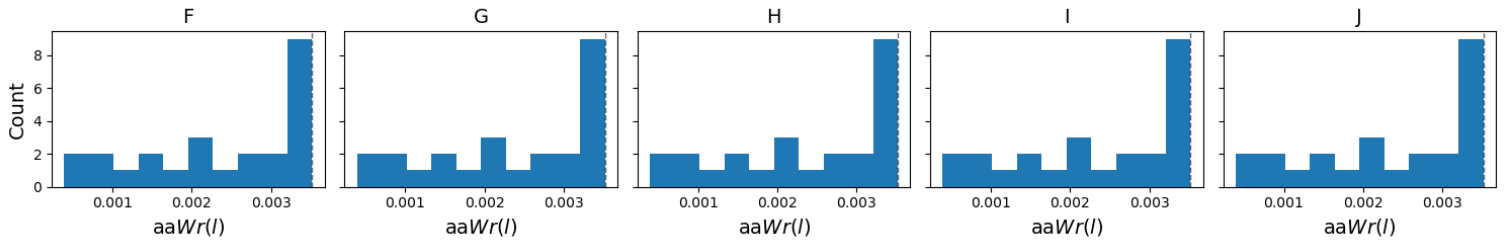

8owk (1-40): Lecanemab (1-16) epitope

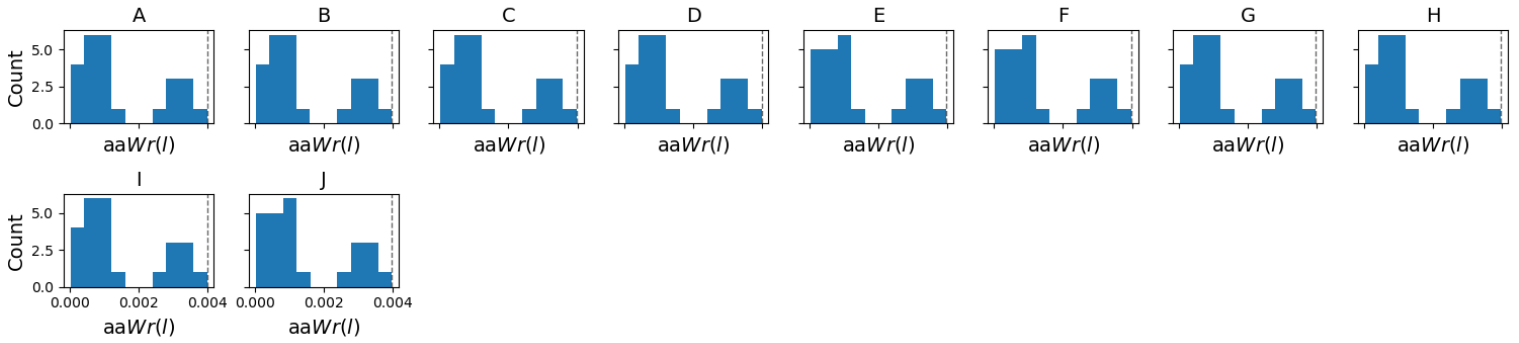

8qn6 (1-38): Lecanemab (1-16) epitope

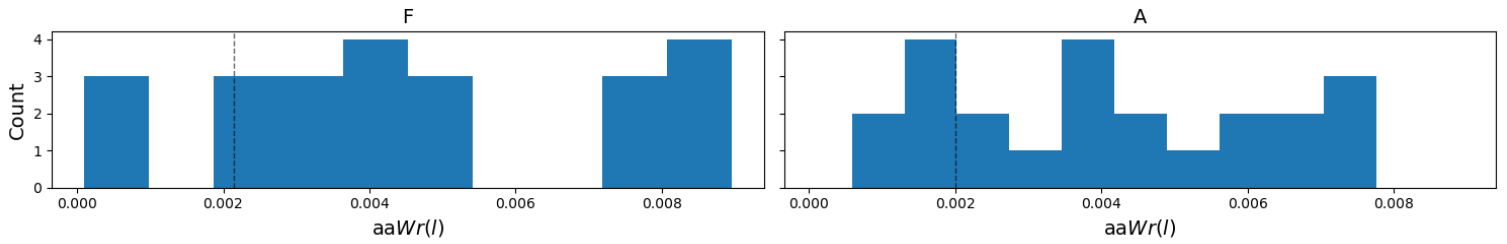

8qn7 (1-38): Lecanemab (1-16) epitope

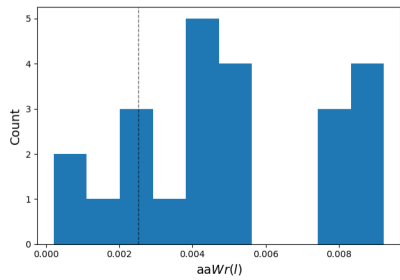

### 8sel (1-40): Lecanemab (1-16) epitope

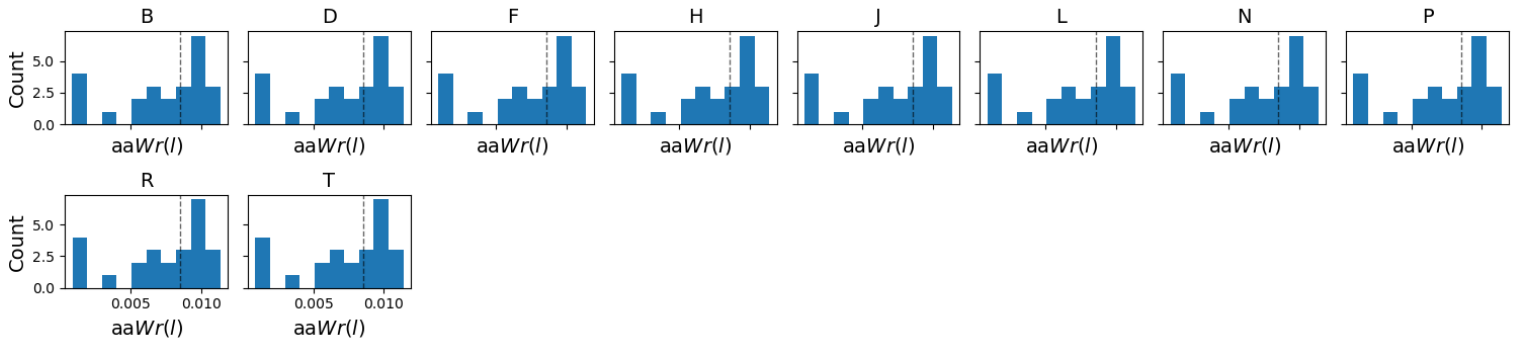

### 9jb2 (1-42): Lecanemab (1-16) epitope

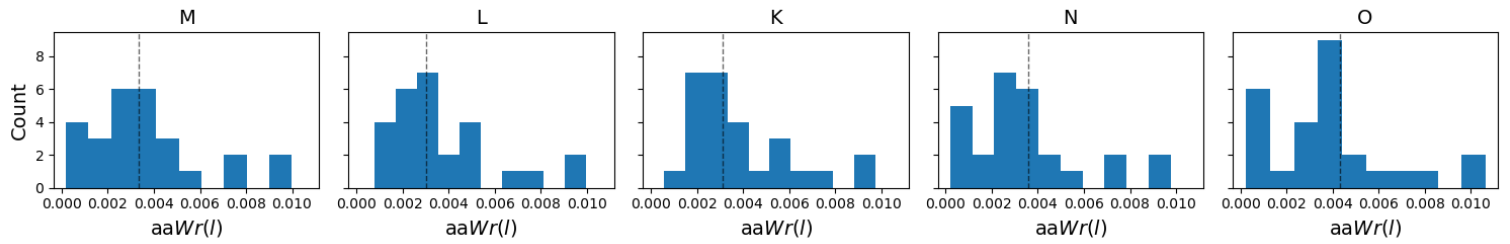

**C****2m4j (1-40): Aducanumab (3-7) epitope**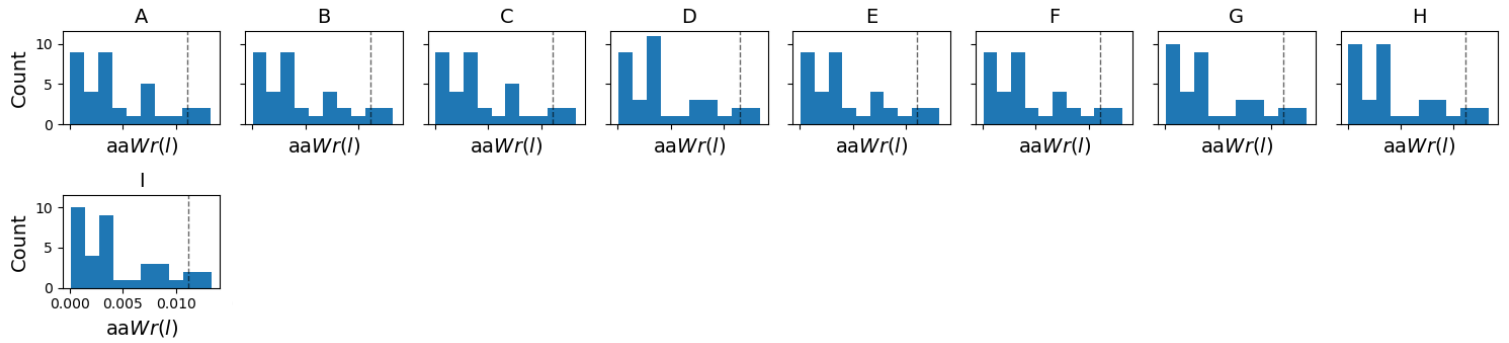**2nao (1-42): Aducanumab (3-7) epitope**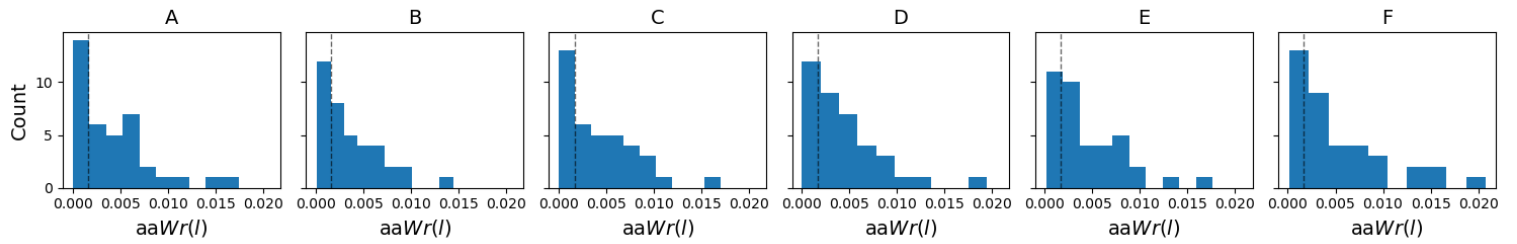**6shs (1-40): Aducanumab (3-7) epitope**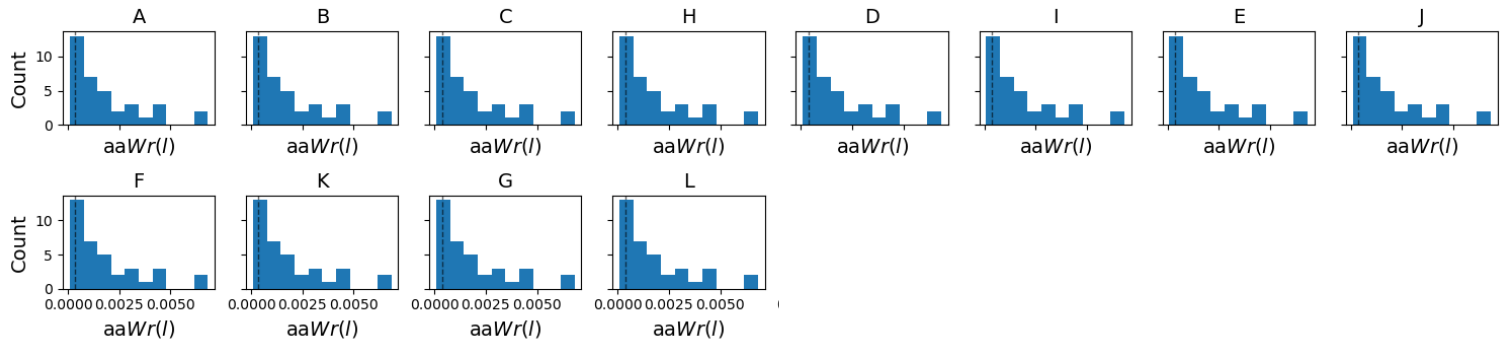**8bfa (1-38): Aducanumab (3-7) epitope**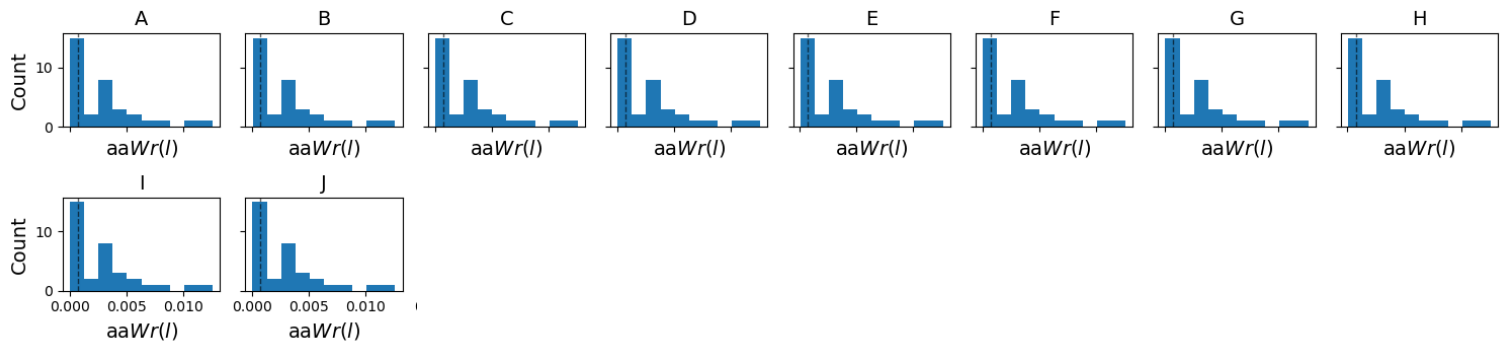

### 8bfb (1-38): Aducanumab (3-7) epitope

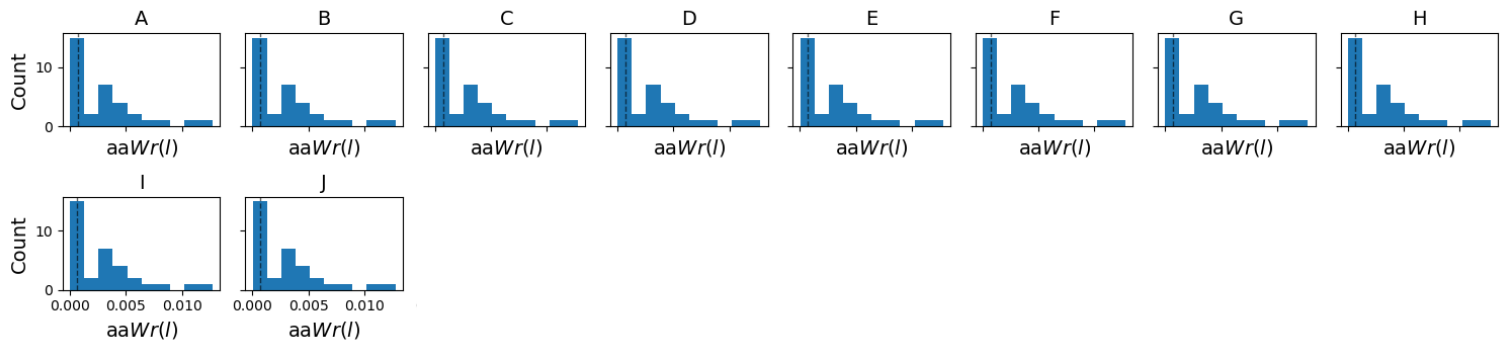

### 8bg9 (1-37): Aducanumab (3-7) epitope

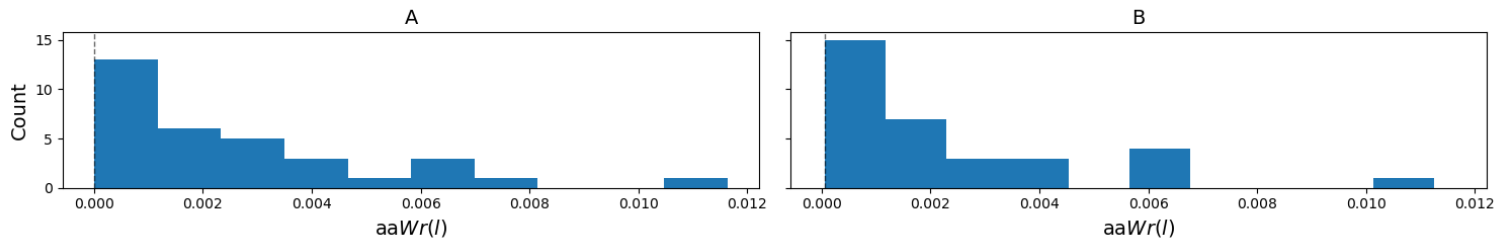

### 8eze (1-42): Aducanumab (3-7) epitope

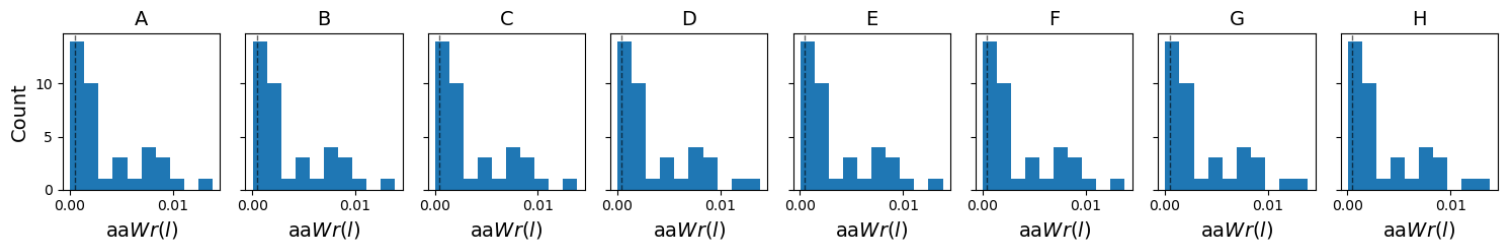

### 8olg (1-39): Aducanumab (3-7) epitope

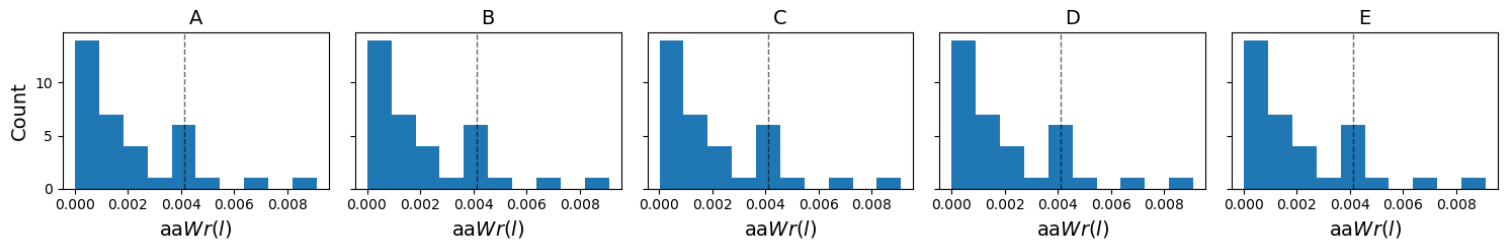

### 80ln (1-36): Aducanumab (3-7) epitope

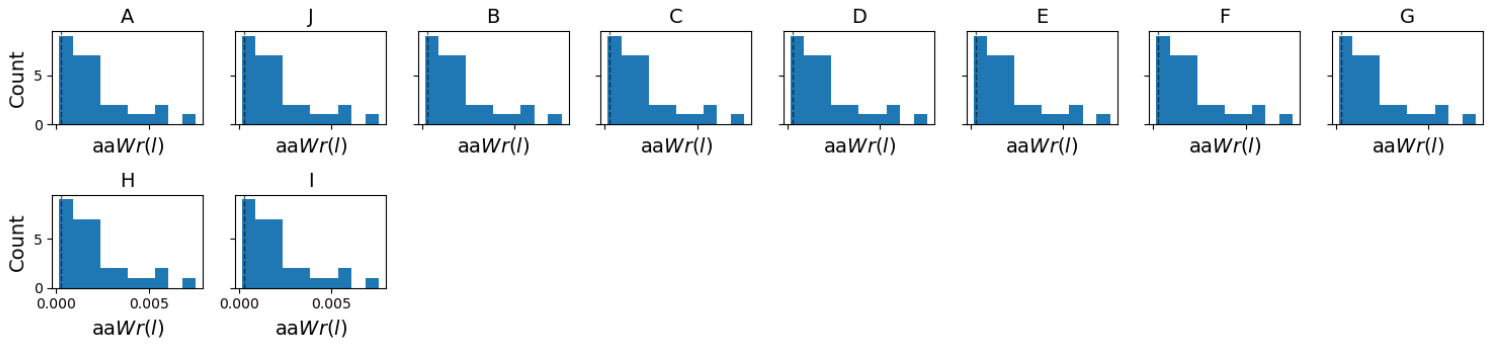

### 80lq (2-33): Aducanumab (3-7) epitope

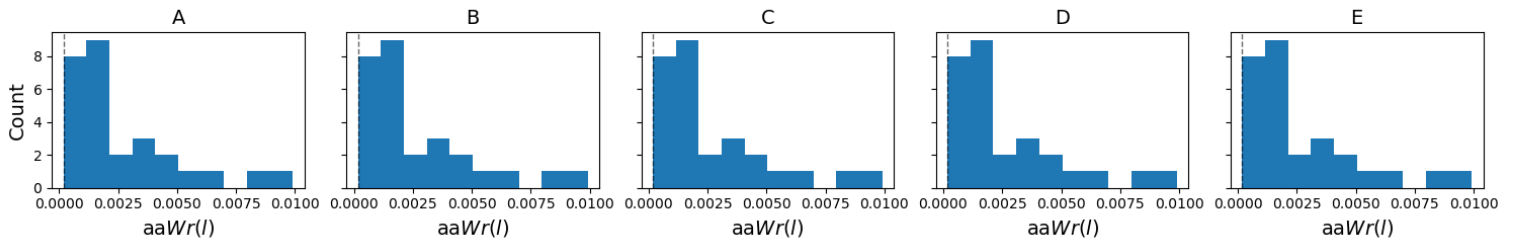

### 80t4 (1-37): Aducanumab (3-7) epitope

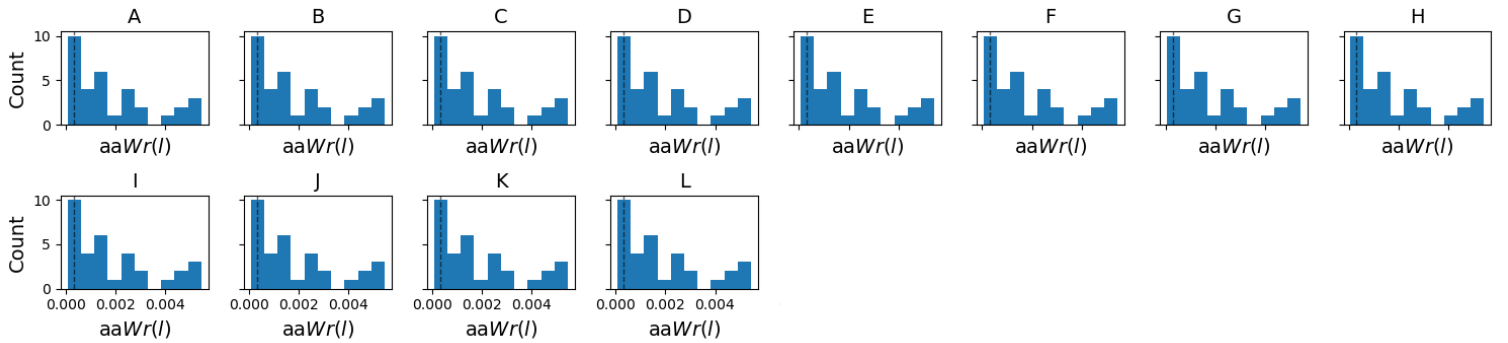

### 80vk (1-40): Aducanumab (3-7) epitope

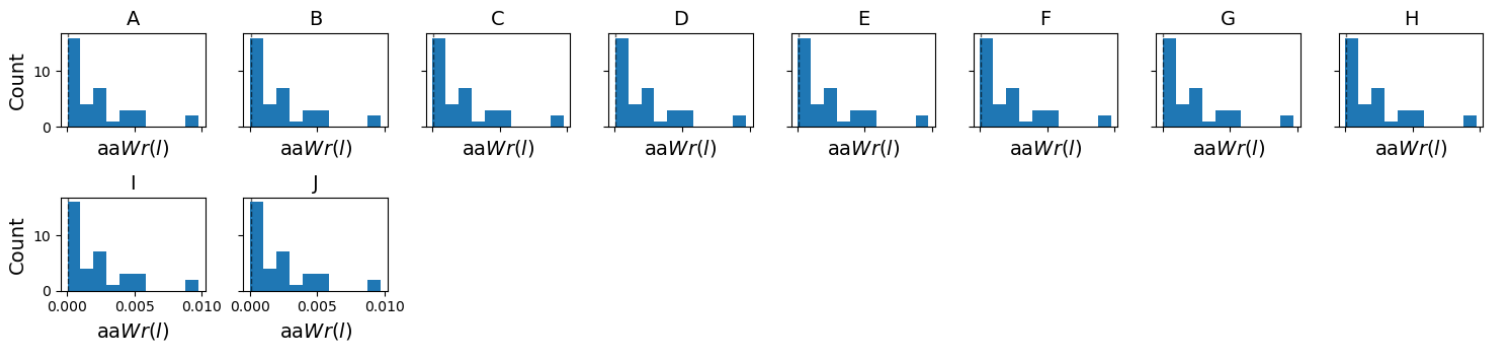

8owd (1-40): Aducanumab (3-7) epitope

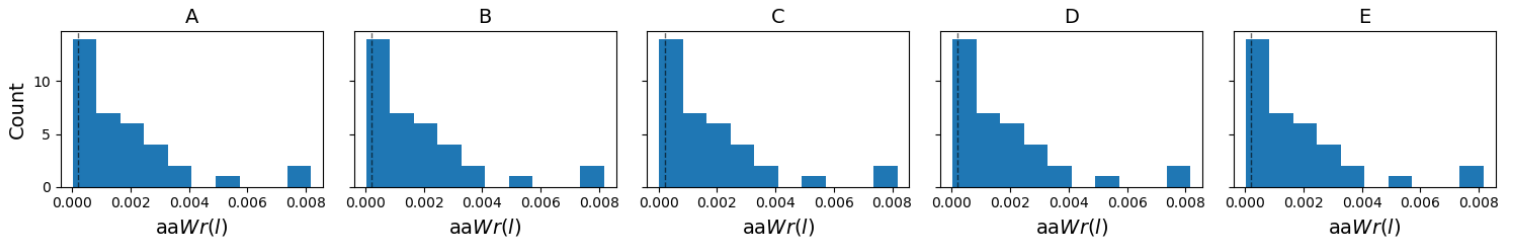

8owe (1-40): Aducanumab (3-7) epitope

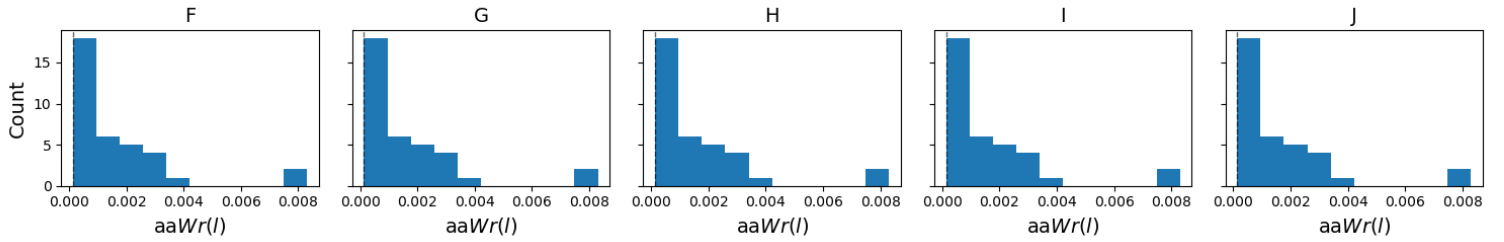

8owk (1-40): Aducanumab (3-7) epitope

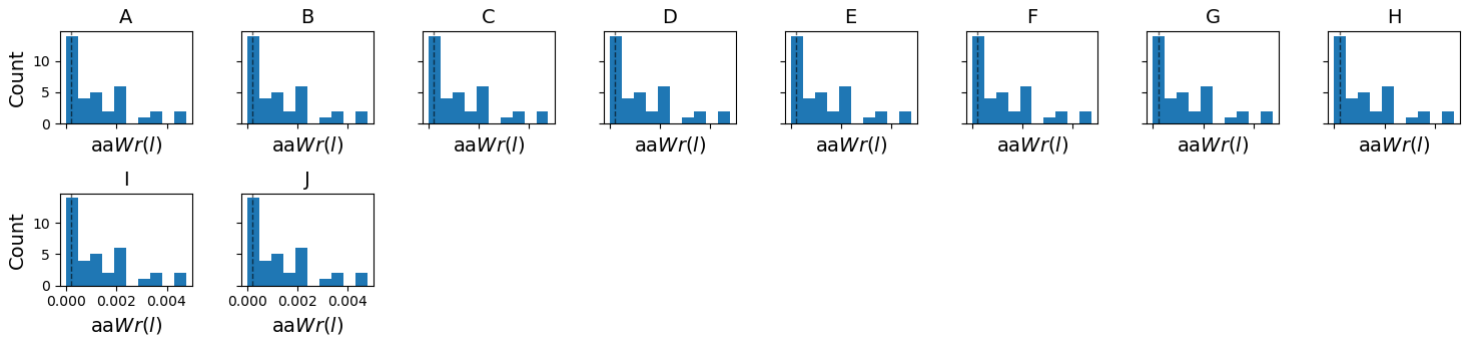

8qn6 (1-38): Aducanumab (3-7) epitope

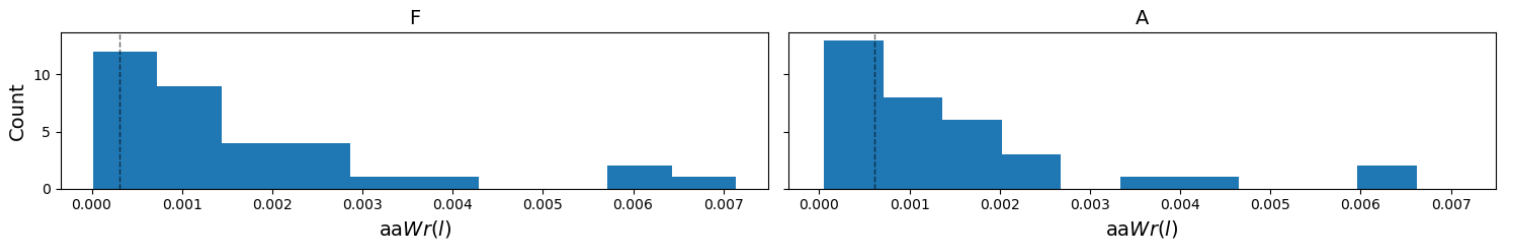

### 8qn7 (1-38): Aducanumab (3-7) epitope

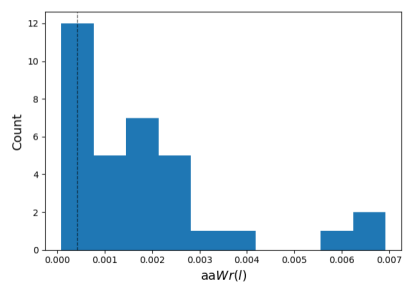

### 8sel (1-40): Aducanumab (3-7) epitope

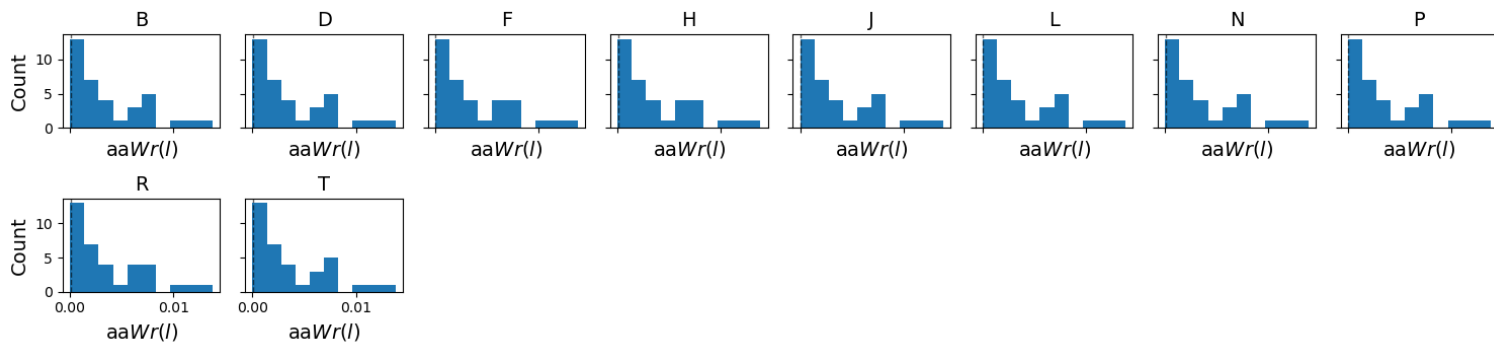

### 9jb2 (1-42): Aducanumab (3-7) epitope

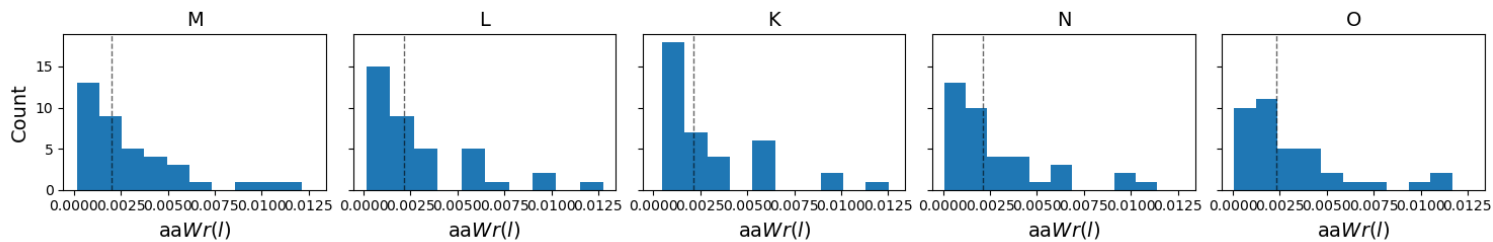

**d****2m4j (1-40): Donanemab (3-13) epitope**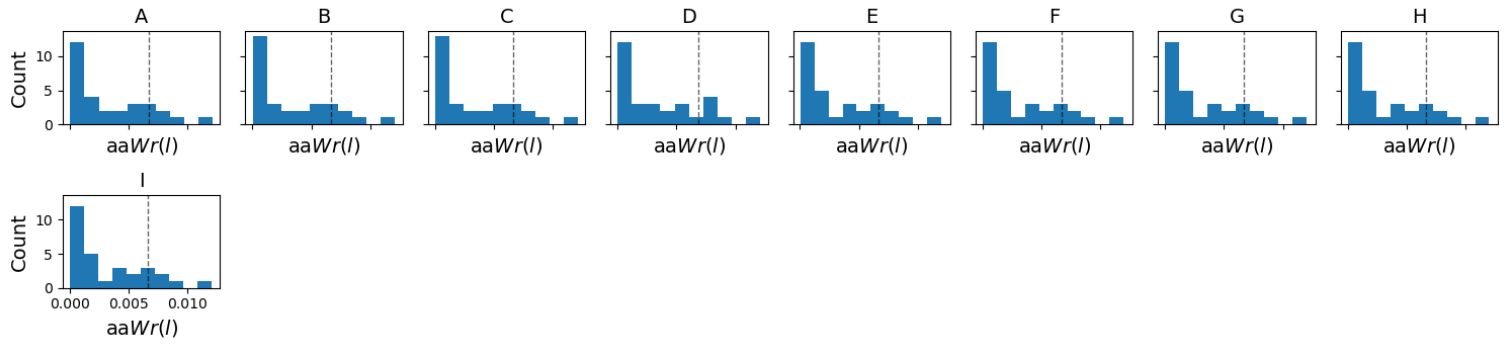**2nao (1-42): Donanemab (3-13) epitope**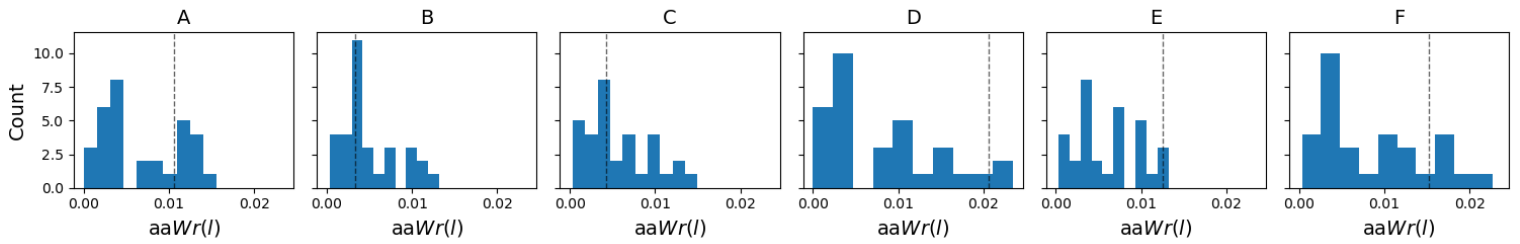**6shs (1-40): Donanemab (3-13) epitope**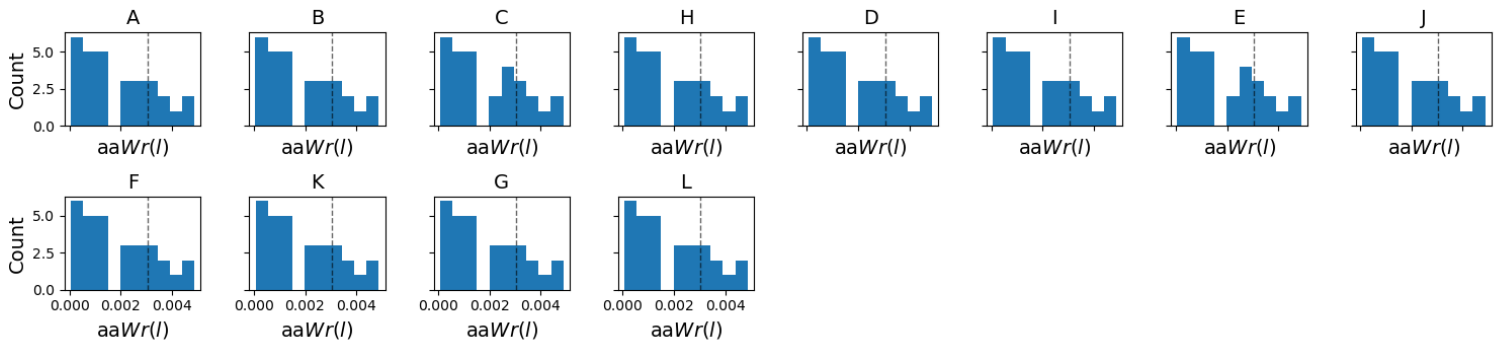**8bfa (1-38): Donanemab (3-13) epitope**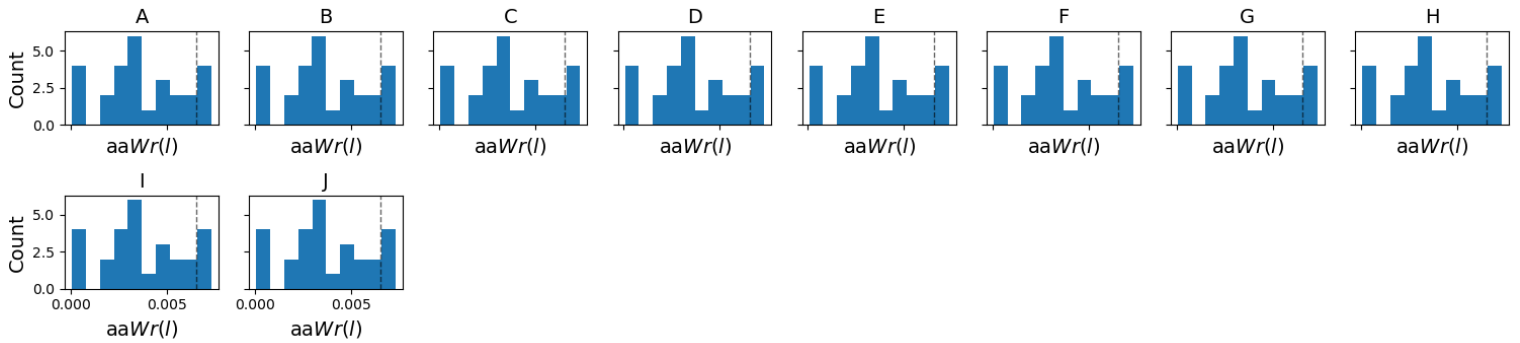

8bfb (1-38): Donanemab (3-13) epitope

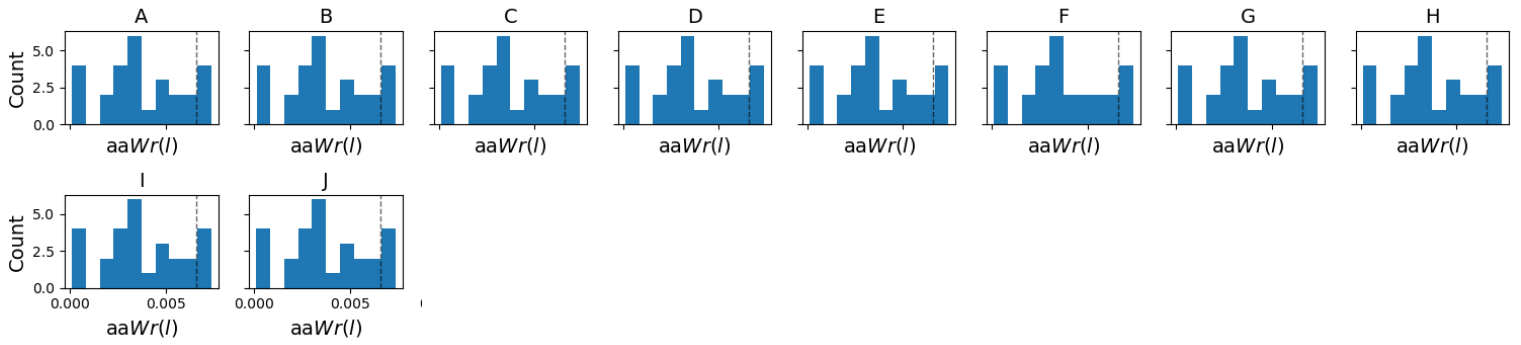

8bg9 (1-37): Donanemab (3-13) epitope

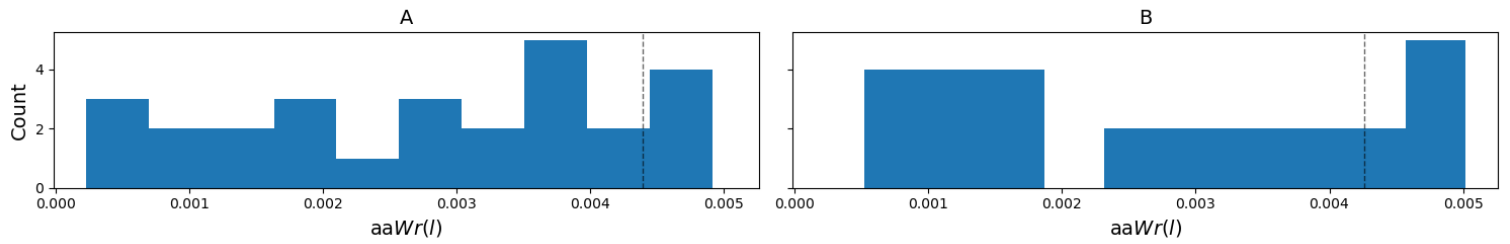

8eze (1-42): Donanemab (3-13) epitope

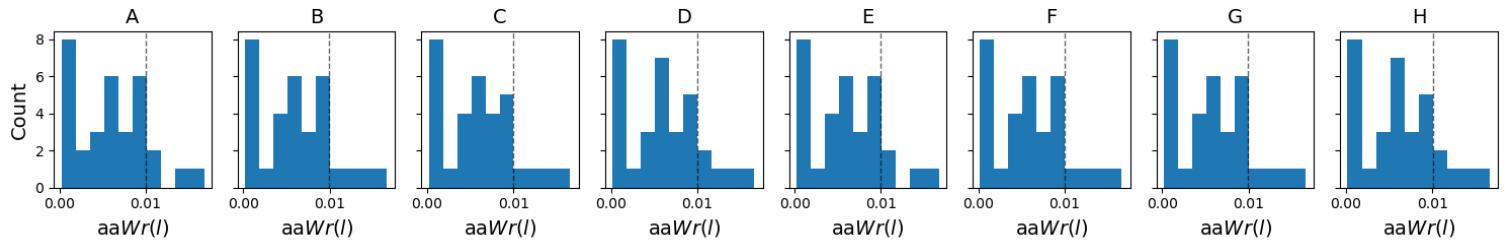

8olg (1-39): Donanemab (3-13) epitope

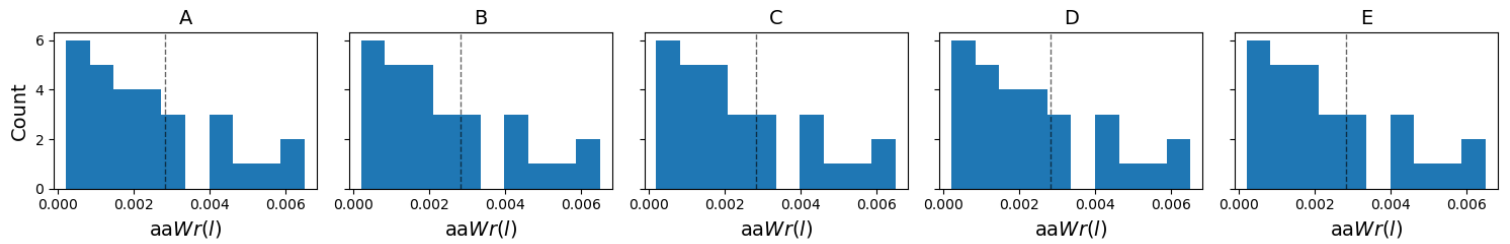

### 80ln (1-36): Donanemab (3-13) epitope

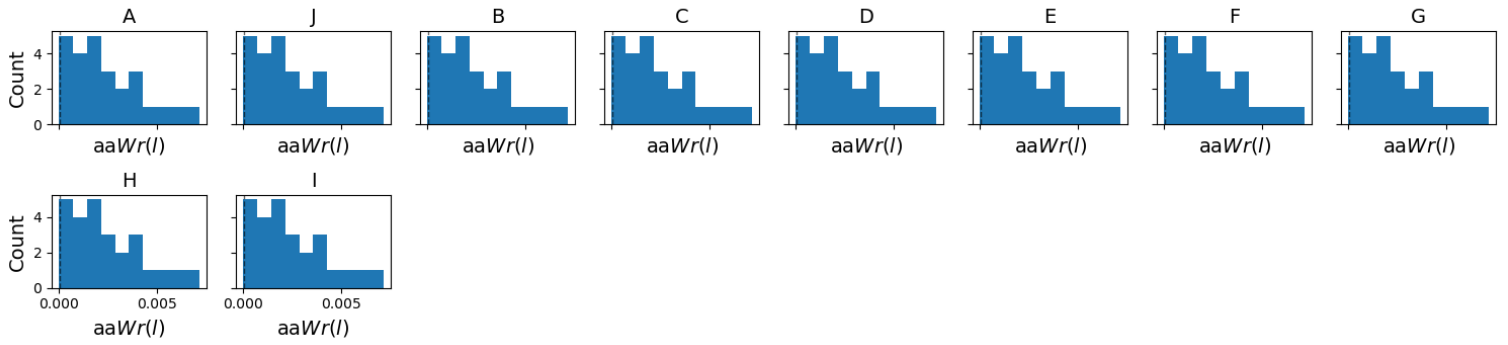

### 80lq (2-33): Donanemab (3-13) epitope

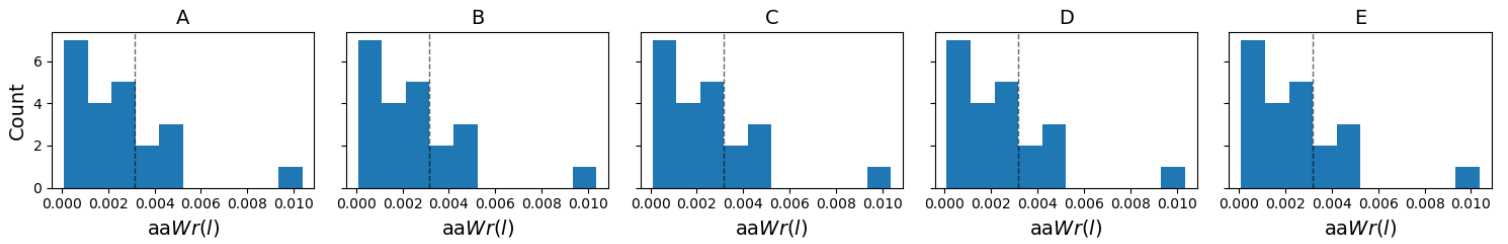

### 80t4 (1-37): Donanemab (3-13) epitope

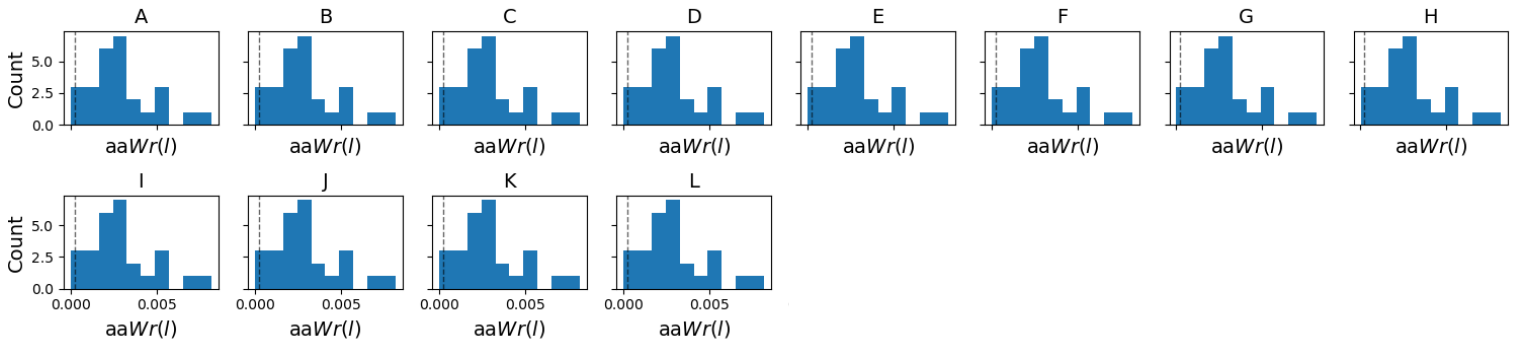

### 80vk (1-40): Donanemab (3-13) epitope

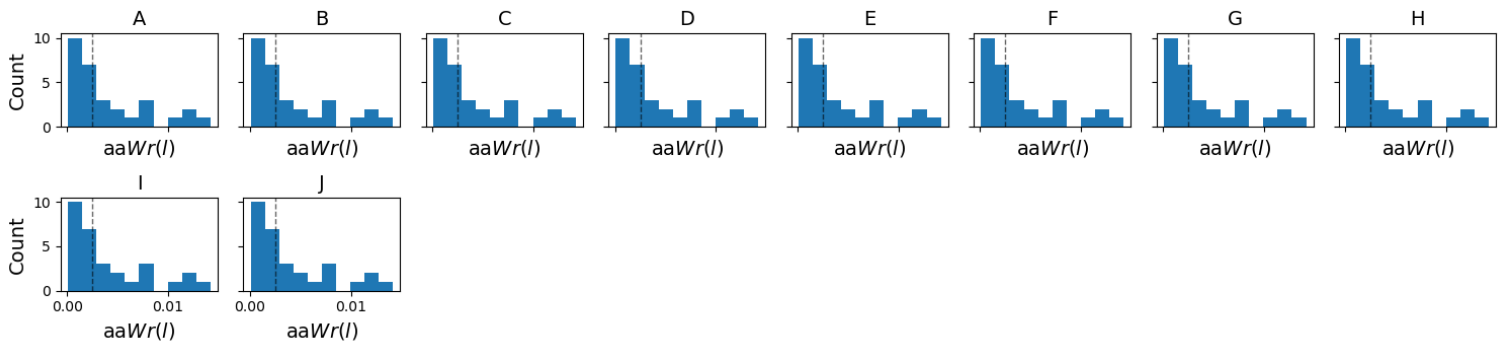

### 8owd (1-40): Donanemab (3-13) epitope

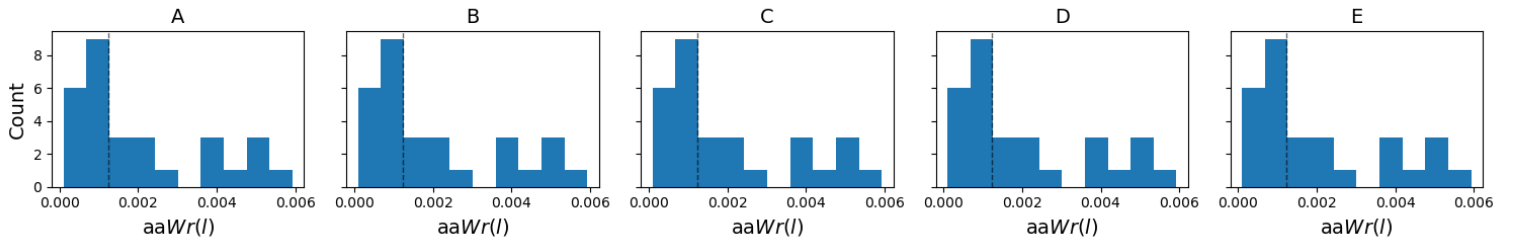

### 8owe (1-40): Donanemab (3-13) epitope

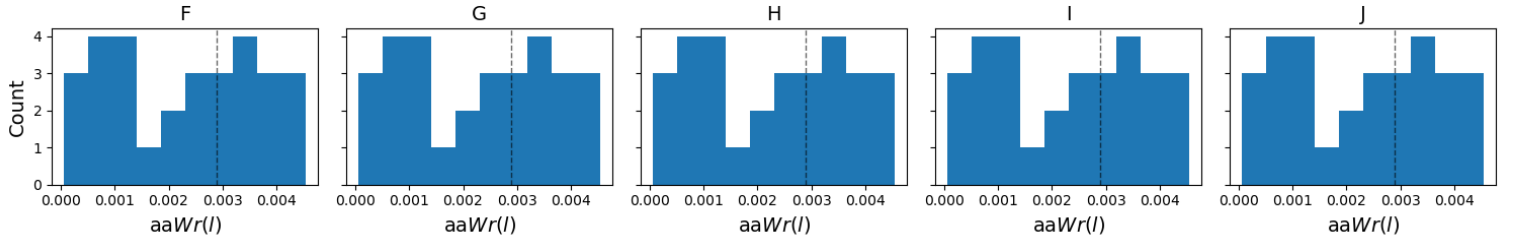

### 8owk (1-40): Donanemab (3-13) epitope

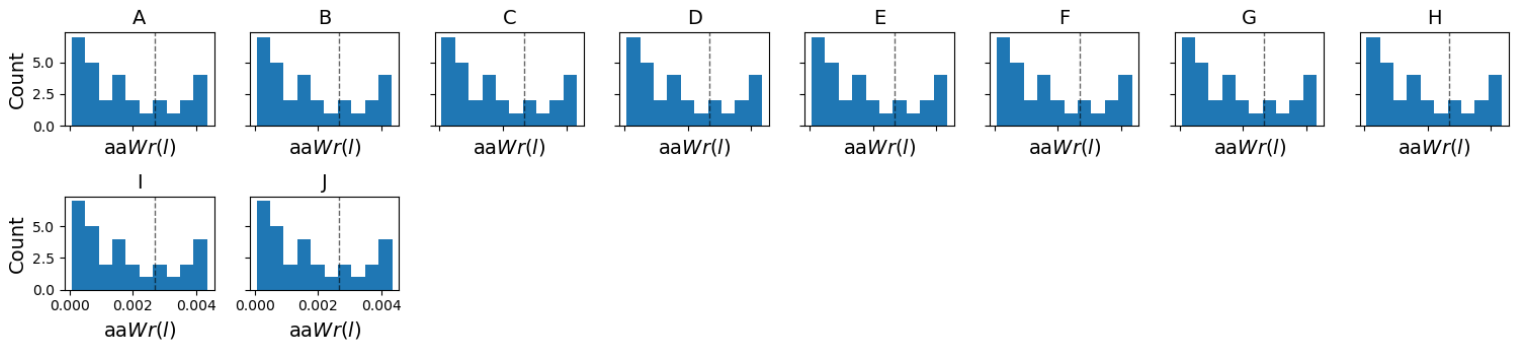

### 8qn6 (1-38): Donanemab (3-13) epitope

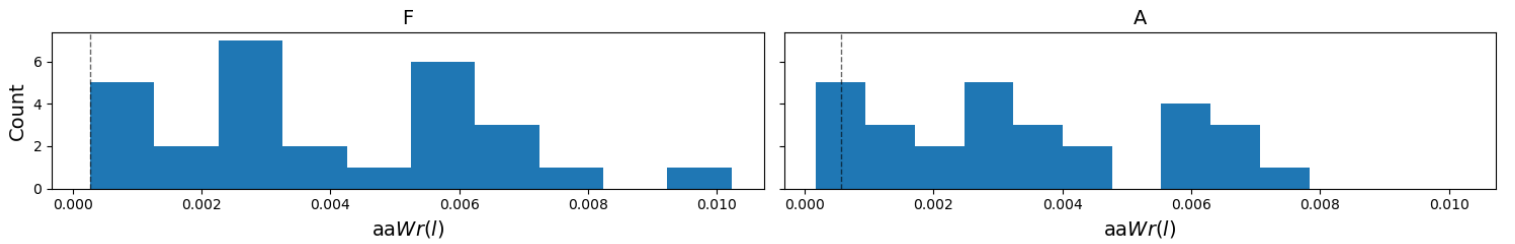

8qn7 (1-38): Donanemab (3-13) epitope

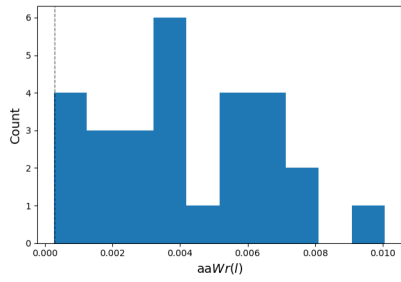

8sel (1-40): Donanemab (3-13) epitope

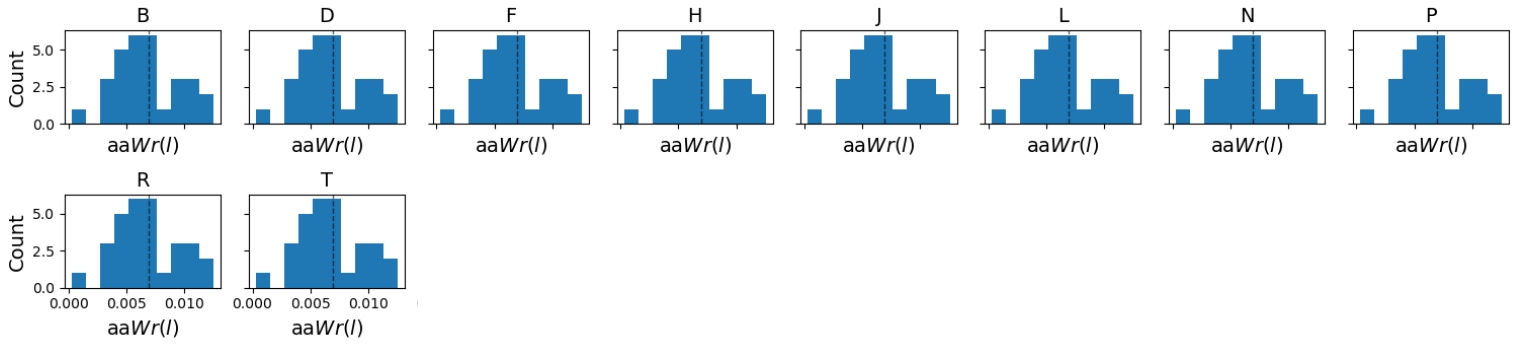

9jb2 (1-42): Donanemab (3-13) epitope

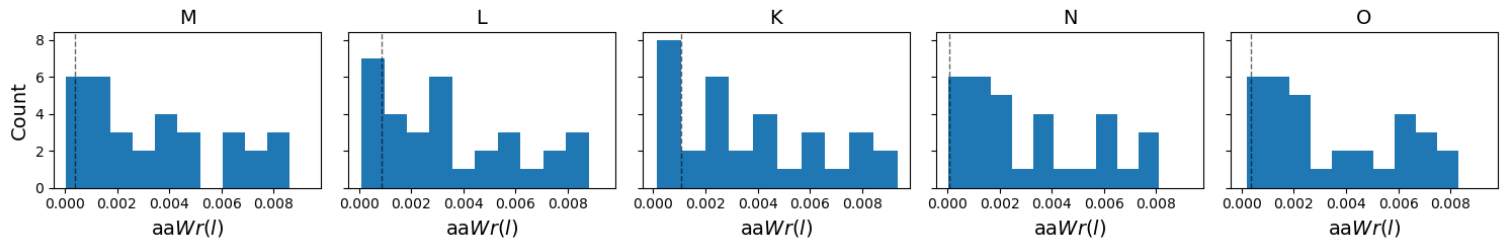

**e****2m4j (1-40): Gantenerumab (3-11) epitope**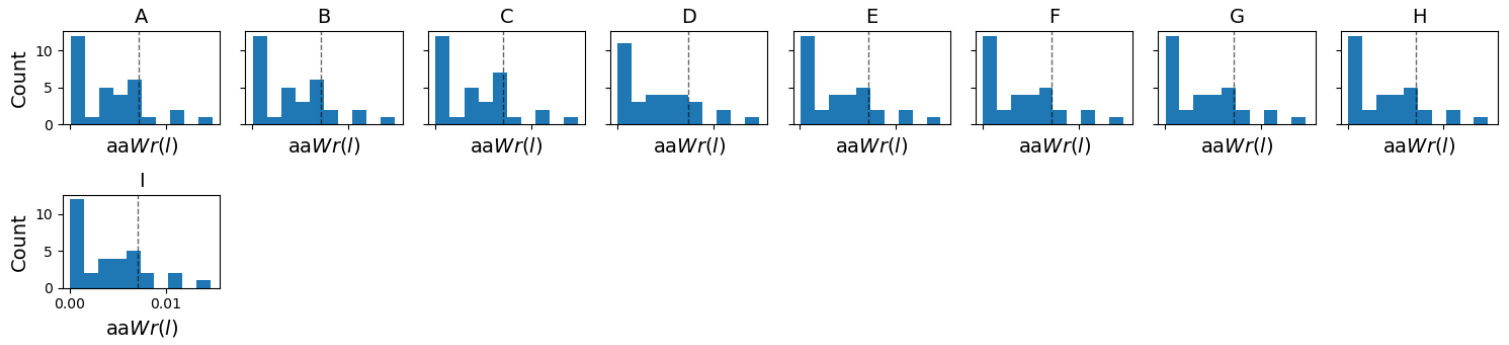**2nao (1-42): Gantenerumab (3-11) epitope**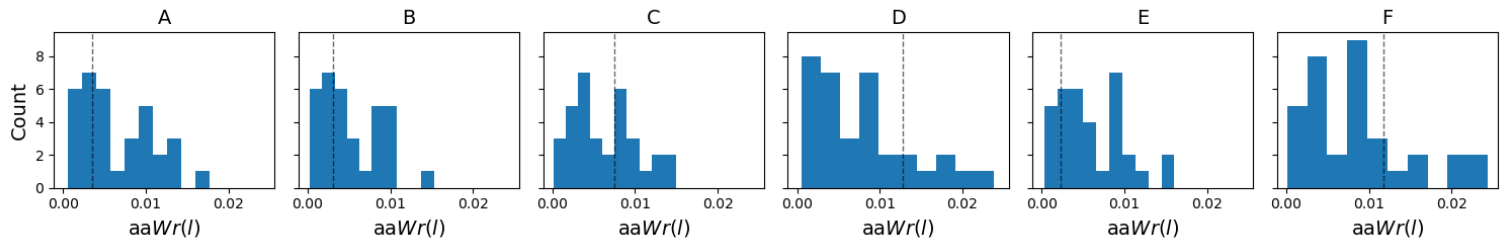**6shs (1-40): Gantenerumab (3-11) epitope**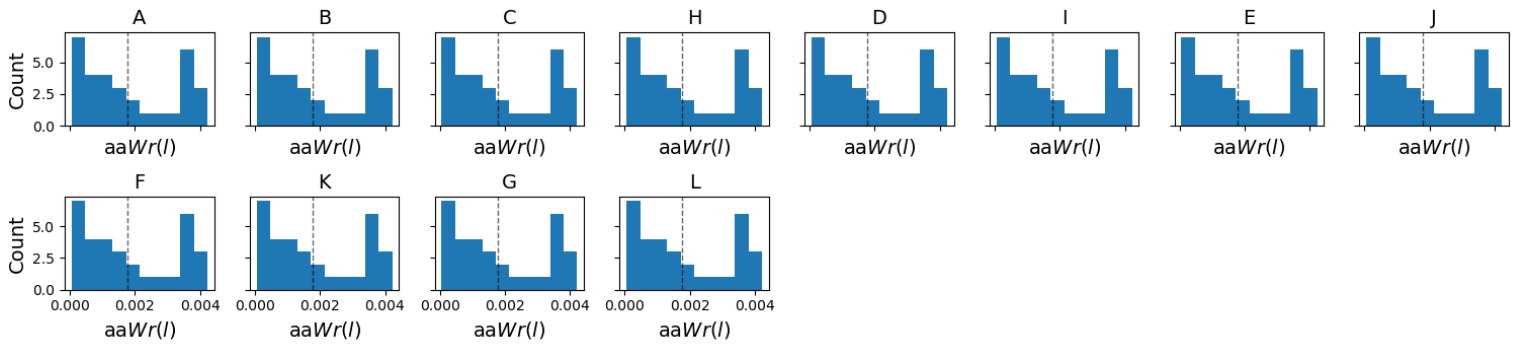**8bfa (1-38): Gantenerumab (3-11) epitope**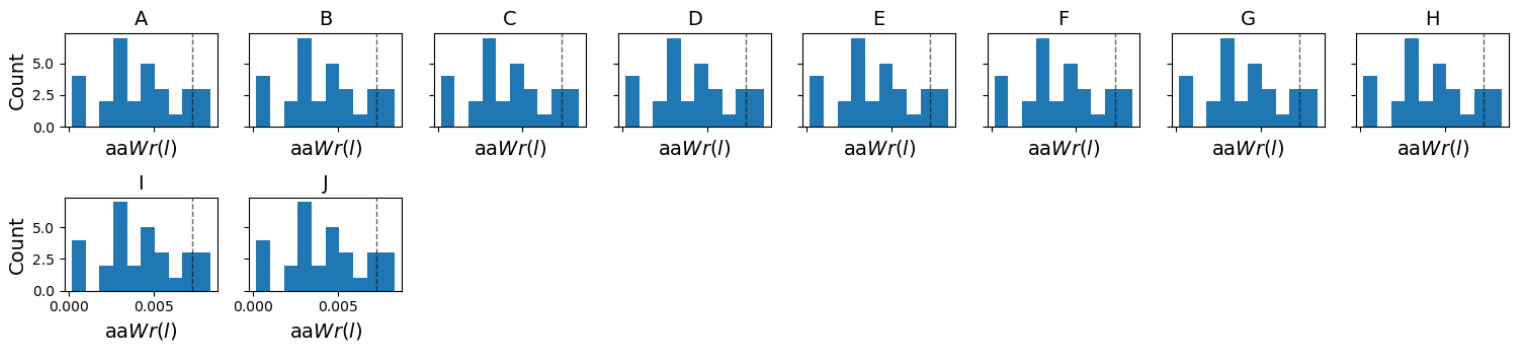

### 8bfb (1-38): Gantenerumab (3-11) epitope

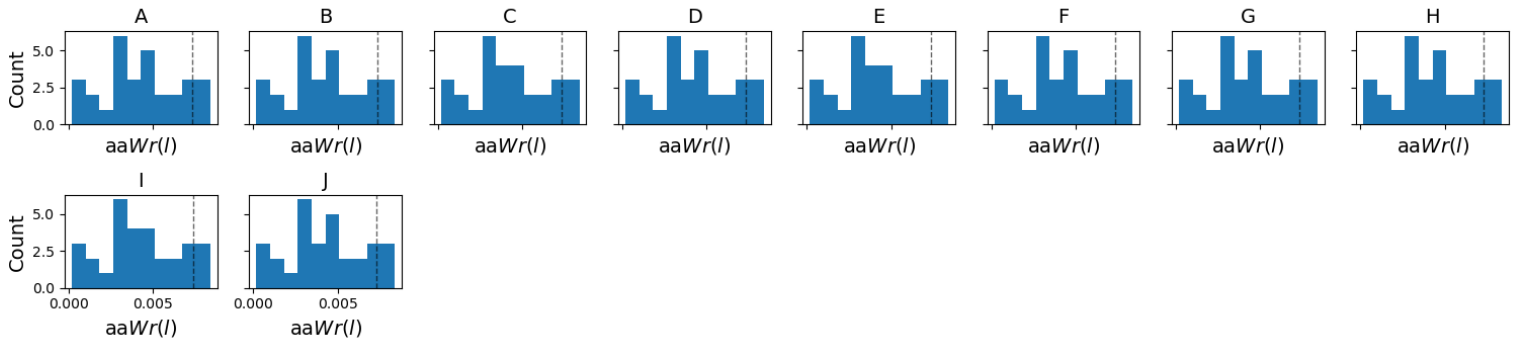

### 8bg9 (1-37): Gantenerumab (3-11) epitope

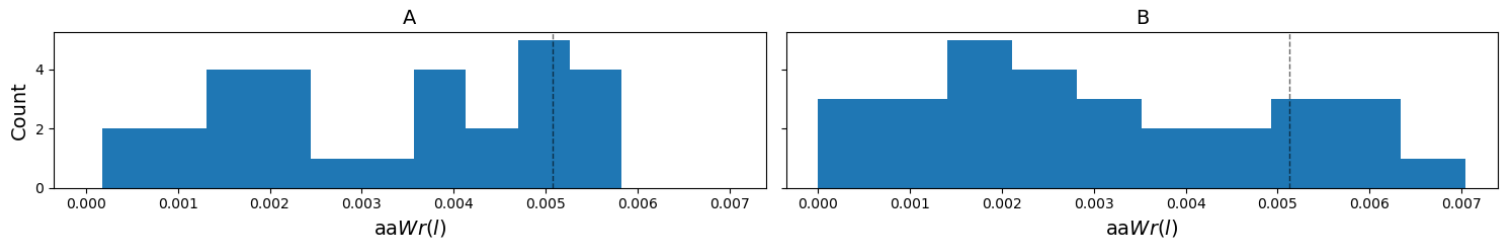

### 8eze (1-42): Gantenerumab (3-11) epitope

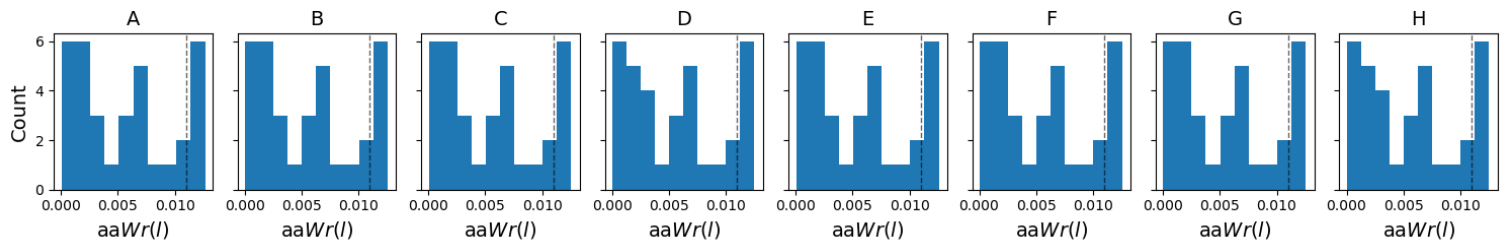

### 8olg (1-39): Gantenerumab (3-11) epitope

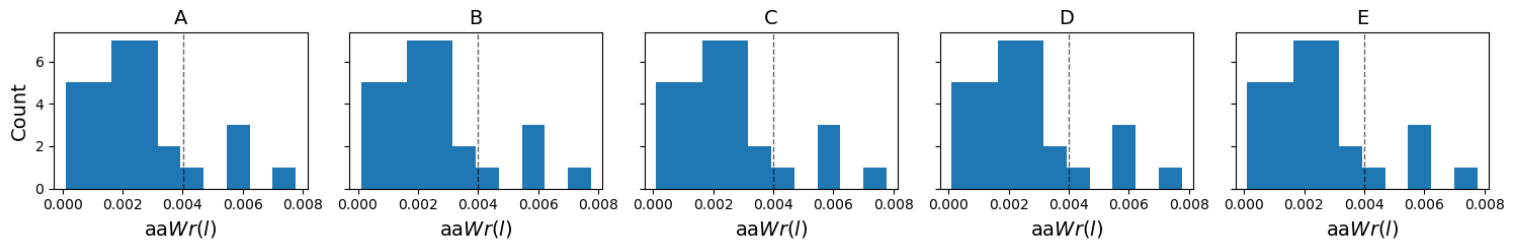

### 80ln (1-36): Gantenerumab (3-11) epitope

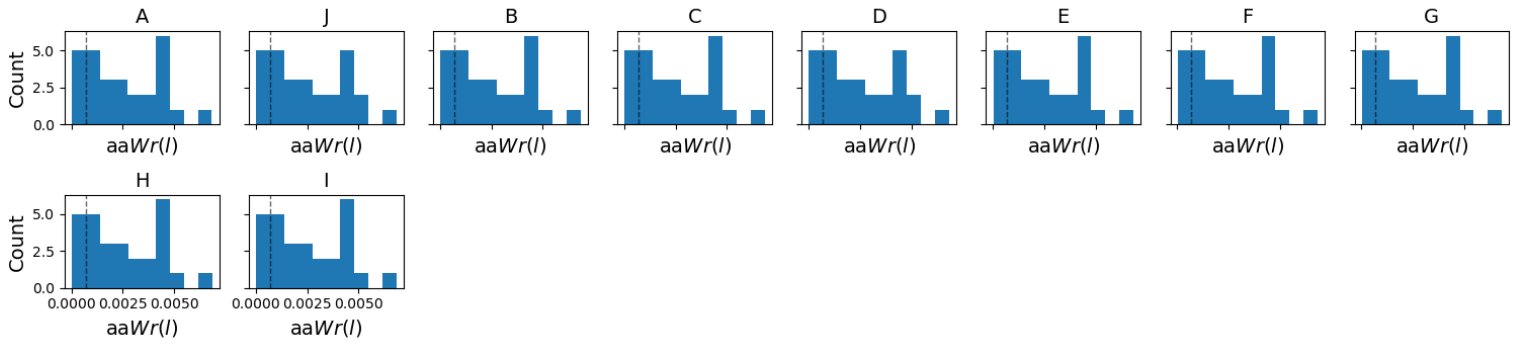

### 80lq (2-33): Gantenerumab (3-11) epitope

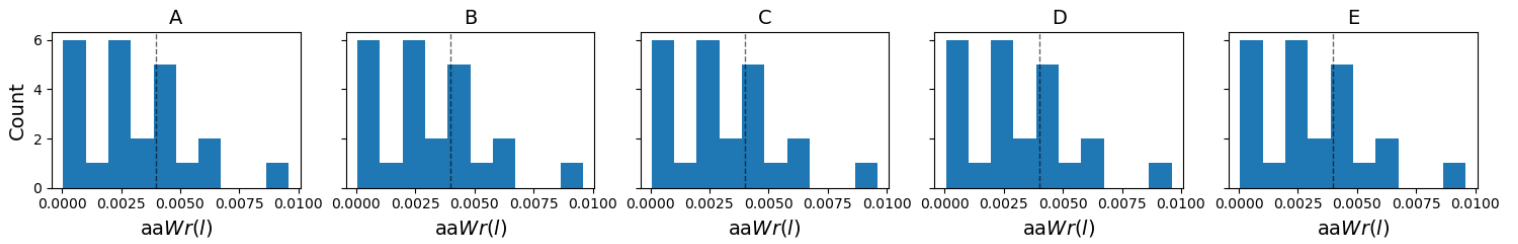

### 80t4 (1-37): Gantenerumab (3-11) epitope

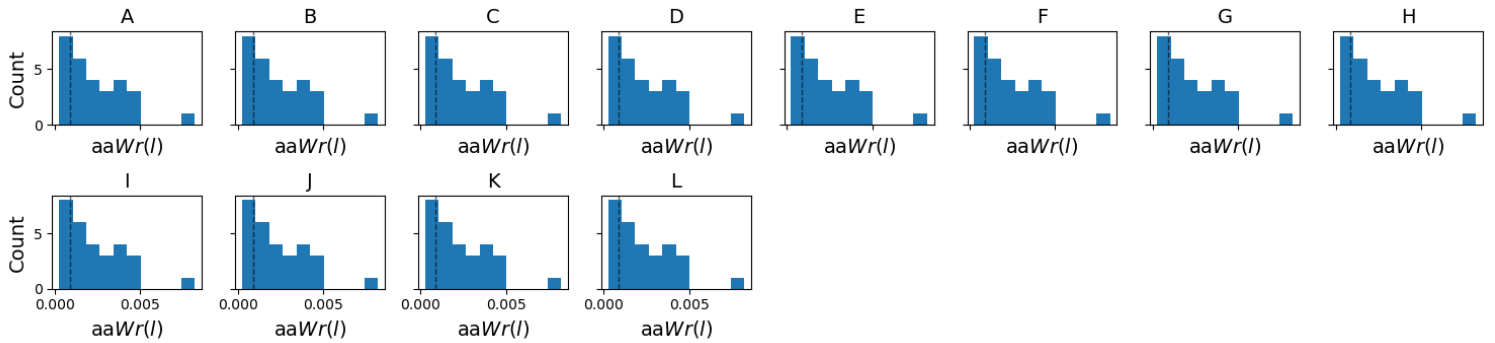

### 80vk (1-40): Gantenerumab (3-11) epitope

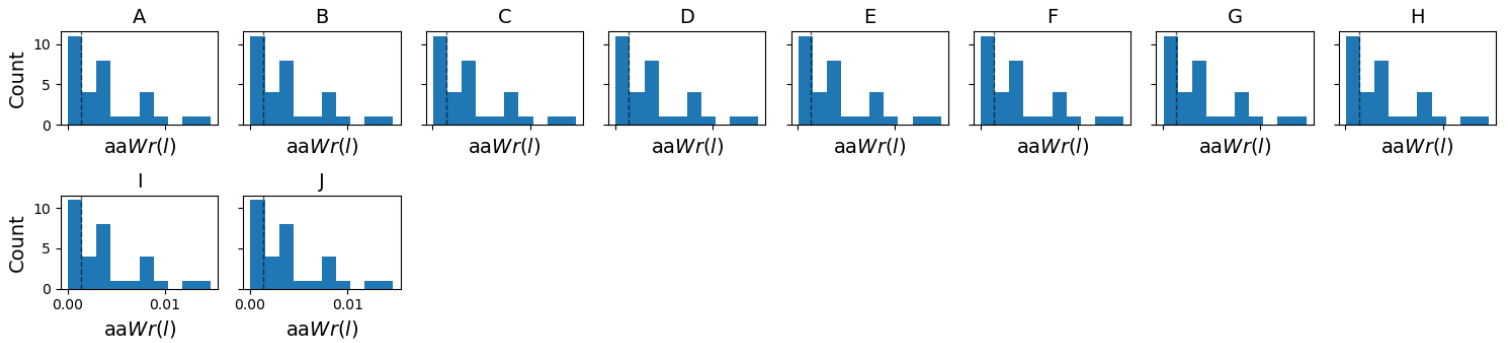

### 8owd (1-40): Gantenerumab (3-11) epitope

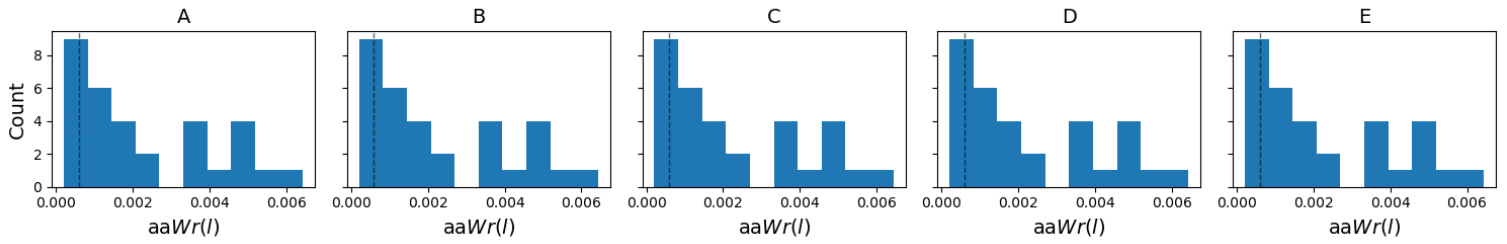

### 8owe (1-40): Gantenerumab (3-11) epitope

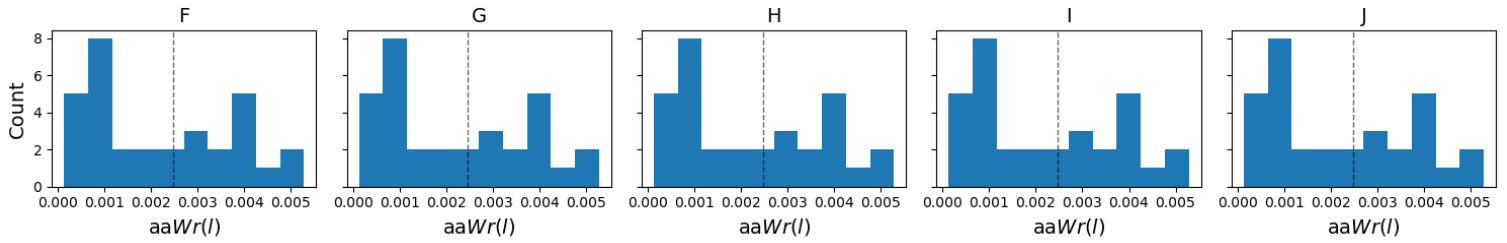

### 8owk (1-40): Gantenerumab (3-11) epitope

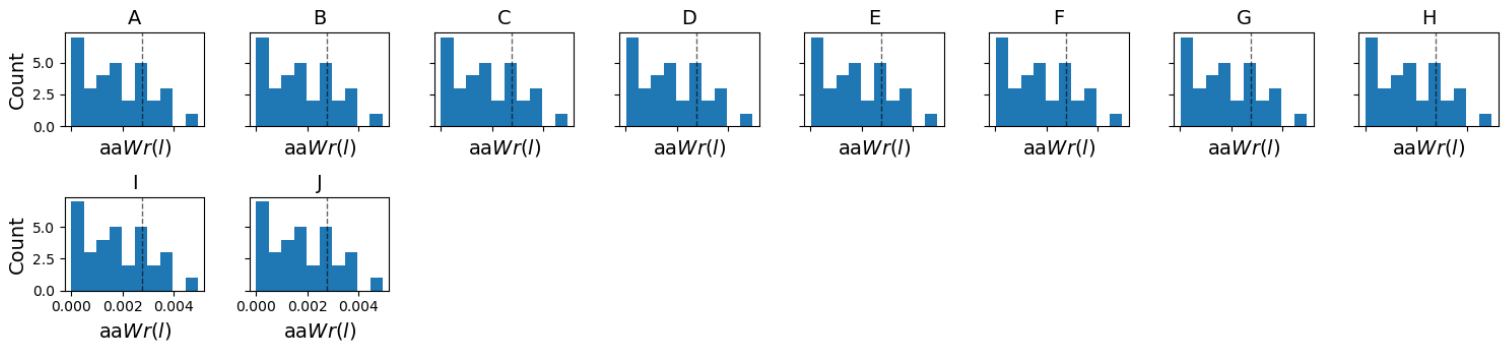

### 8qn6 (1-38): Gantenerumab (3-11) epitope

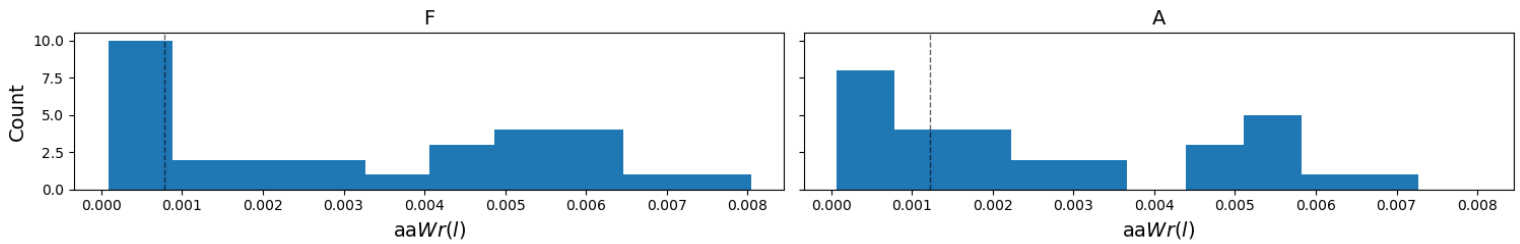

### 8qn7 (1-38): Gantenerumab (3-11) epitope

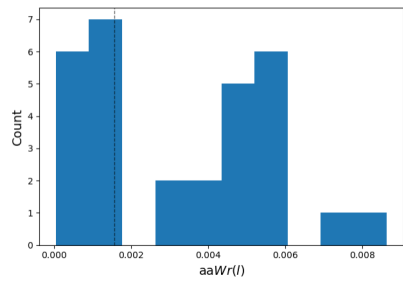

### 8sel (1-40): Gantenerumab (3-11) epitope

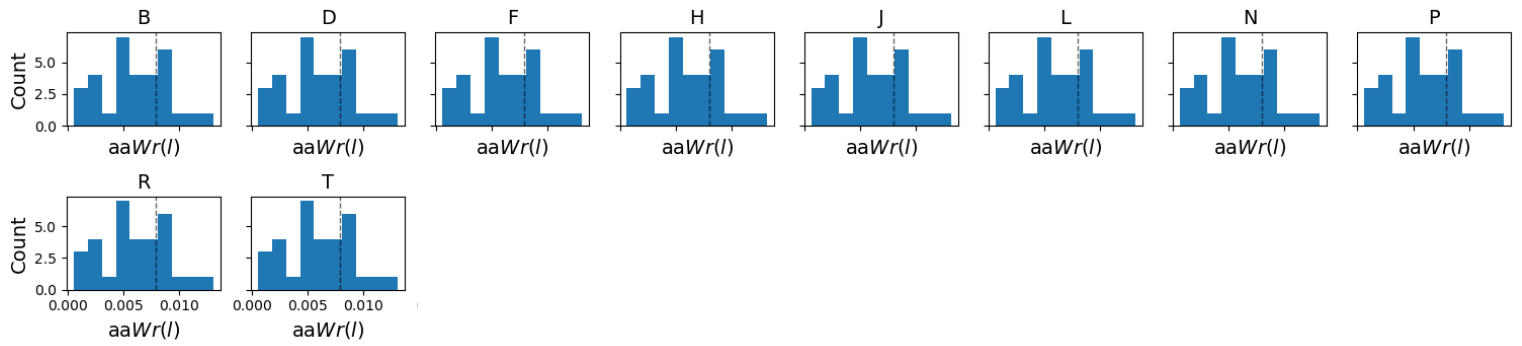

### 9jb2 (1-42): Gantenerumab (3-11) epitope

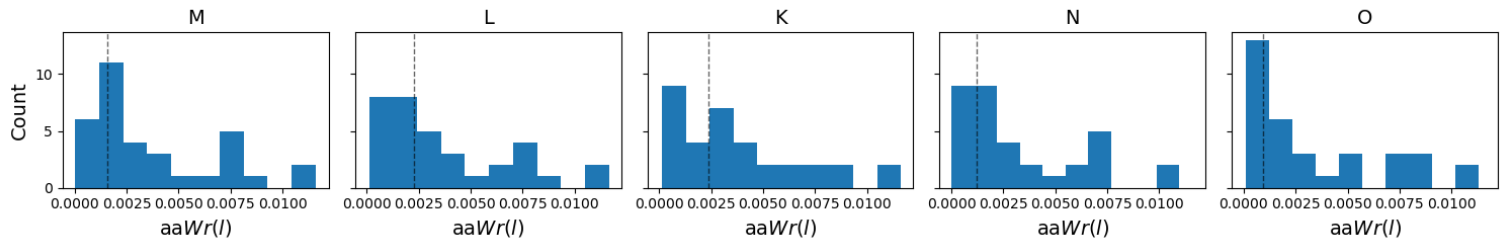

**f****2beg (17-42): Gantenerumab (18-27) epitope**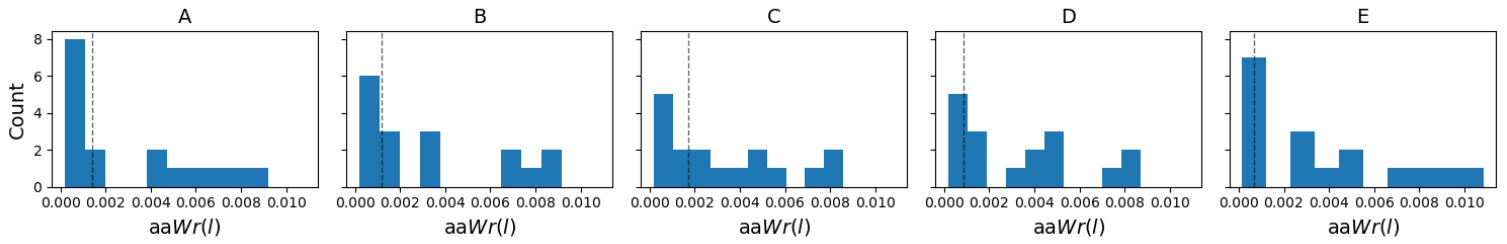**2lmn (9-40): Gantenerumab (18-27) epitope**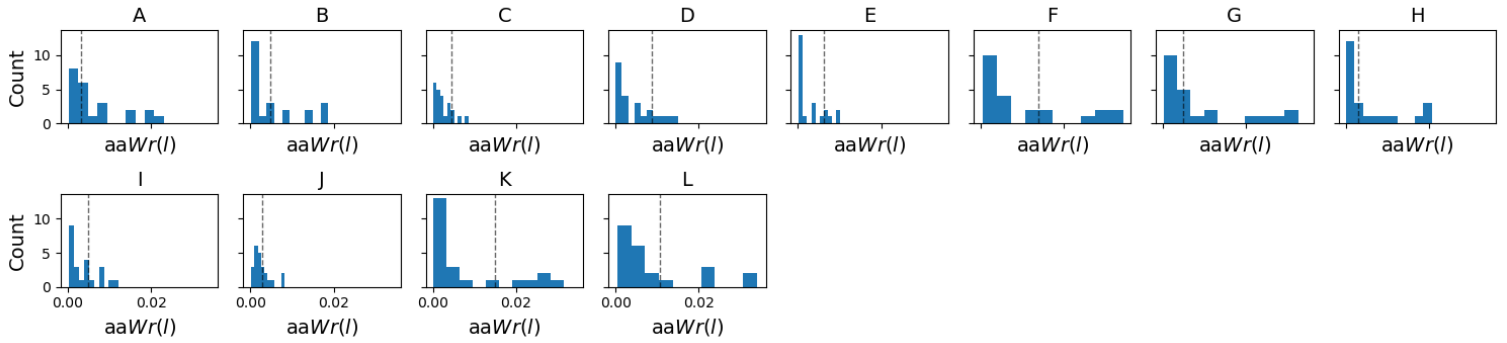**2lmo (9-40): Gantenerumab (18-27) epitope**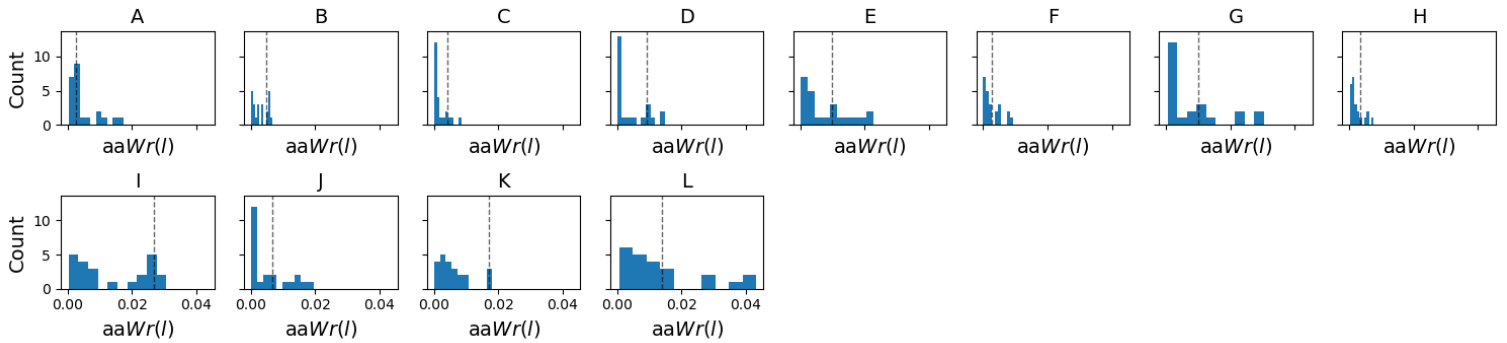**2lmp (9-40): Gantenerumab (18-27) epitope**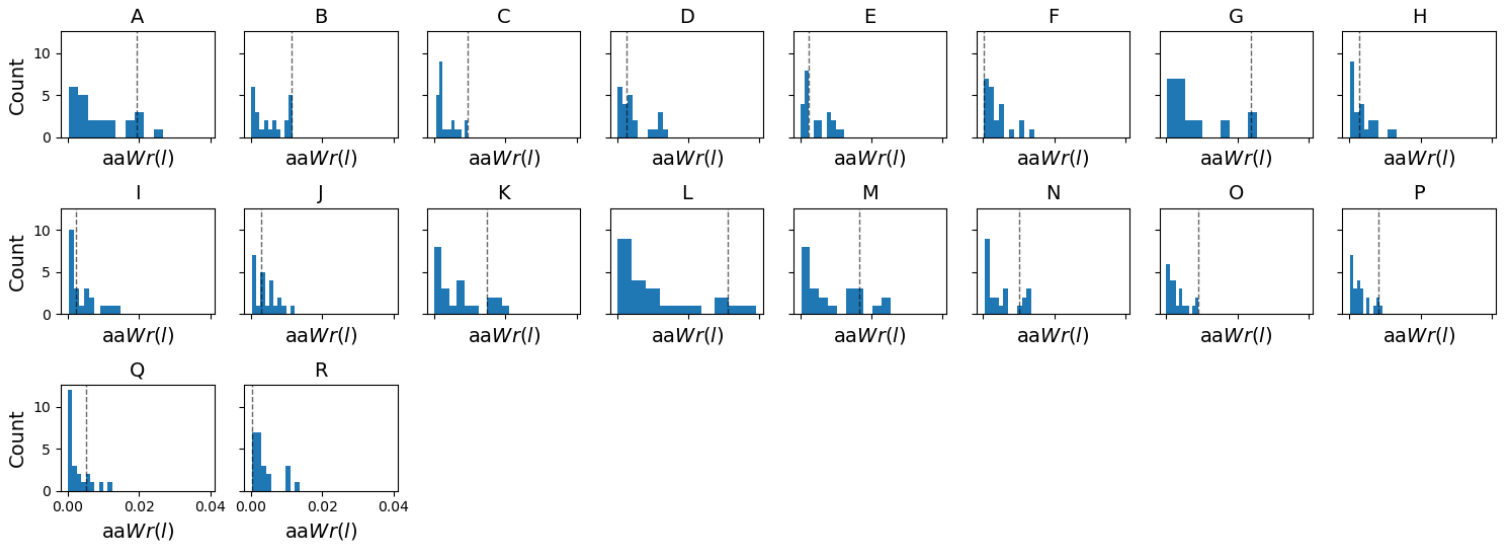

### 2Imq (9-40): Gantenerumab (18-27) epitope

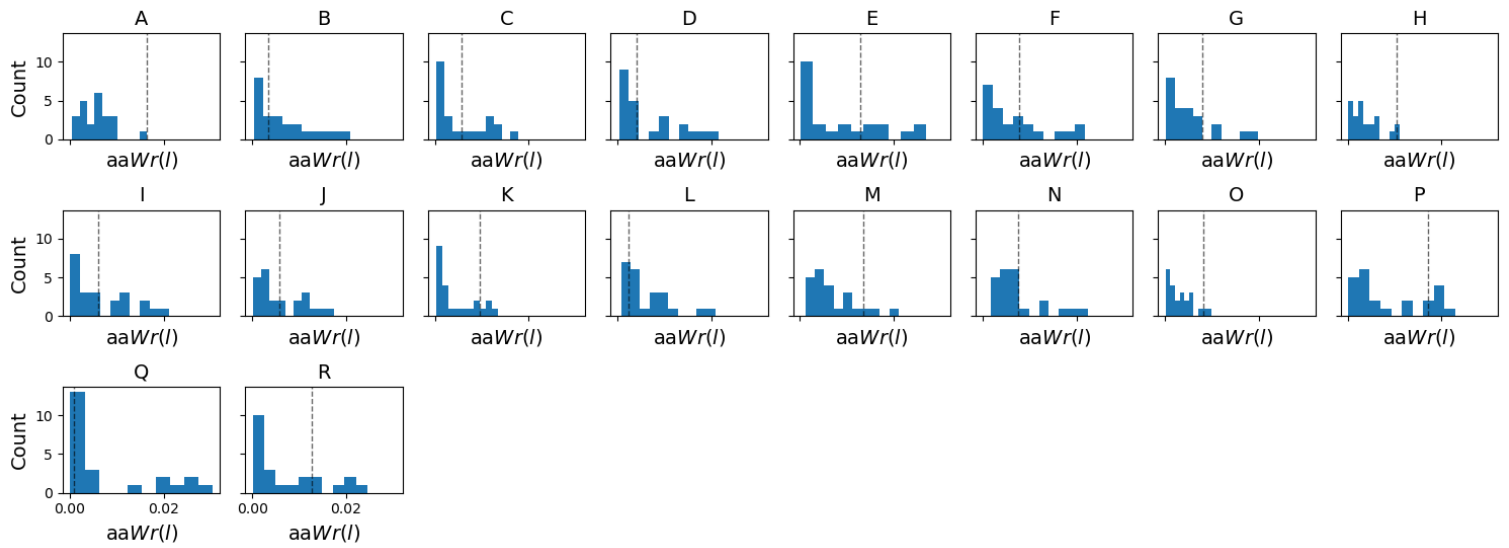

### 2Inq (15-40): Gantenerumab (18-27) epitope

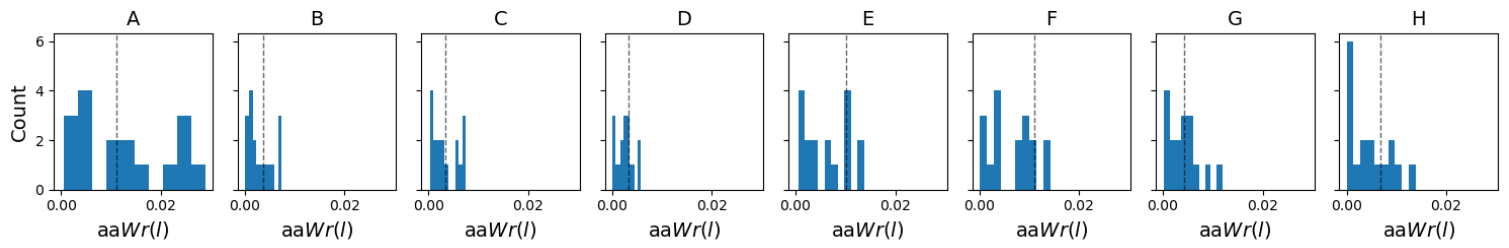

### 2m4j (1-40): Gantenerumab (18-27) epitope

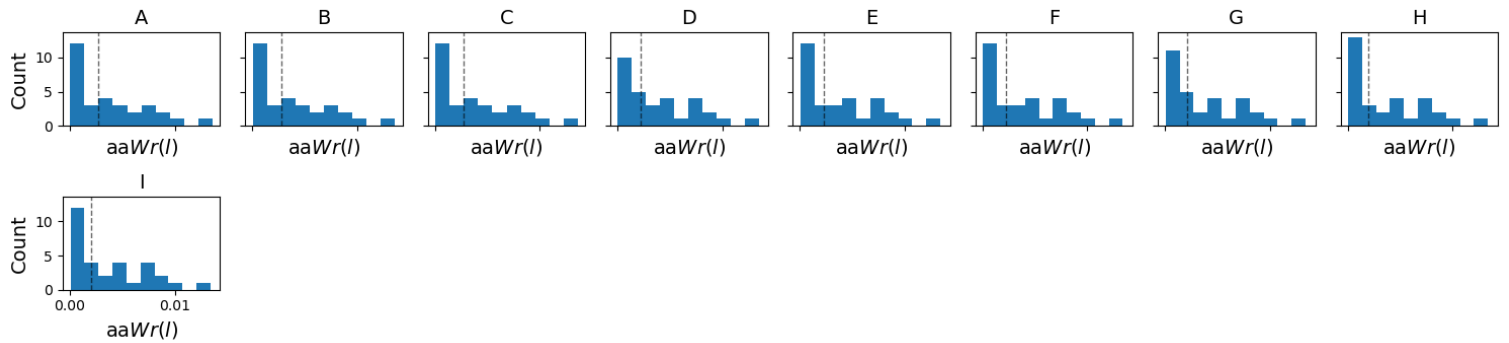

### 2mpz (15-40): Gantenerumab (18-27) epitope

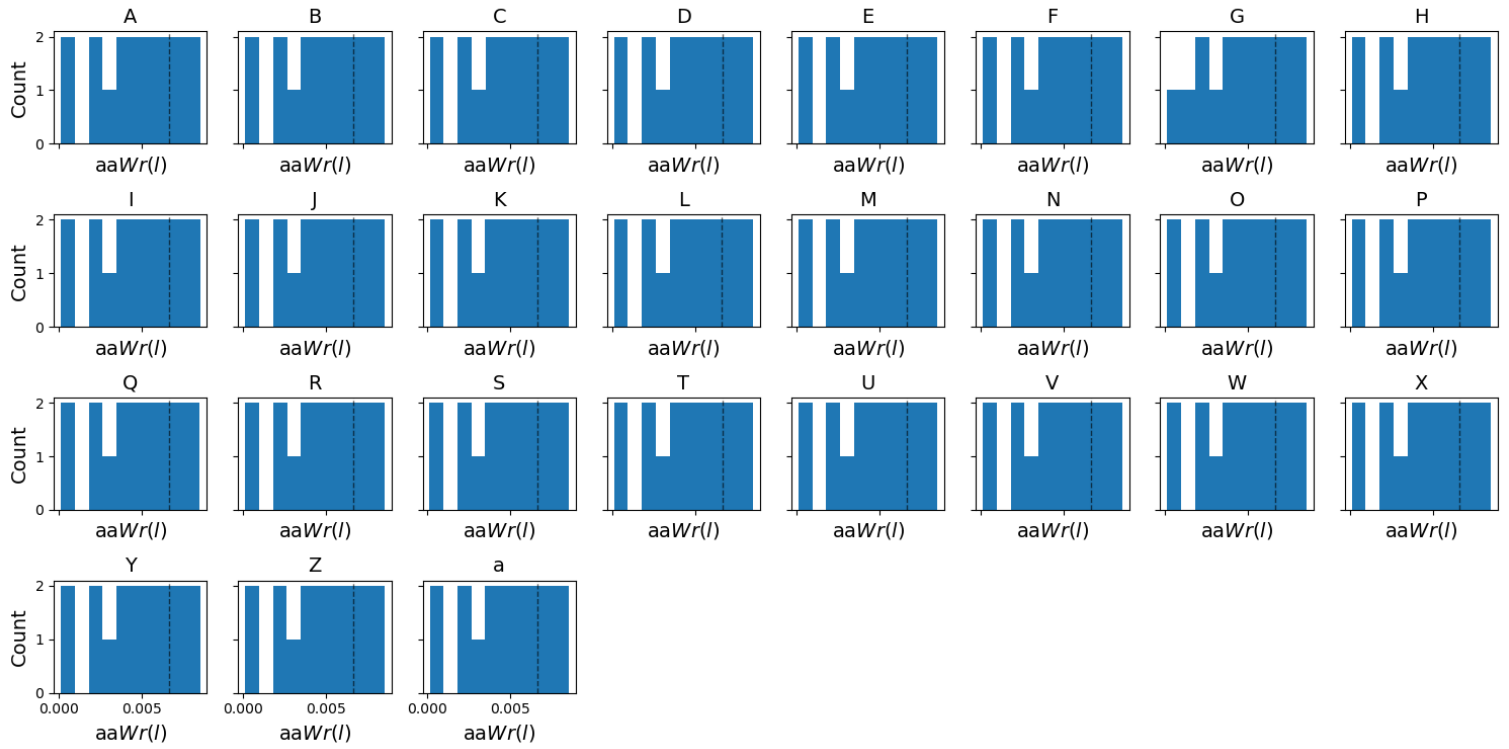

### 2mxu (11-42): Gantenerumab (18-27) epitope

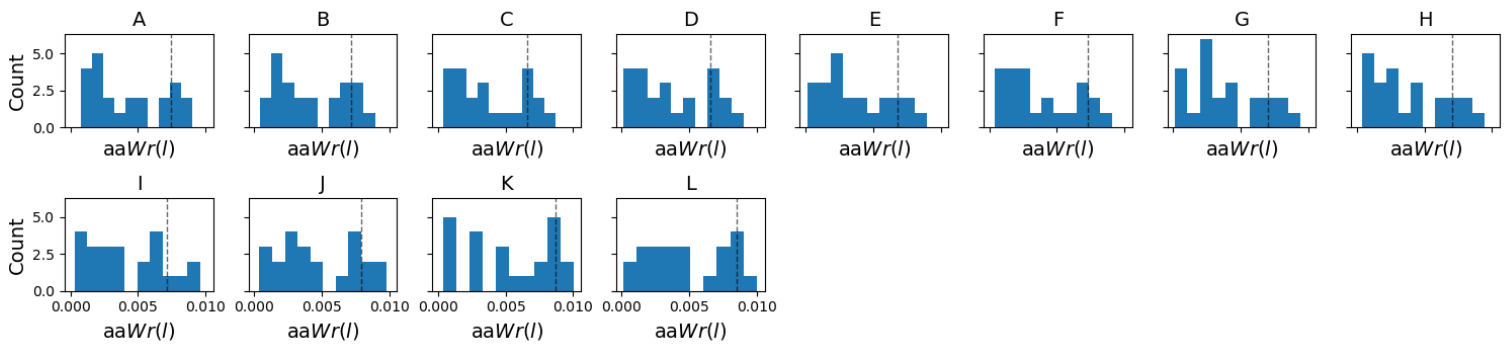

### 2nao (1-42): Gantenerumab (18-27) epitope

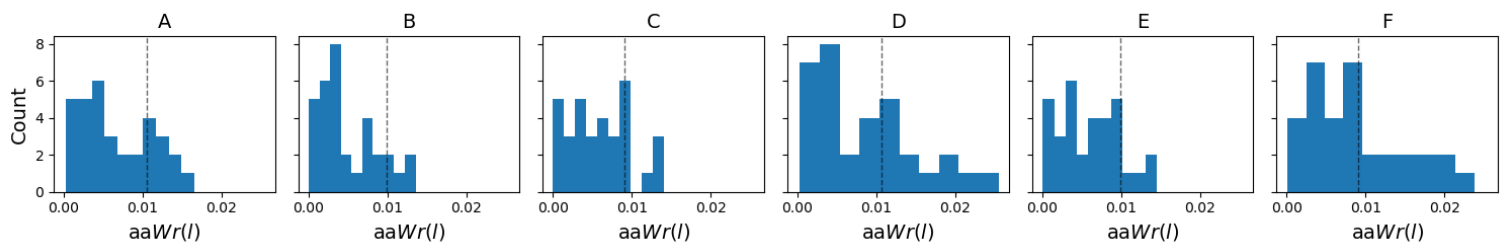

5kk3 (11-42): Gantenerumab (18-27) epitope

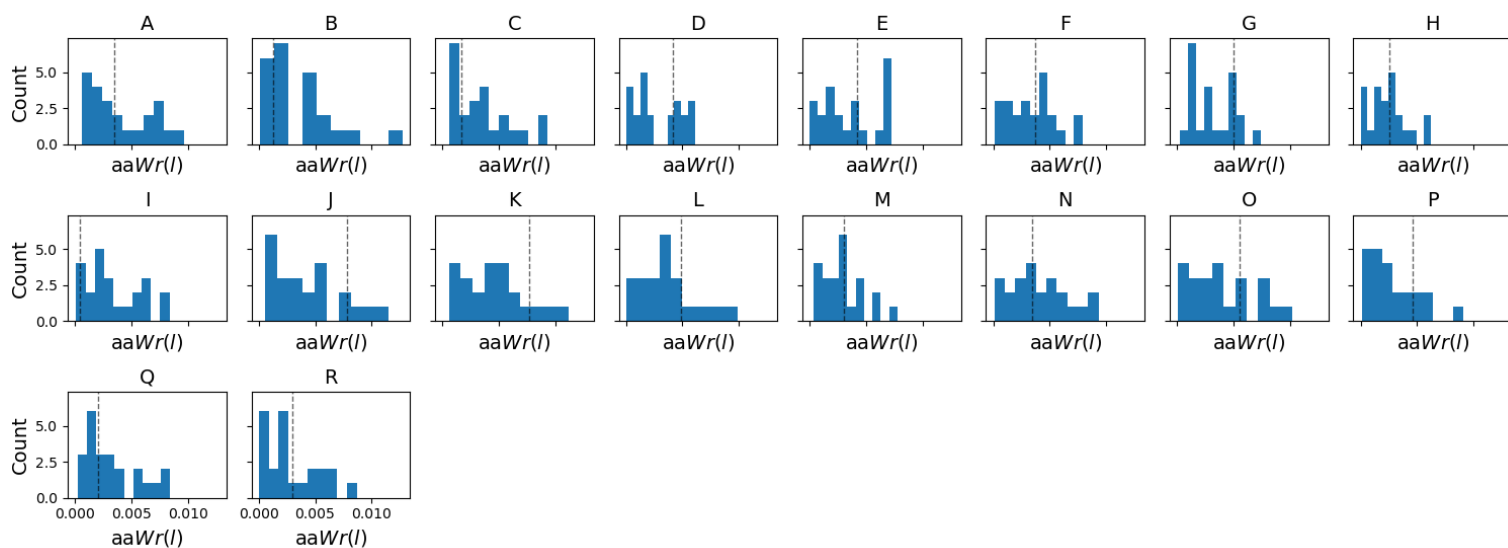

6shs (1-40): Gantenerumab (18-27) epitope

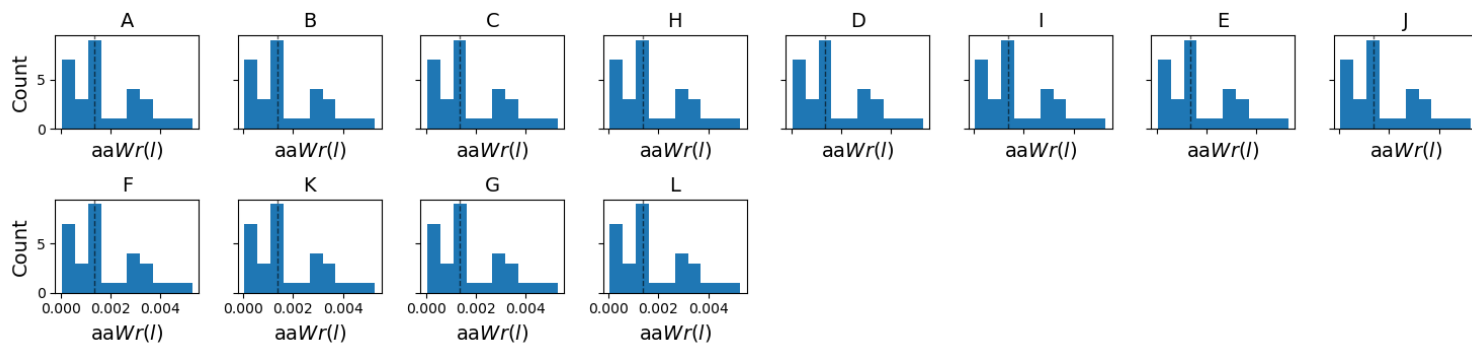

6ti5 (11-40): Gantenerumab (18-27) epitope

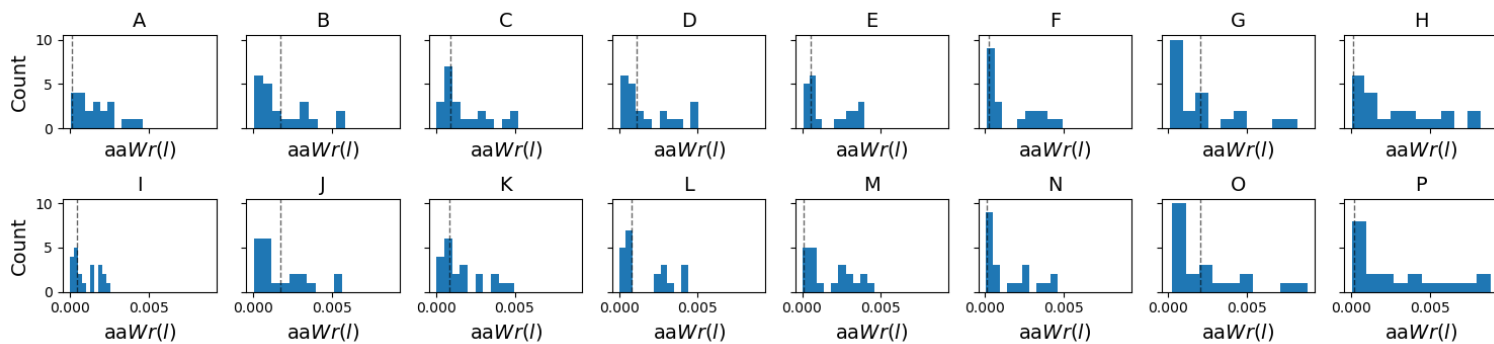

6ti6 (11-42): Gantenerumab (18-27) epitope

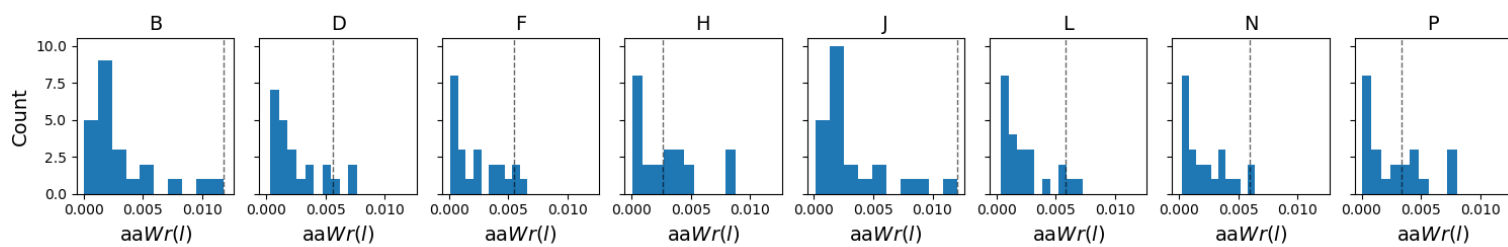

6w0o (10-40): Gantenerumab (18-27) epitope

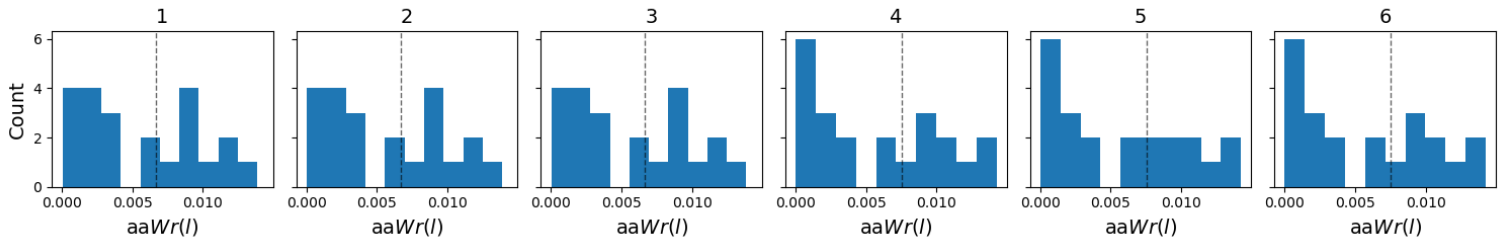

7f29 (6-42): Gantenerumab (18-27) epitope

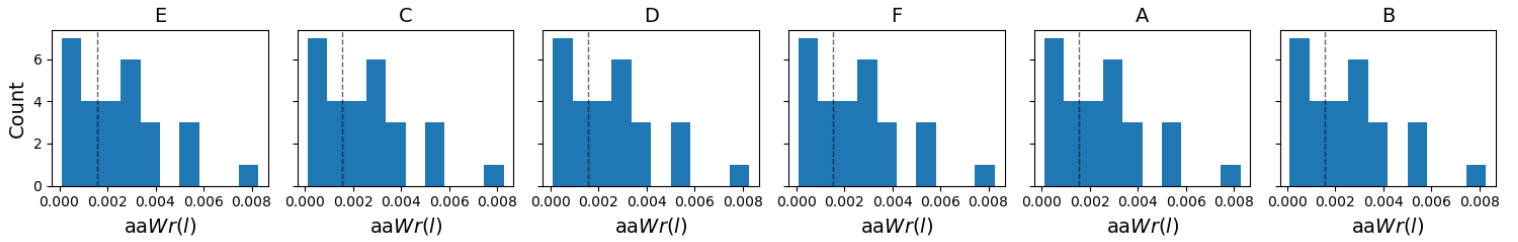

7q4b (9-42): Gantenerumab (18-27) epitope

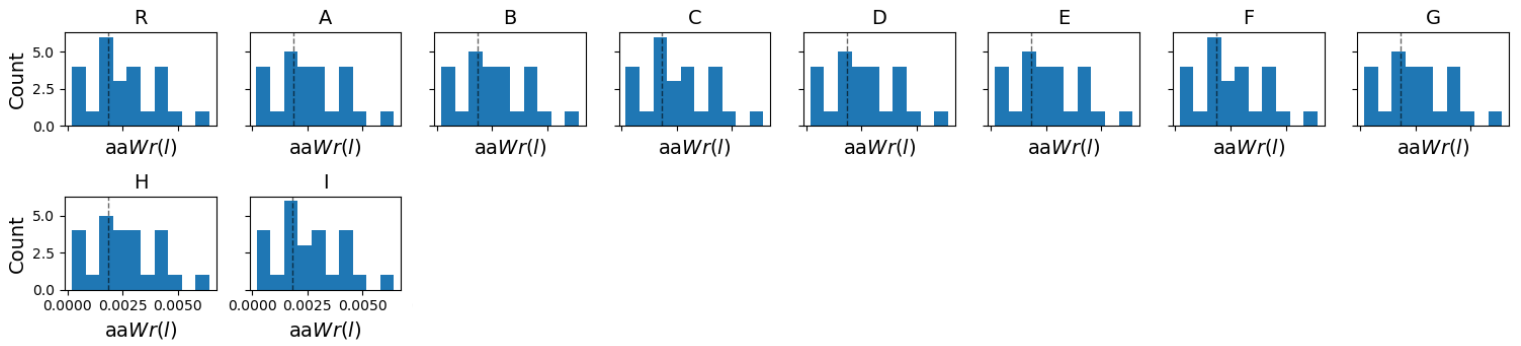

7q4m (12-42): Gantenerumab (18-27) epitope

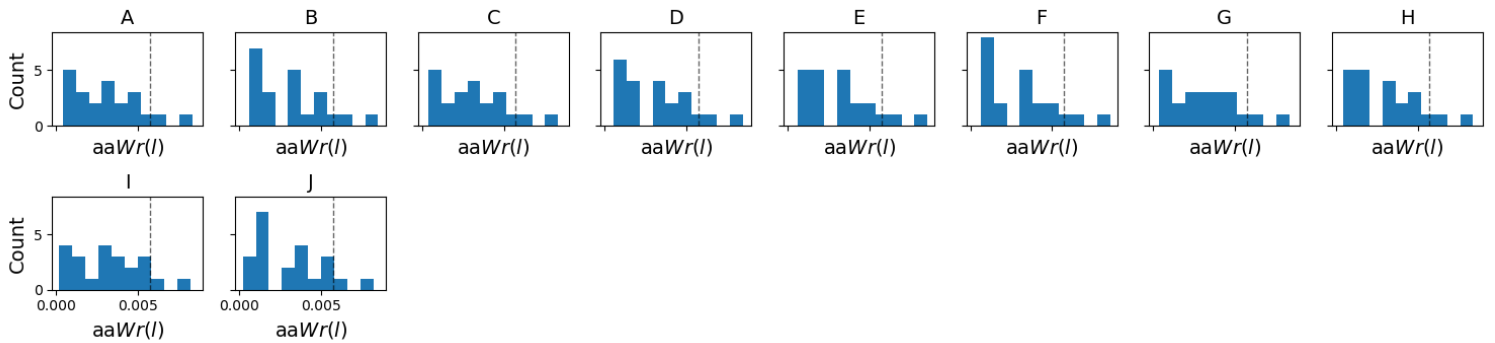

8azs (9-42): Gantenerumab (18-27) epitope

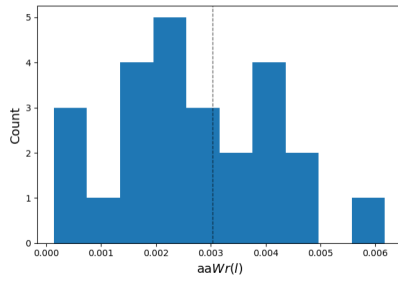

8azt (12-42): Gantenerumab (18-27) epitope

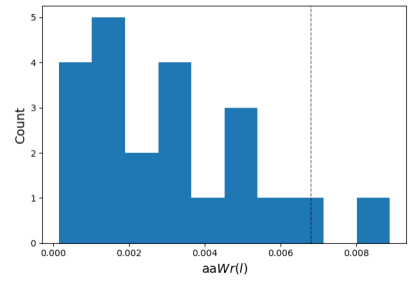

8bfa (1-38): Gantenerumab (18-27) epitope

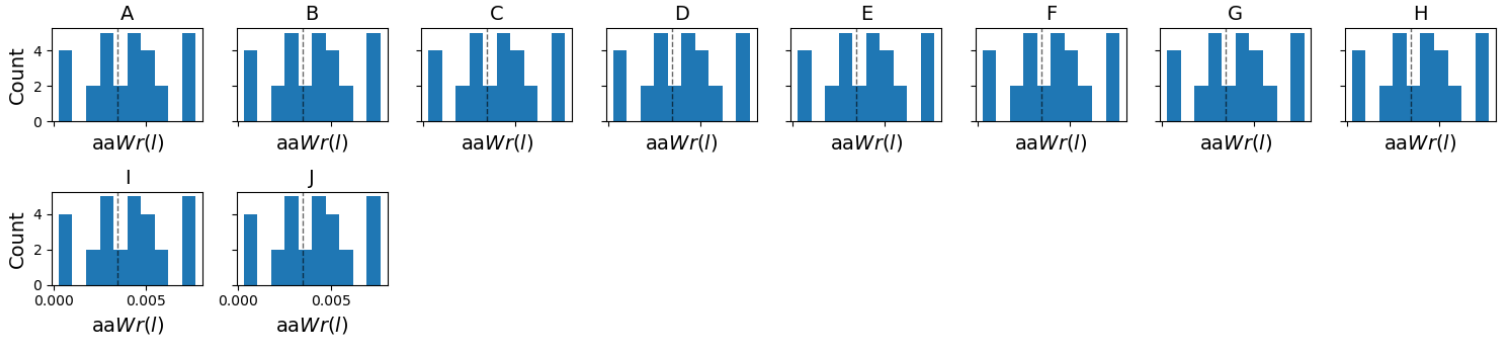

8bfb (1-38): Gantenerumab (18-27) epitope

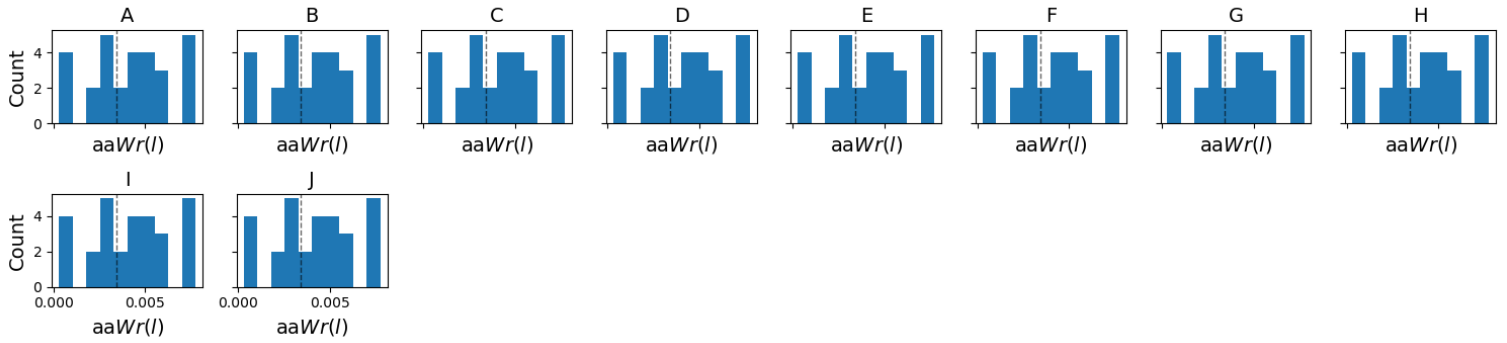

8bfz (12-42): Gantenerumab (18-27) epitope

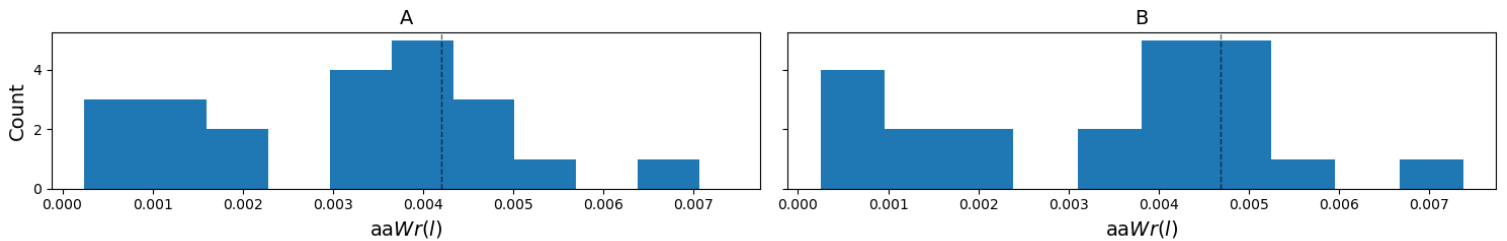

8bg0 (11-37): Gantenerumab (18-27) epitope

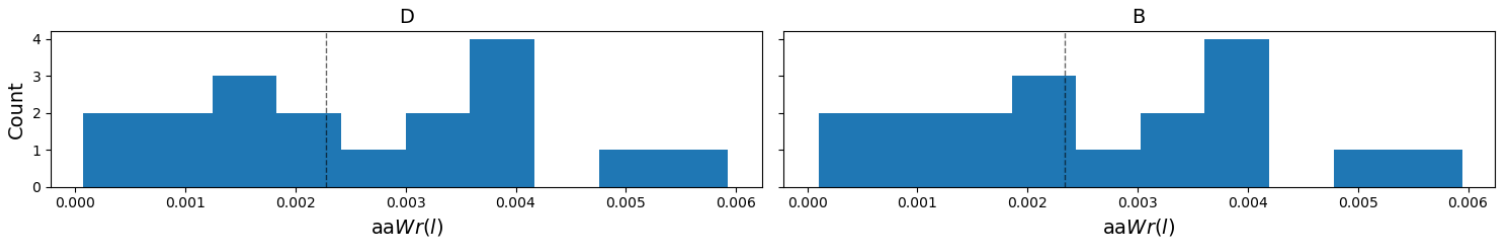

8bg0 (12-40): Gantenerumab (18-27) epitope

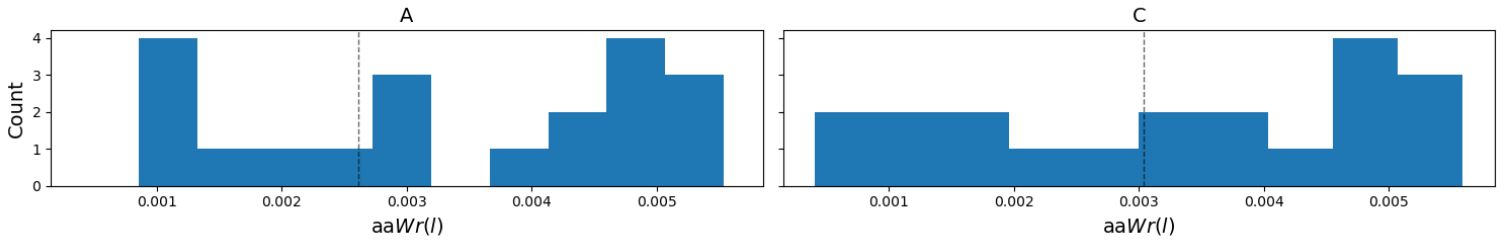

8bg9 (1-37): Gantenerumab (18-27) epitope

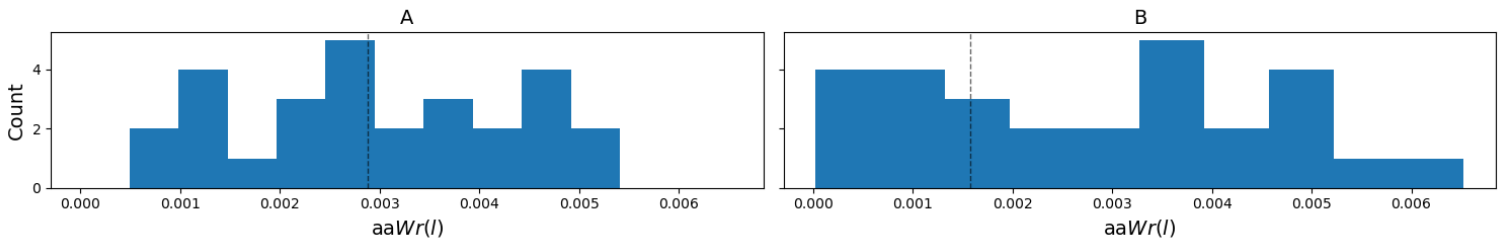

8ezd (12-42): Gantenerumab (18-27) epitope

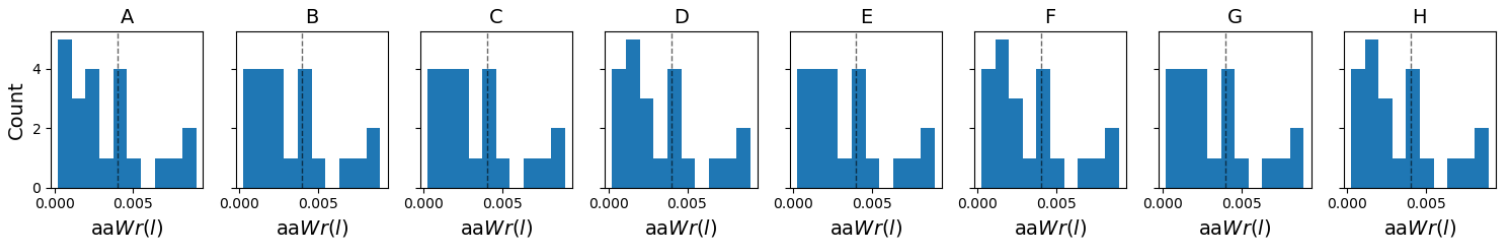

8eze (1-42): Gantenerumab (18-27) epitope

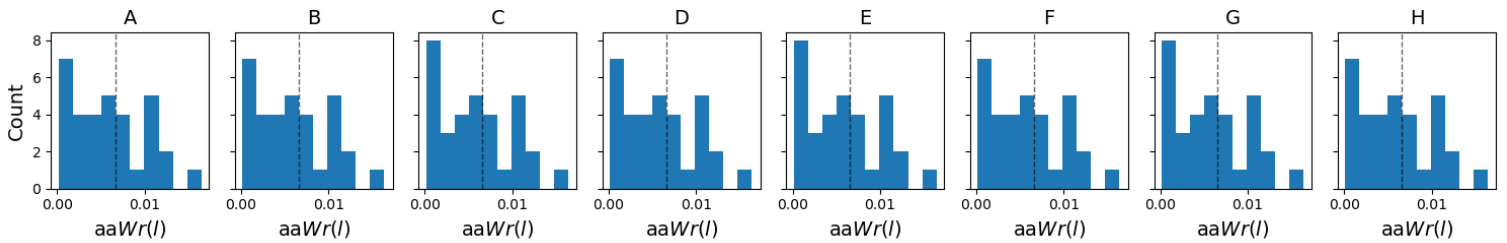

### 8kew (9-42): Gantenerumab (18-27) epitope

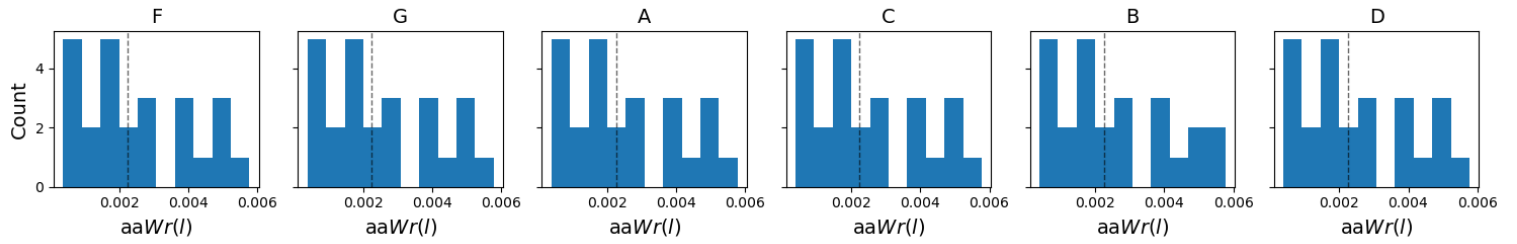

### 8kf1 (9-42): Gantenerumab (18-27) epitope

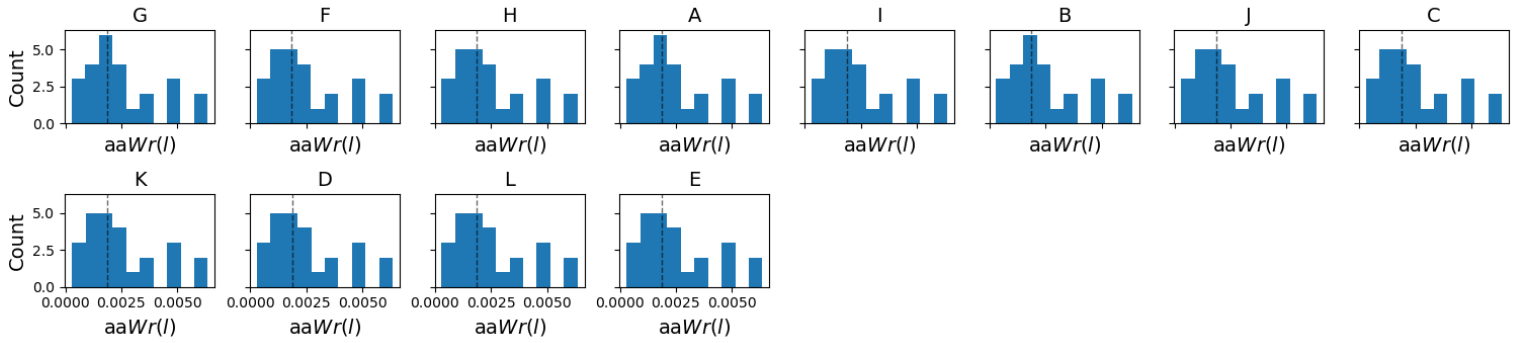

### 8kf3 (9-42): Gantenerumab (18-27) epitope

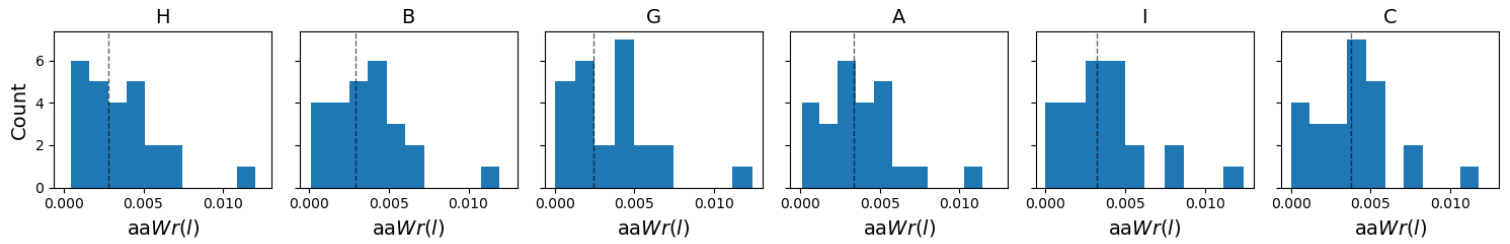

### 8kf3 (12-42): Gantenerumab (18-27) epitope

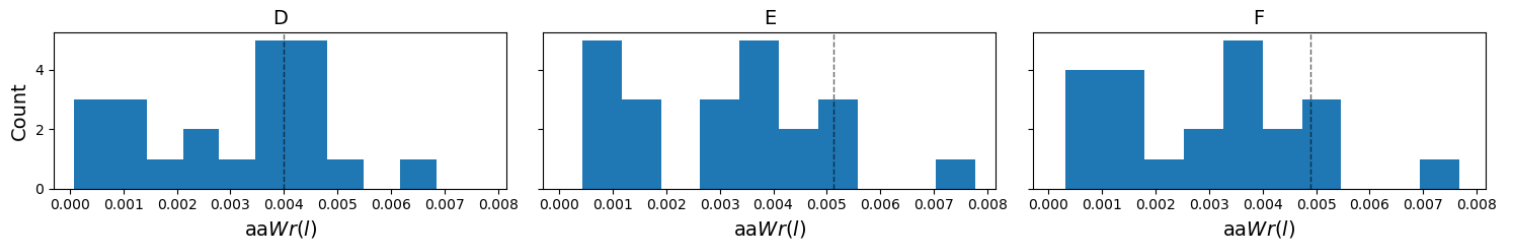

### 8kf4 (9-42): Gantenerumab (18-27) epitope

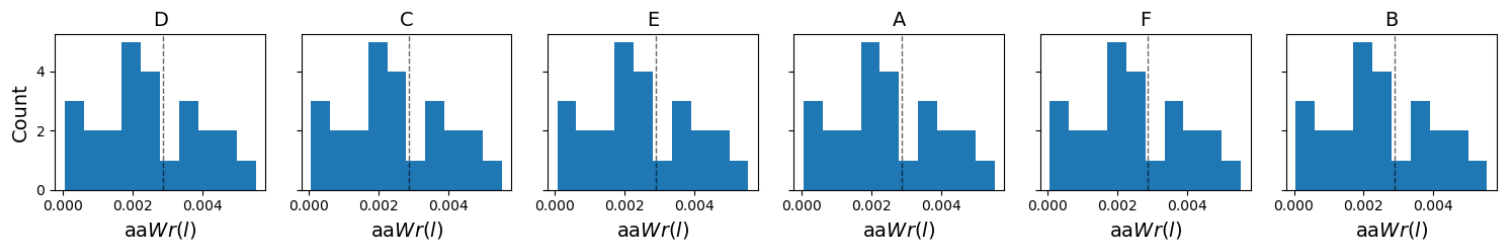

8kf5 (9-42): Gantenerumab (18-27) epitope

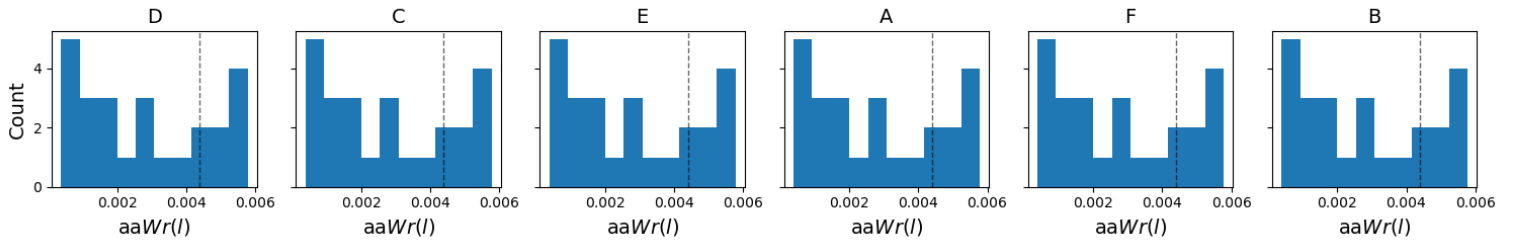

8kf6 (9-42): Gantenerumab (18-27) epitope

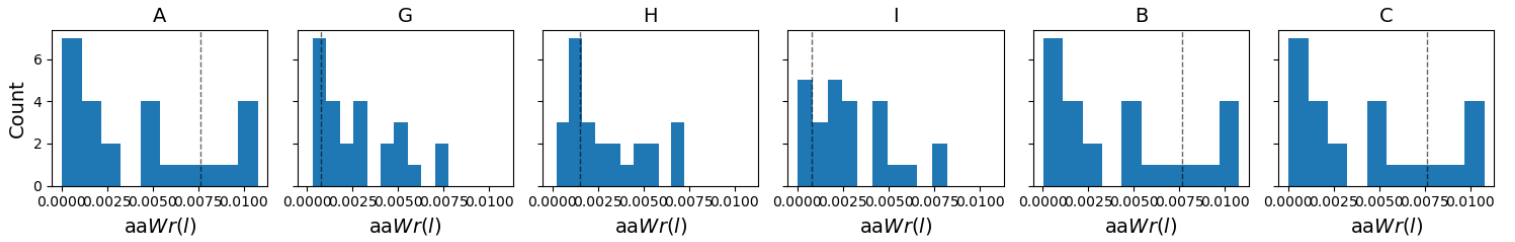

8kf6 (12-42): Gantenerumab (18-27) epitope

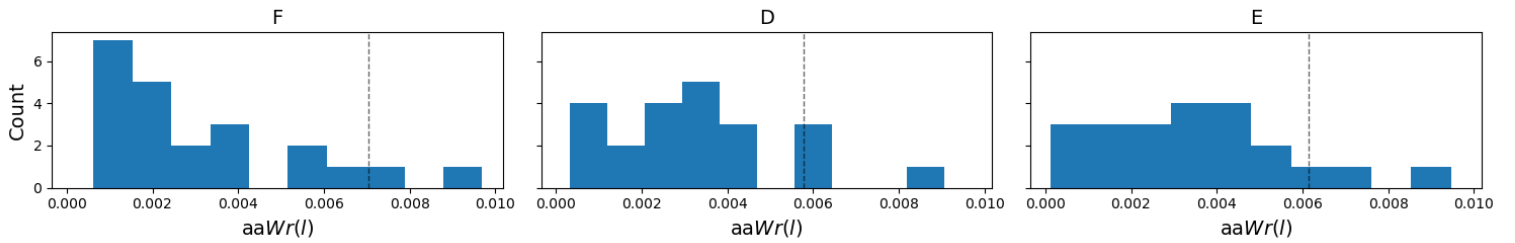

8ol2 (12-42): Gantenerumab (18-27) epitope

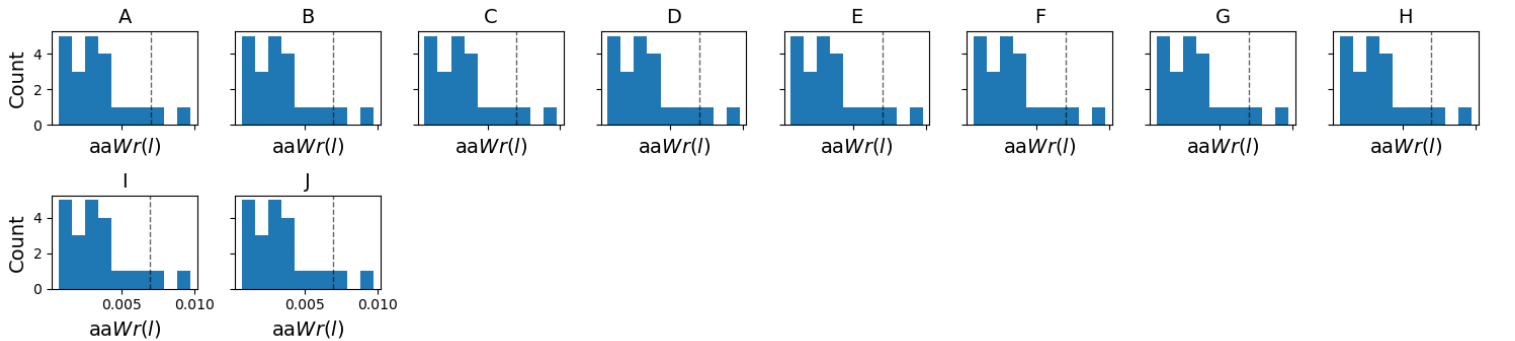

8ol3 (10-42): Gantenerumab (18-27) epitope

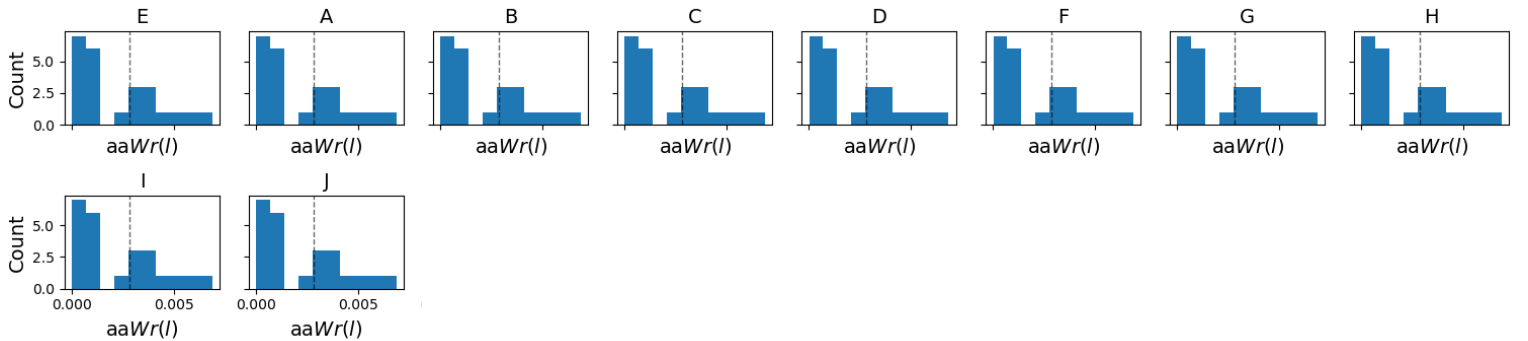

### 8oI5 (12-42): Gantenerumab (18-27) epitope

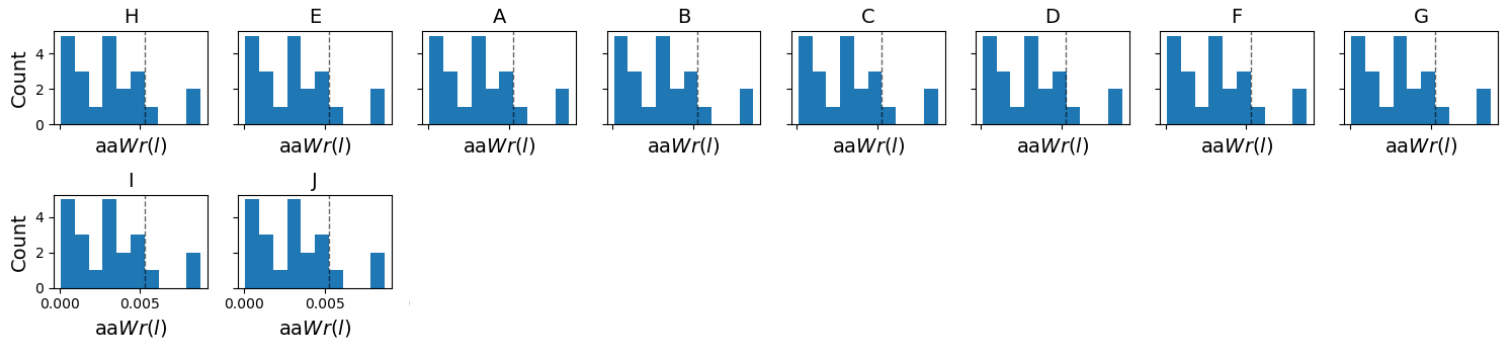

### 8oI6 (12-42): Gantenerumab (18-27) epitope

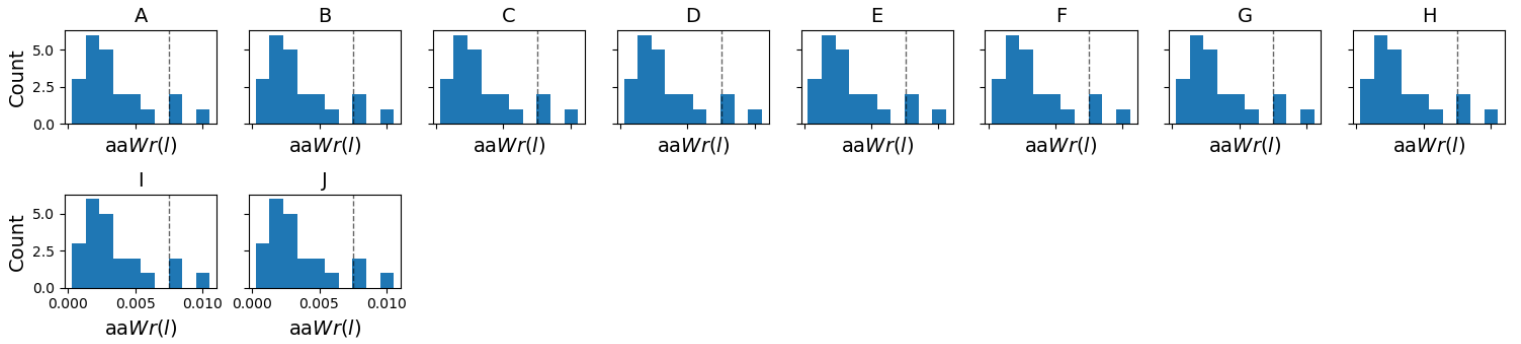

### 8oI7 (9-40): Gantenerumab (18-27) epitope

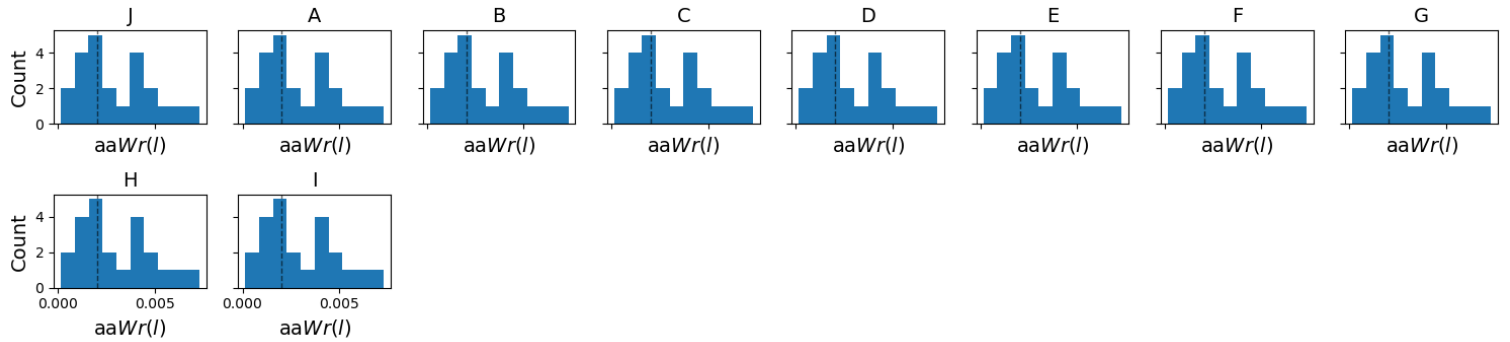

### 8oIg (1-39): Gantenerumab (18-27) epitope

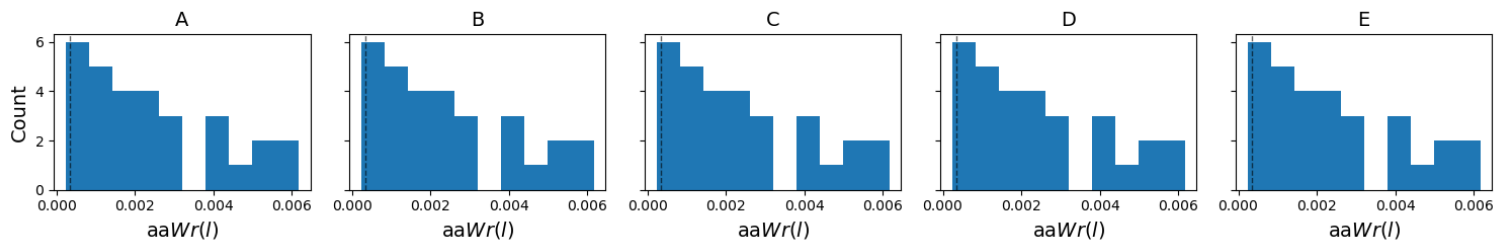

### 80ln (1-36): Gantenerumab (18-27) epitope

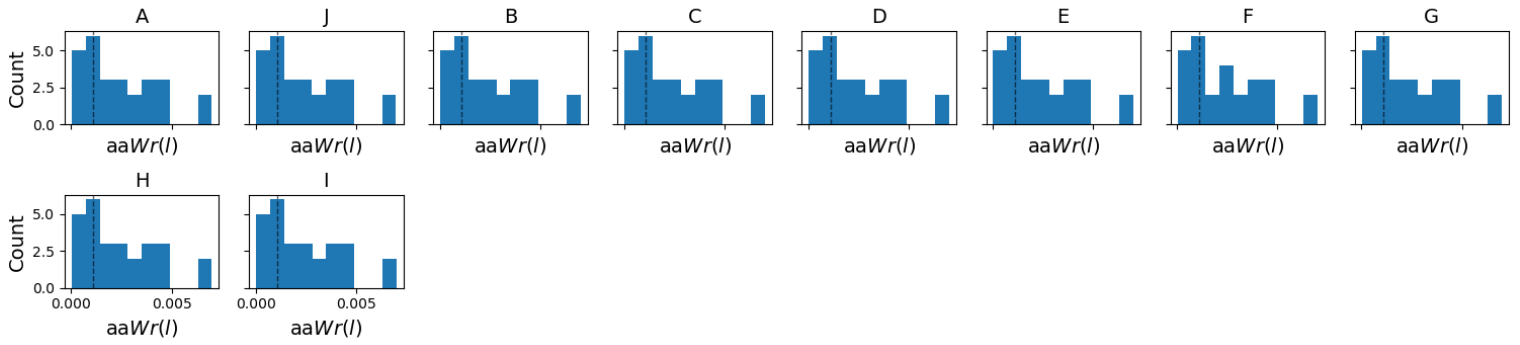

### 80lo (10-40): Gantenerumab (18-27) epitope

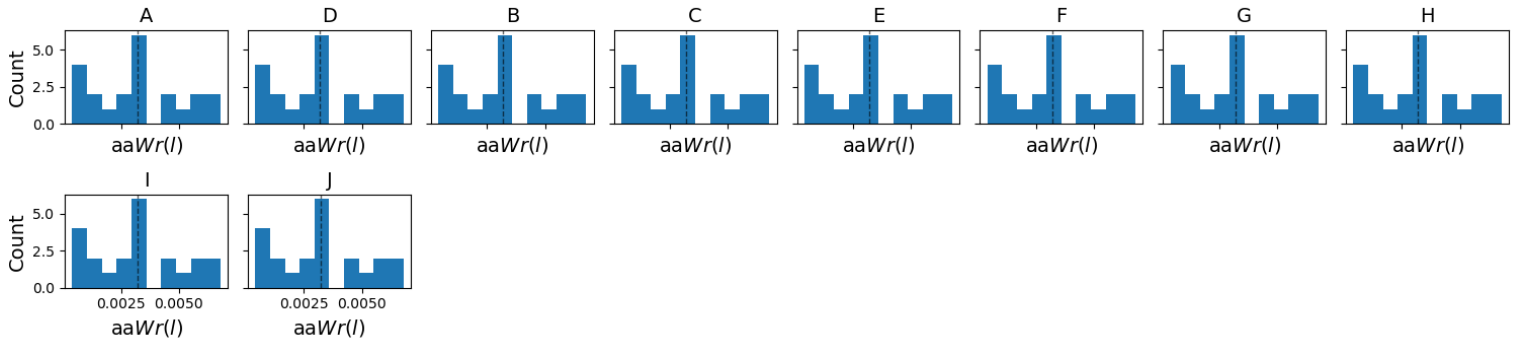

### 80lq (2-33): Gantenerumab (18-27) epitope

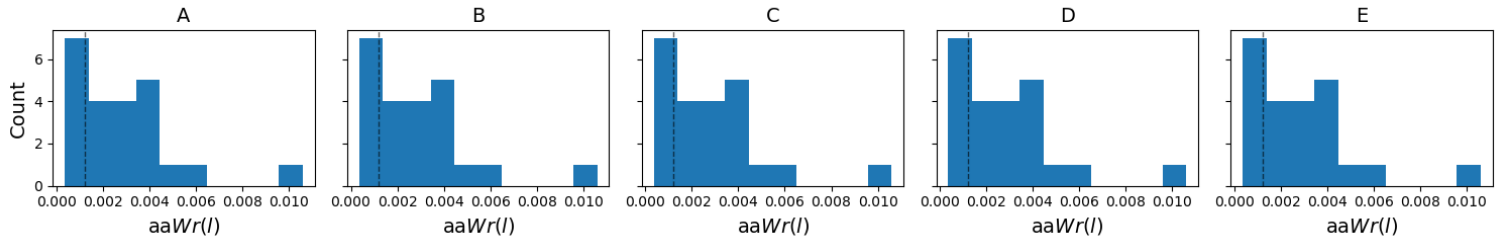

### 80t1 (13-40): Gantenerumab (18-27) epitope

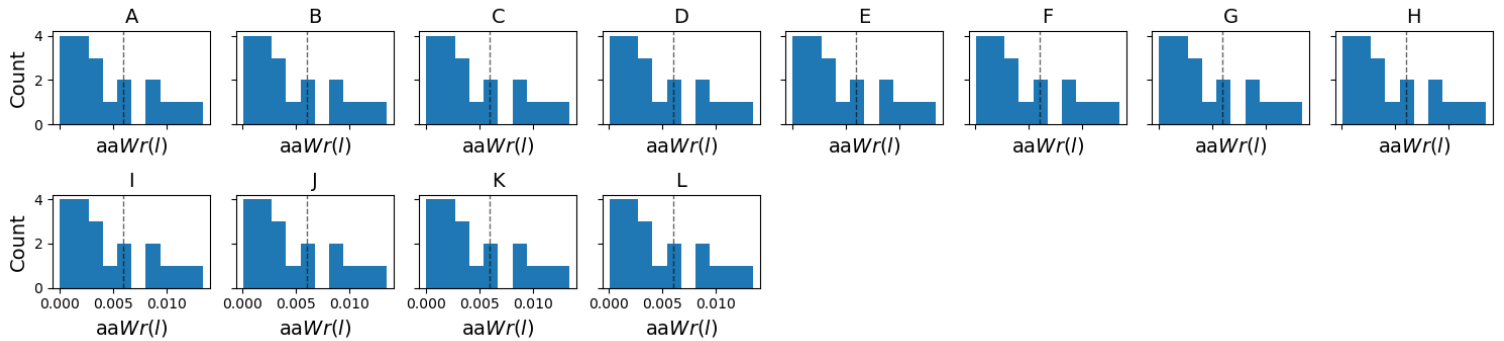

### 8ot3 (13-40): Gantenerumab (18-27) epitope

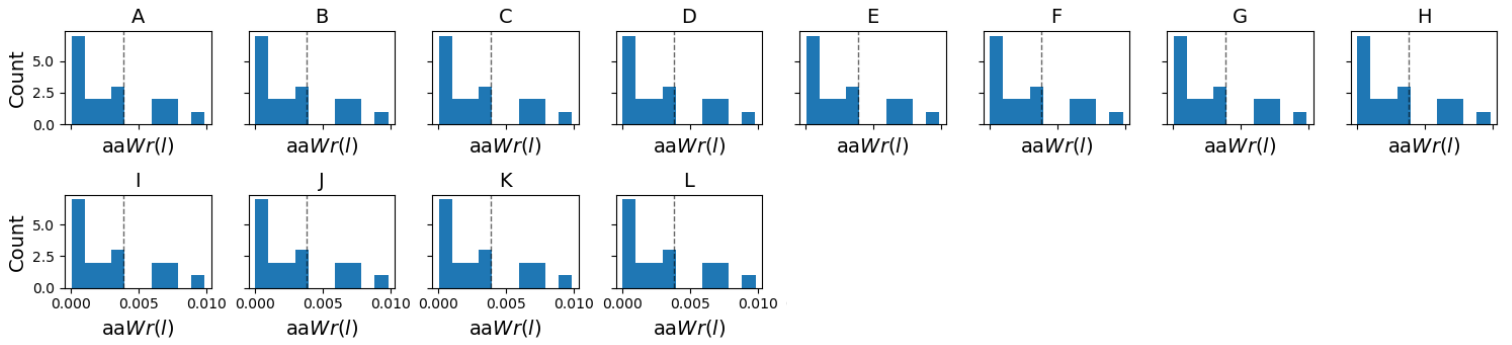

### 8ot4 (1-37): Gantenerumab (18-27) epitope

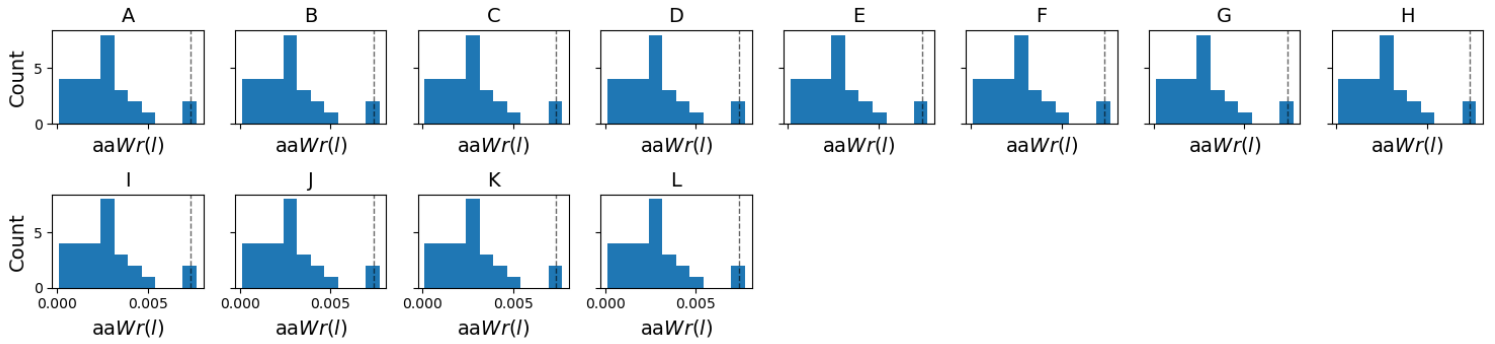

### 8otf (12-42): Gantenerumab (18-27) epitope

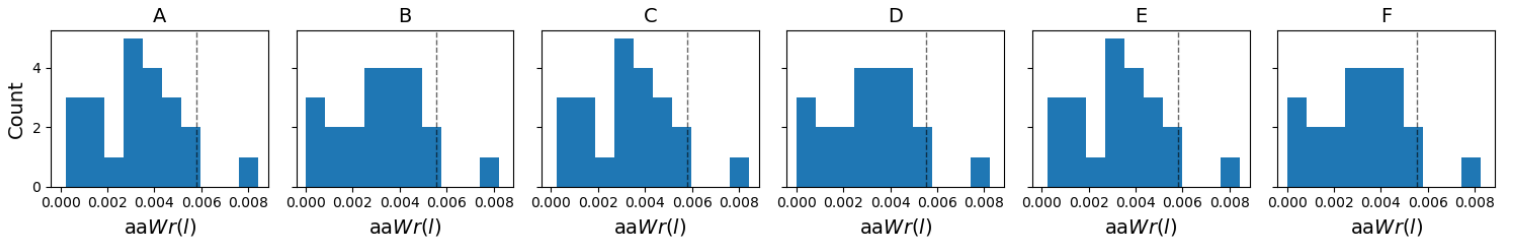

### 8ovk (1-40): Gantenerumab (18-27) epitope

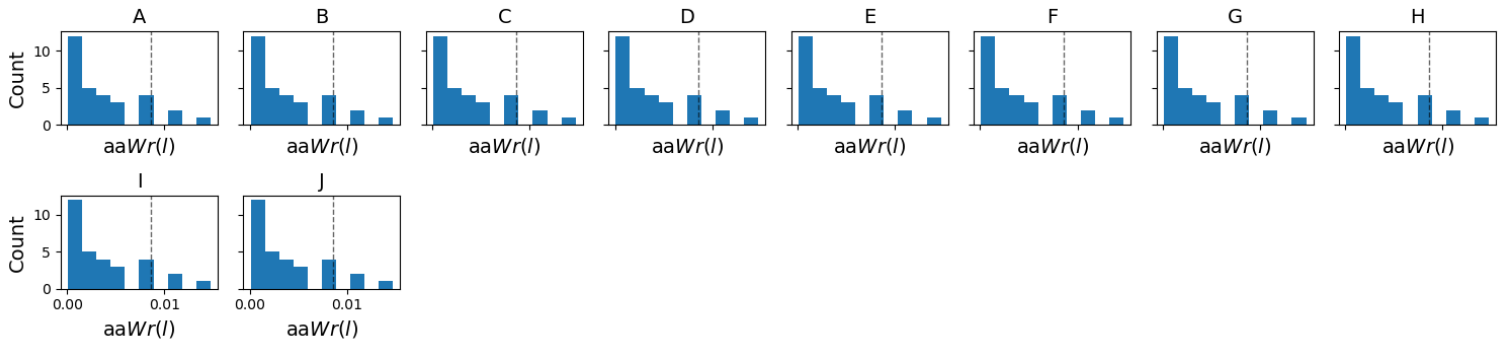

### 8ovm (5-40): Gantenerumab (18-27) epitope

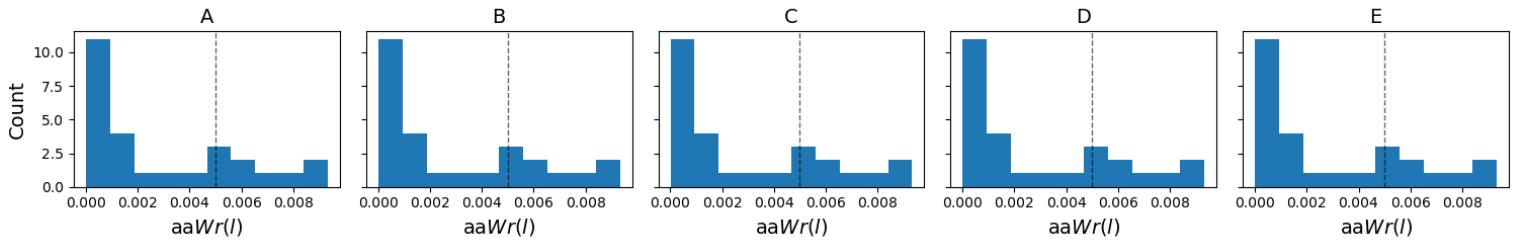

### 8owd (1-40): Gantenerumab (18-27) epitope

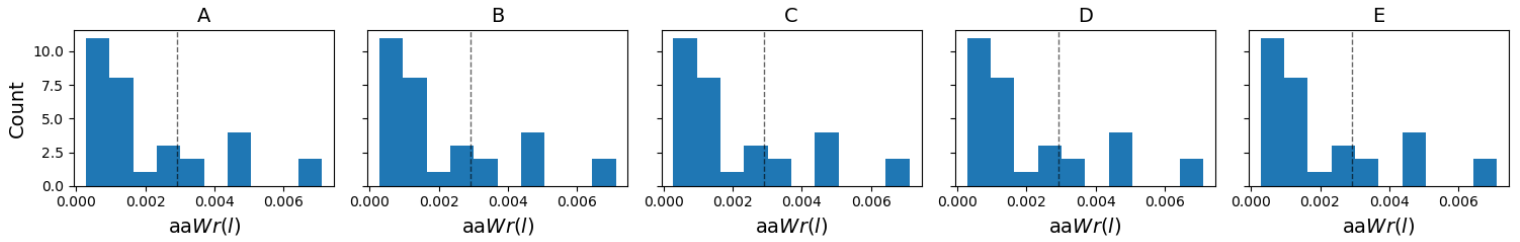

### 8owe (1-40): Gantenerumab (18-27) epitope

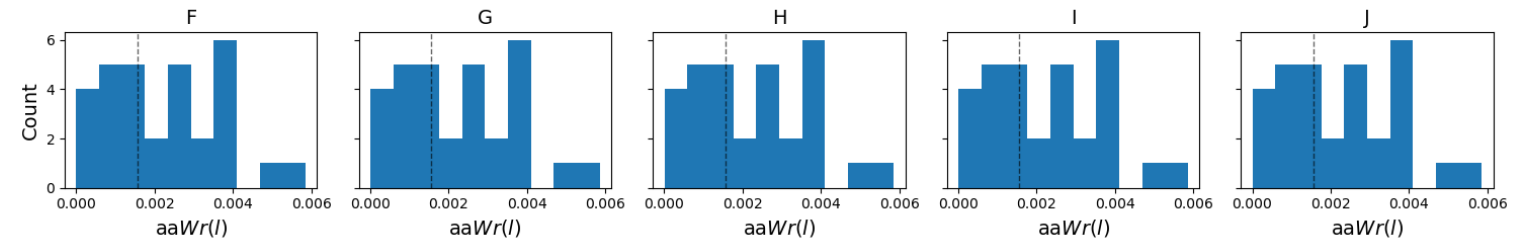

### 8owe (4-40): Gantenerumab (18-27) epitope

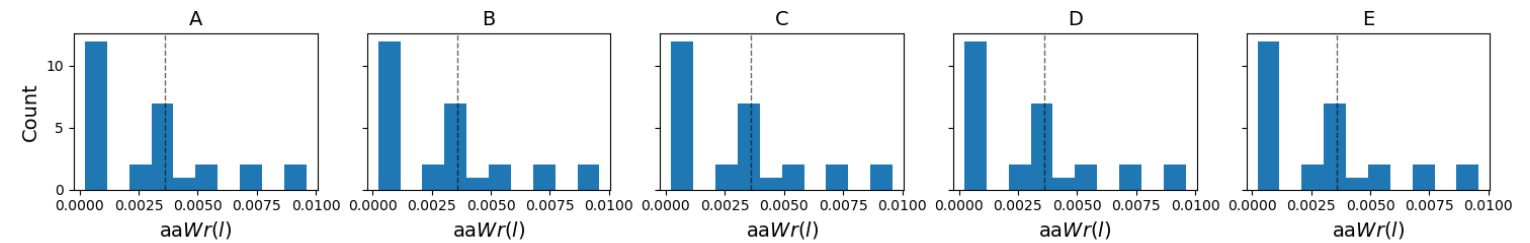

### 8owj (5-40): Gantenerumab (18-27) epitope

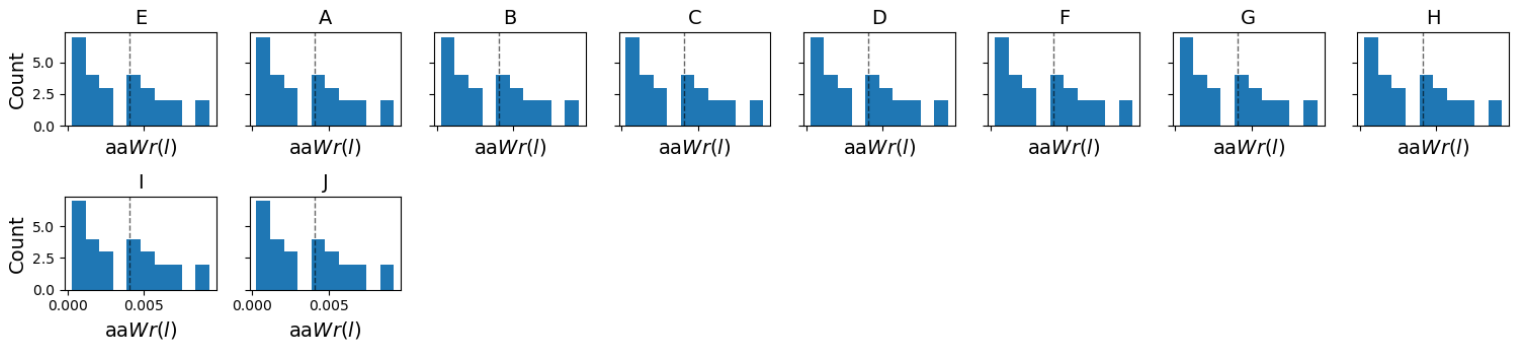

### 8owk (1-40): Gantenerumab (18-27) epitope

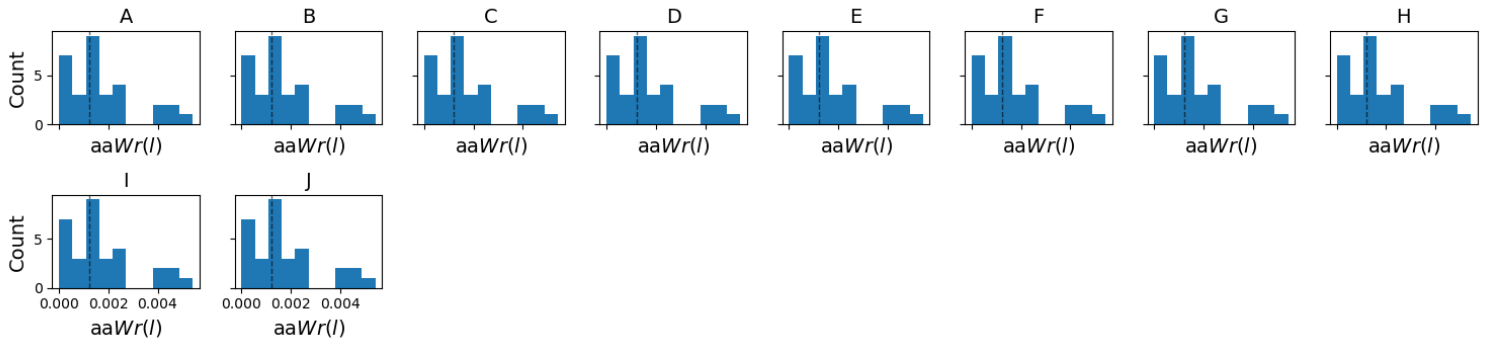

### 8qn6 (1-38): Gantenerumab (18-27) epitope

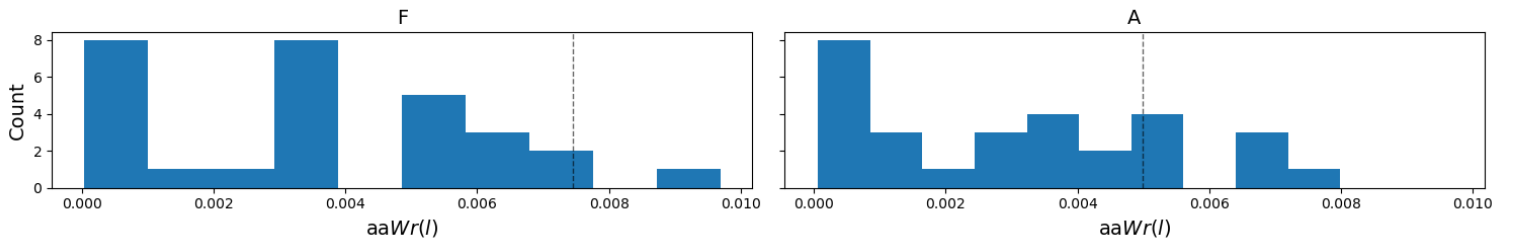

### 8qn7 (1-38): Gantenerumab (18-27) epitope

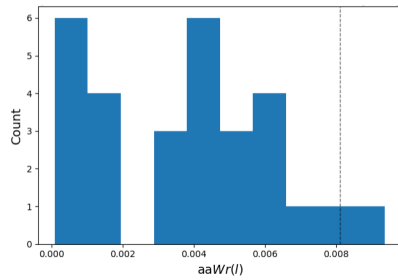

### 8sej (9-42): Gantenerumab (18-27) epitope

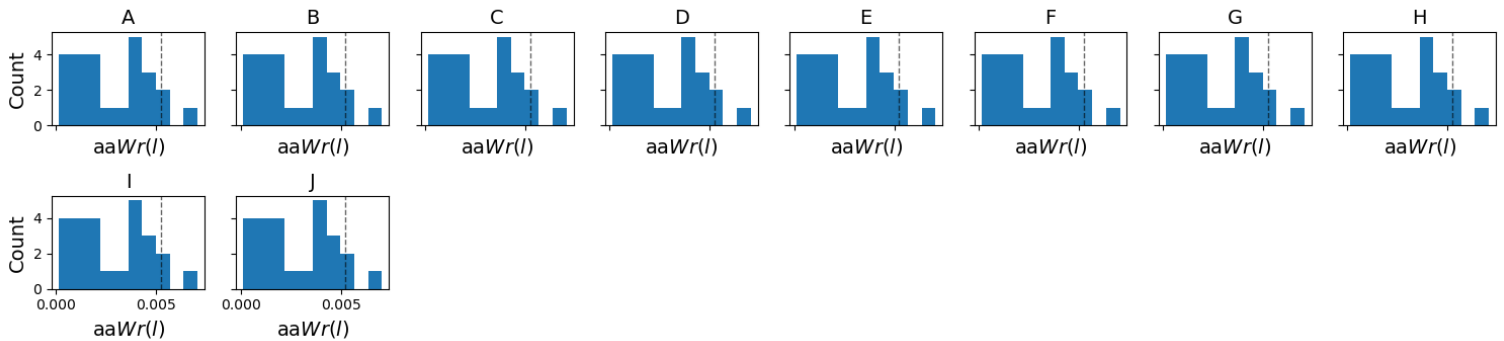

### 8sek (9-40): Gantenerumab (18-27) epitope

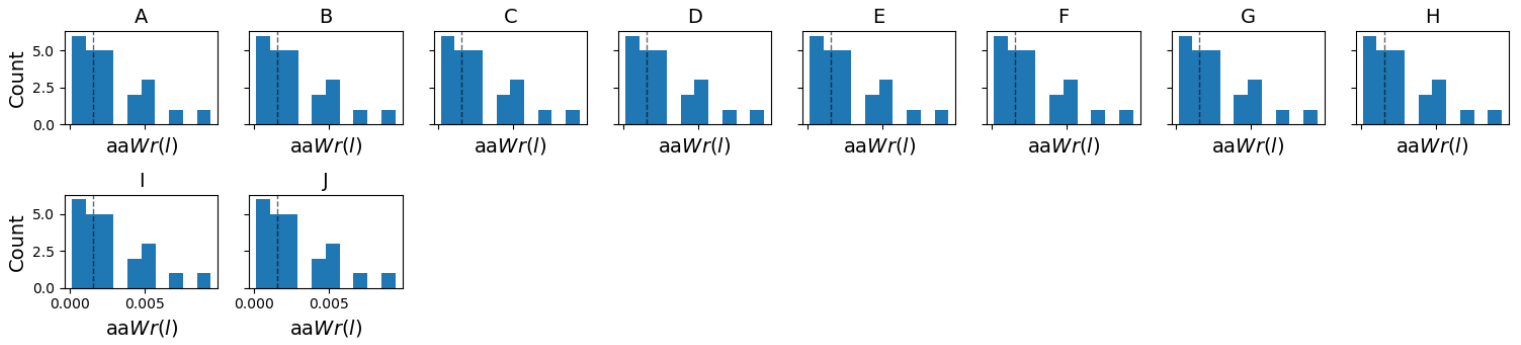

### 8sel (1-40): Gantenerumab (18-27) epitope

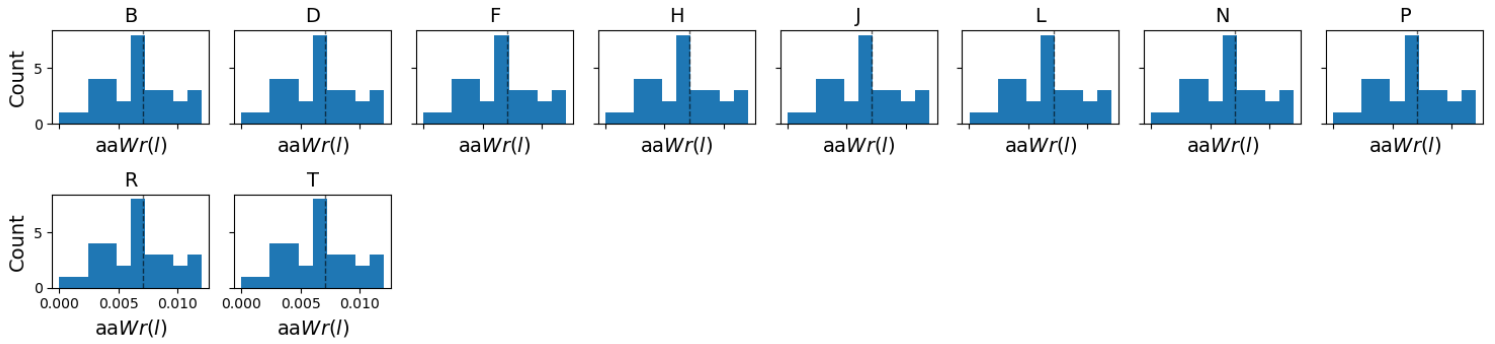

### 8sel (8-40): Gantenerumab (18-27) epitope

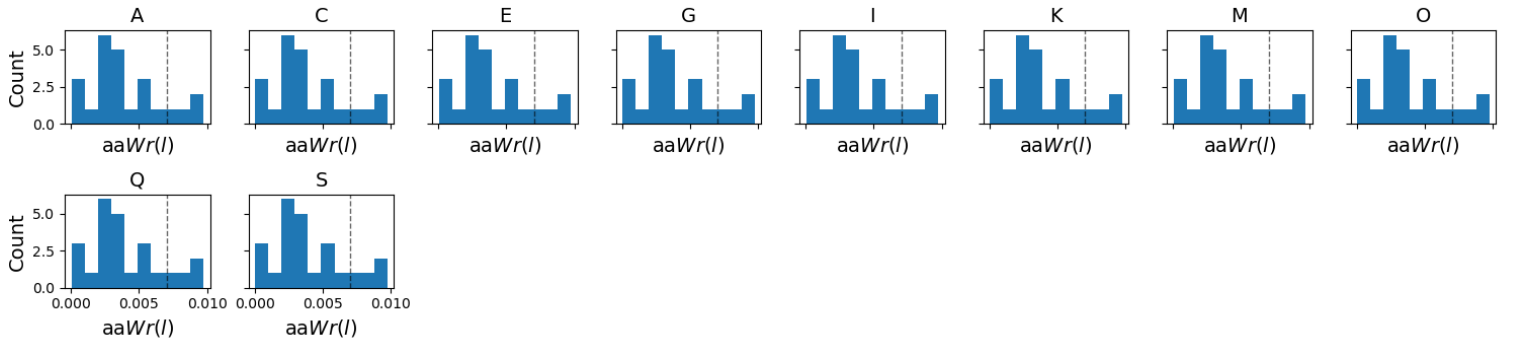

### 9jaz (9-42): Gantenerumab (18-27) epitope

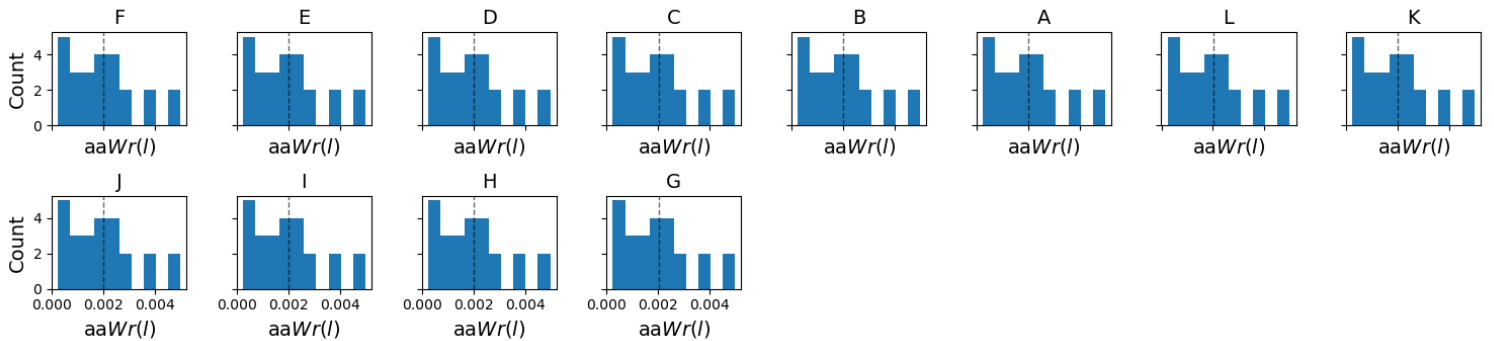

9jb0 (9-42): Gantenerumab (18-27) epitope

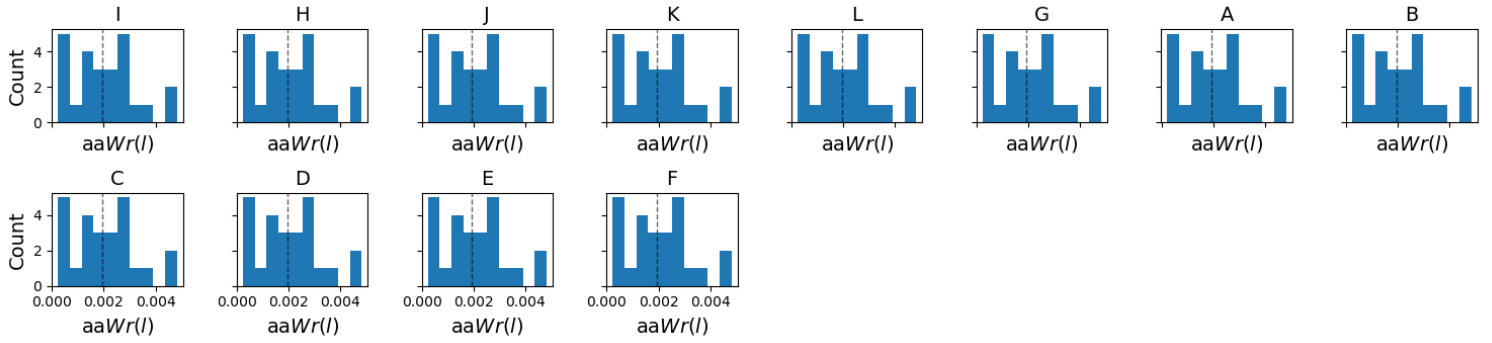

9jb1 (9-42): Gantenerumab (18-27) epitope

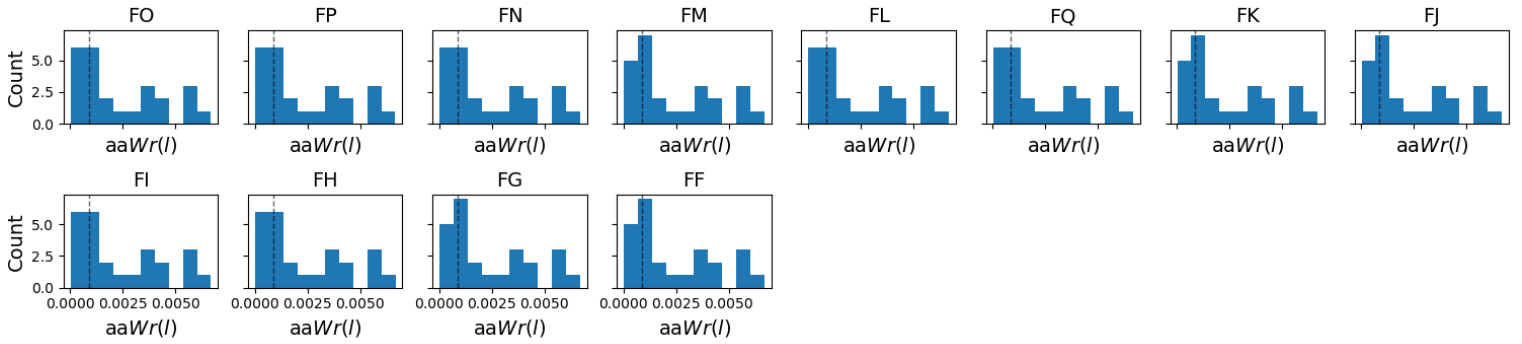

9jb2 (1-42): Gantenerumab (18-27) epitope

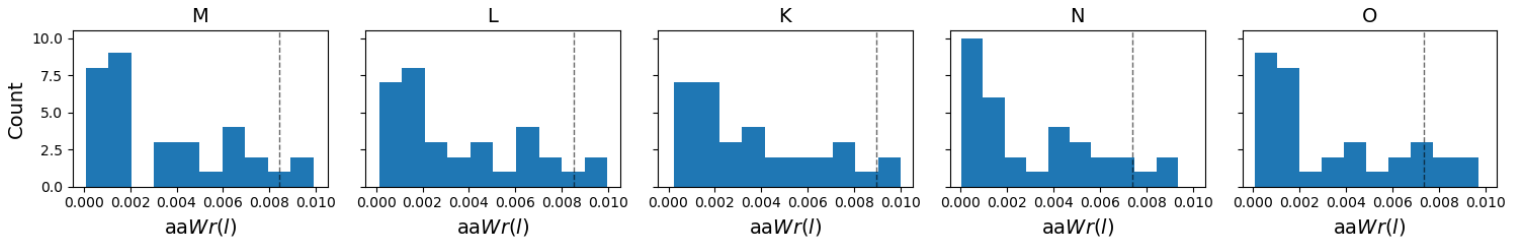

9jb2 (9-42): Gantenerumab (18-27) epitope

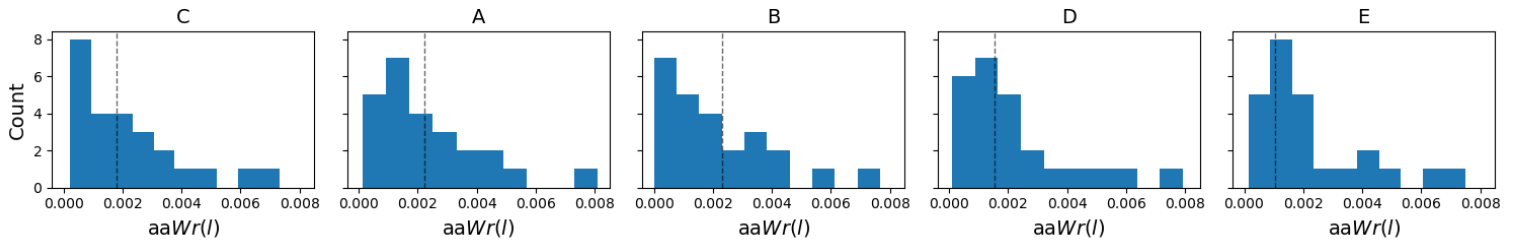

### 9jb2 (15-42): Gantenerumab (18-27) epitope

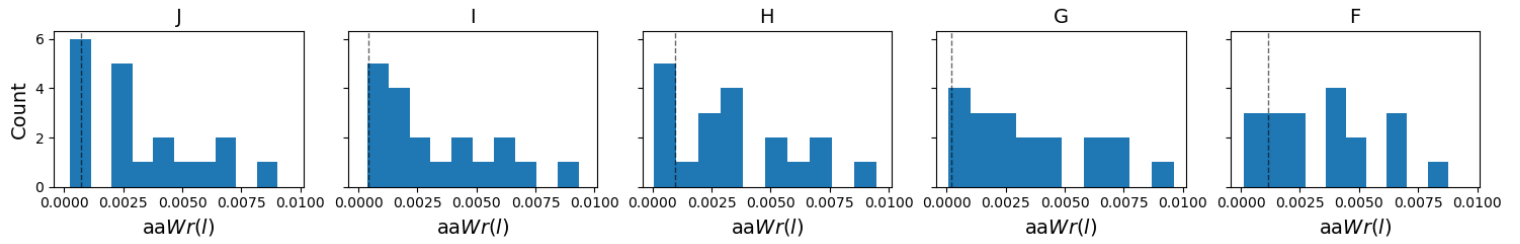

**Figure S4:** The histogram of  $aaWr(l)$  values collected with a residue window size corresponding to each epitope for 69 fibrils. The dotted lines in the panels indicate the  $aaWr(l)$  value for the epitope. (a) lecanemab (21-29), (b) lecanemab (1-16), (c) aducanumab (3-7), (d) donanemab (3-13), (e) gantenerumab (3-11), and (f) gantenerumab (18-27).
